# Supplementary material for: Synthesis of 3-aminotetrahydro-1H-carbazols by visible-light photocatalyzed cycloaddition of cyclopropylanilines with 2-alkenylarylisocyanides
Source: Royal Society of Chemistry journal article supplement (doi:10.1039/d3cc04674e), 2023-01-01

## Supporting Information

### Synthesis of 3-Aminotetrahydro-1*H*-carbazols by Visible-Light Photocatalyzed Cycloaddition of Cyclopropylanilines with 2-Alkenylarylisocyanides

#### Table of content

|                                                 |     |
|-------------------------------------------------|-----|
| I. General Information .....                    | S2  |
| II. Experimental Procedures .....               | S3  |
| III. Crystal Data for 3aa (CCDC: 2265600) ..... | S8  |
| IV. Characterization Data for Products .....    | S13 |
| V. References .....                             | S30 |
| VI. NMR Spectra of All Compound .....           | S31 |

## I. General Information

Unless otherwise stated, all reagents were purchased from commercial suppliers and used without further purification. Reactions were monitored by Thin Layer Chromatography (TLC) using UV light (254/365 nm) for detection. Flash chromatography was carried out using silica gel (200- 300 mesh). <sup>1</sup>H NMR and <sup>13</sup>C NMR spectra were recorded at 25 °C on a JEOL 400 MHz and 100 MHz NMR spectrometers or Bruker 600 MHz and 150 MHz NMR spectrometers. For <sup>1</sup>H NMR, tetramethyl silane (TMS) served as internal standard ( $\delta=0$ ) and data are reported as follows: chemical shift, integration, multiplicity (s = singlet, d = doublet, t = triplet, q = quartet, m = multiplet), and coupling constant(s) in Hz. For <sup>13</sup>C NMR, TMS ( $\delta=0$ ) was used as internal standard and spectra were obtained with complete proton decoupling. High resolution mass spectra (HRMS) were acquired on a Bruker Daltonics MicroTof-Q II mass spectrometer. Crystal measurement was recorded on Bruker D8 QUEST.

## II. Experimental Procedures

### (1). General Procedure for the Synthesis of Aryl Isocyanides

Aryl isocyanides were synthesized according to literature reports. **1a-1c**<sup>[1]</sup>, **1e**<sup>[1]</sup>, **1g-1i**<sup>[1]</sup>, **1k**<sup>[1]</sup>, **1l**<sup>[1]</sup>, **1m**<sup>[2]</sup>, **1s**<sup>[2]</sup>, **1p**<sup>[3]</sup>, **1q**<sup>[3]</sup>, **1t**<sup>[4]</sup> are known compounds. The characterization data of new isocyanides **1d**, **1f**, **1j**, **1n**, **1o**, **1r** are as following:

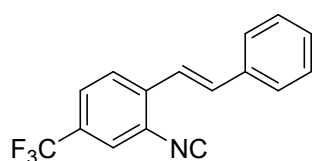

(*E*)-2-isocyano-1-styryl-4-(trifluoromethyl)benzene (**1d**)

White solid, Column chromatography on silica gel (Eluent: petroleum ether/ethyl acetate, 30/1). <sup>1</sup>H NMR (400 MHz, CDCl<sub>3</sub>)

δ 7.90 (d, *J* = 8.7 Hz, 1H), 7.69 – 7.60 (m, 4H), 7.49 – 7.38 (m, 4H), 7.37 – 7.29 (m, 1H).

<sup>13</sup>C NMR (101 MHz, CDCl<sub>3</sub>) δ 169.3, 137.2, 135.8, 135.3, 130.1 (C-F, <sup>2</sup>*J*<sub>C-F</sub> = 33.8 Hz),

129.4, 129.0, 127.4, 126.2, 126.1, 126.1, 126.1, 124.6 (C-F, <sup>3</sup>*J*<sub>C-F</sub> = 4.1 Hz), 121.8, 120.8.

HRMS (ESI) *m/z* [M + H]<sup>+</sup> calcd for C<sub>16</sub>H<sub>11</sub>F<sub>3</sub>N 274.0838; found 274.0833.

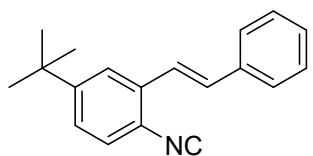

(*E*)-4-(tert-butyl)-1-isocyano-2-styrylbenzene (**1f**)

White solid, Column chromatography on silica gel (Eluent: petroleum ether/ethyl acetate, 30/1). <sup>1</sup>H NMR (400 MHz, CDCl<sub>3</sub>)

δ 7.80 (d, *J* = 1.7 Hz, 1H), 7.71 – 7.63 (m, 2H), 7.54–7.44 (m, 3H), 7.42–7.35 (m, 3H), 7.28

(d, *J* = 16.3 Hz, 1H), 1.45 (s, 9H). <sup>13</sup>C NMR (101 MHz, CDCl<sub>3</sub>) δ 166.4, 152.9, 136.6,

133.1, 132.2, 128.9, 128.6, 127.1, 127.0, 125.6, 122.9, 122.3, 35.1, 31.2. HRMS (ESI) *m/z*

[M + H]<sup>+</sup> calcd for C<sub>19</sub>H<sub>20</sub>N 262.1590; found 262.1587.

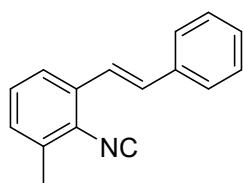

(*E*)-2-isocyano-1-methyl-3-styrylbenzene (**1j**)

White solid, Column chromatography on silica gel (Eluent: petroleum ether/ethyl acetate, 30/1). <sup>1</sup>H NMR (400 MHz, CDCl<sub>3</sub>) δ 7.65 – 7.58

(m, 3H), 7.53 – 7.40 (m, 3H), 7.39 – 7.29 (m, 2H), 7.26 – 7.18 (m, 2H), 2.50 (s, 3H). <sup>13</sup>C

**NMR (101 MHz, CDCl<sub>3</sub>)**  $\delta$  169.3, 136.7, 135.5, 133.9, 132.6, 129.1, 128.9, 128.9, 128.5, 127.0, 122.9, 122.9, 19.1. **HRMS (ESI) m/z** [M + H]<sup>+</sup> calcd for C<sub>16</sub>H<sub>14</sub>N 220.1121; found 220.1116.

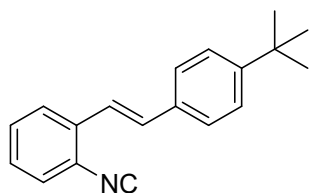

**(E)-1-(4-(tert-butyl)styryl)-2-isocyanobenzene (1n)**

White solid, Column chromatography on silica gel (Eluent: petroleum ether/ethyl acetate, 30/1). **<sup>1</sup>H NMR (400 MHz, CDCl<sub>3</sub>)**

$\delta$  7.82–7.75 (m, 1H), 7.59 – 7.54 (m, 2H), 7.49 – 7.39 (m, 5H), 7.32 – 7.29 (m, 1H), 7.24 (d,  $J$  = 16.2 Hz, 1H), 1.39 (s, 9H). **<sup>13</sup>C NMR (101 MHz, CDCl<sub>3</sub>)**  $\delta$  166.9, 152.0, 134.0, 133.7, 132.6, 129.5, 127.9, 127.4, 126.9, 125.8, 125.4, 121.5, 34.8, 31.3. **HRMS (ESI) m/z** [M + H]<sup>+</sup> calcd for C<sub>19</sub>H<sub>20</sub>N 262.1590; found 262.1585.

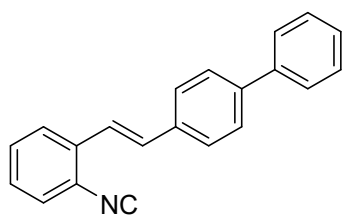

**(E)-4-(2-isocyanostyryl)-1,1'-biphenyl (1o)**

White solid, Column chromatography on silica gel (Eluent: petroleum ether/ethyl acetate, 20/1). **<sup>1</sup>H NMR (400 MHz, CDCl<sub>3</sub>)**

$\delta$  7.84 – 7.78 (m, 1H), 7.69 (dd,  $J$  = 7.1, 1.2 Hz, 6H), 7.55 – 7.49 (m, 3H), 7.48 – 7.41 (m, 3H), 7.35 – 7.28 (m, 2H). **<sup>13</sup>C NMR (101 MHz, CDCl<sub>3</sub>)**  $\delta$  167.1, 141.4, 140.5, 135.5, 133.8, 132.2, 129.5, 129.0, 128.1, 127.6, 127.6, 127.6, 127.4, 127.1, 125.5, 125.0, 122.2. **HRMS (ESI) m/z** [M + H]<sup>+</sup> calcd for C<sub>21</sub>H<sub>16</sub>N 282.1277; found 282.1270.

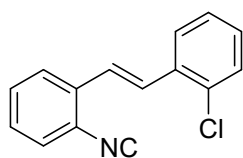

**(E)-1-chloro-2-(2-isocyanostyryl)benzene (1r)**

White solid, Column chromatography on silica gel (Eluent: petroleum ether/ethyl acetate, 20/1). **<sup>1</sup>H NMR (400 MHz, CDCl<sub>3</sub>)**  $\delta$  7.85–7.80 (m,

2H), 7.66 (d,  $J$  = 16.3 Hz, 1H), 7.51 – 7.40 (m, 4H), 7.39 – 7.26 (m, 3H). **<sup>13</sup>C NMR (101 MHz, CDCl<sub>3</sub>)**  $\delta$  167.2, 134.6, 133.9, 133.5, 130.0, 129.6, 129.6, 128.7, 128.6, 127.4, 127.2,

127.0, 125.9, 125.2, 124.7. **HRMS (ESI) m/z** [M + H]<sup>+</sup> calcd for C<sub>15</sub>H<sub>11</sub>ClN 240.0575; found 240.0567.

## (2). General Procedure for the Synthesis of *N*-Aryl Aminocyclopropane

Aryl halide derivatives and Cyclopropylamine are commercial available and used directly without purification. *N*-aryl aminocyclopropane **2a-2m** were prepared according to literature procedures [5].

## (3). General Procedure for Preparation of **3**

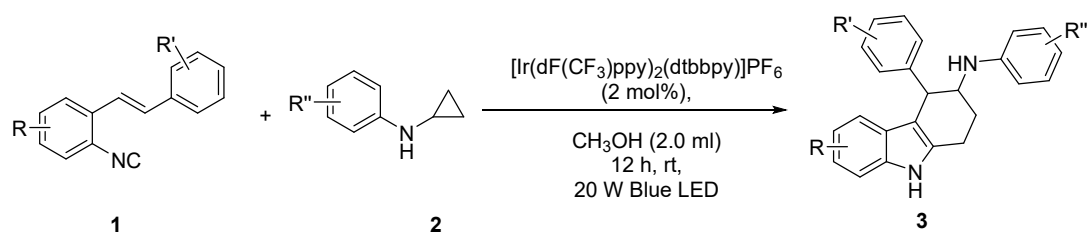

A pressure tube was charged with **1** (0.2 mmol, 1 equiv.), **2** (0.4 mmol, 2 equiv.), [Ir(dF(CF<sub>3</sub>)ppy)<sub>2</sub>(dtbbpy)]PF<sub>6</sub> (0.004 mmol, 2 mol %), CH<sub>3</sub>OH (2.0 mL). The reaction mixture was then stirred and irradiation with a 20 W blue LED at room temperature for 12 h under Ar atmosphere. After the reaction was completed as indicated by TLC analysis, the solvent was removed under reduced pressure and the residue was purified by silica gel chromatography using petroleum ether/ethyl acetate 10:1 (v/v) to give the corresponding products.

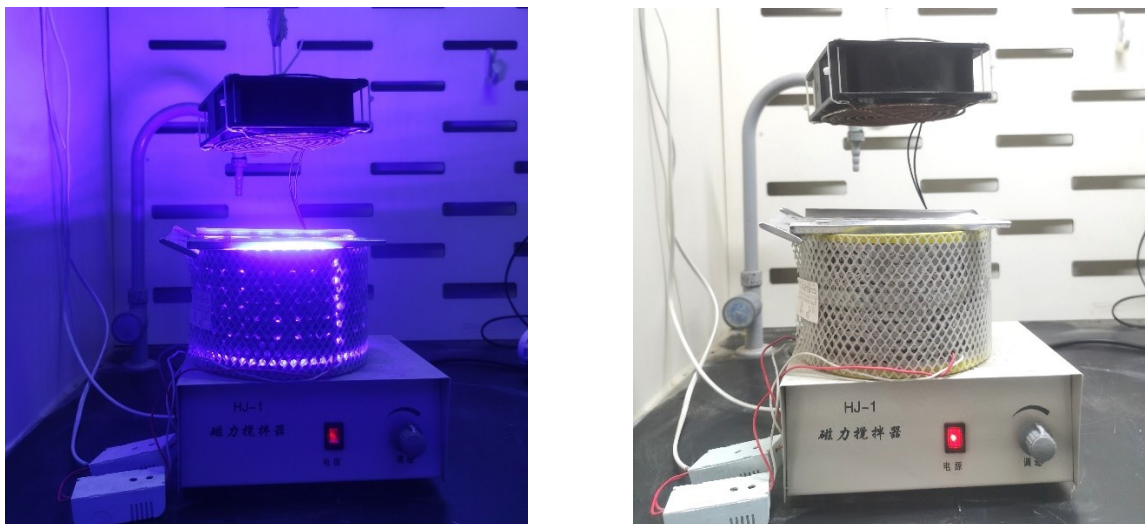

**Figure S1.** Reaction setup for photocatalyzed cycloaddition

#### (4) Control Experiments <sup>[6]</sup>

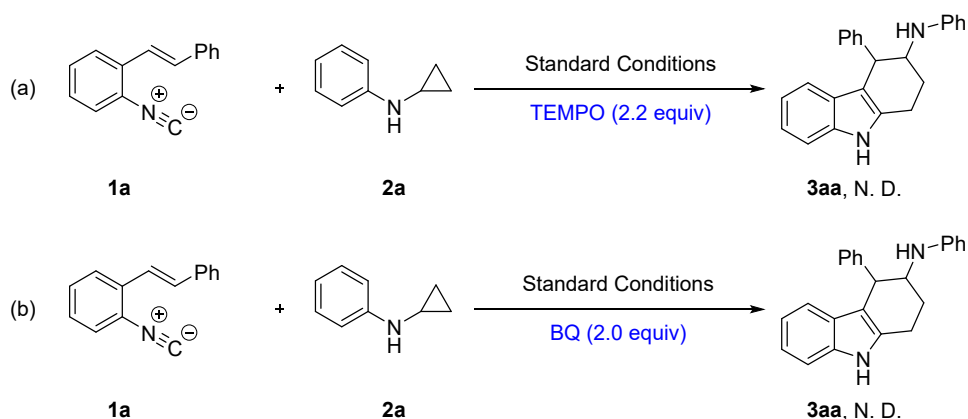

(a) A pressure tube was charged with **1** (0.2 mmol, 1 equiv.), **2** (0.4 mmol, 2 equiv.),  $[\text{Ir}(\text{dF}(\text{CF}_3)\text{ppy})_2(\text{dtbbpy})]\text{PF}_6$  (0.04 mmol, 2 mol %), TEMPO (0.44 mmol, 2.0 equiv.) and  $\text{CH}_3\text{OH}$  (2.0 mL). The reaction mixture was then stirred and irradiation with a 20 W blue LED at room temperature for 12 h under Ar atmosphere. No **3aa** was detected by TLC.

(b) A pressure tube was charged with **1** (0.2 mmol, 1 equiv.), **2** (0.4 mmol, 2 equiv.),  $[\text{Ir}(\text{dF}(\text{CF}_3)\text{ppy})_2(\text{dtbbpy})]\text{PF}_6$  (0.04 mmol, 2 mol %), BQ (0.40 mmol, 2.0 equiv.) and  $\text{CH}_3\text{OH}$  (2.0 mL). The reaction mixture was then stirred and irradiation with a 20 W blue LED at room temperature for 12 h under Ar atmosphere. No **3aa** was detected by TLC.

### (5) Scale-up synthesis of product **3aa**

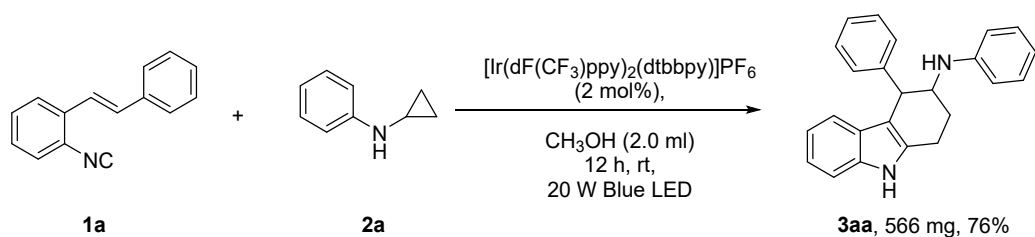

A pressure tube was charged with **1a** (2.4 mmol, 1.0 equiv.), **2a** (4.8 mmol, 2.0 equiv.),  $[\text{Ir(dF(CF}_3\text{)ppy)}_2\text{(dtbbpy)]PF}_6$  (1 mol %),  $\text{CH}_3\text{OH}$  (20 mL). The reaction mixture was then stirred and irradiation with a 20 W blue LED at room temperature for 24 h under Ar atmosphere. After the reaction was completed as indicated by TLC analysis, the solvent was removed under reduced pressure and the residue was purified by silica gel chromatography using petroleum ether/ethyl acetate 10:1 (v/v) to give the corresponding products **3aa** (566 mg, 76%).

### III. Crystal Data for **3aa** (CCDC: 2265600)

Single crystal of *N*,4-diphenyl-2,3,4,9-tetrahydro-1*H*-carbazol-3-amine (**3aa**) suitable for X-ray analysis was obtained by slow evaporation of 0.02 M solution in 20:1 mixture of petroleum hexane/ethyl acetate at room temperature. A suitable crystal was measured on a Bruker APEX-II CCD diffractometer. The crystal was kept at 276(2) K during data collection.

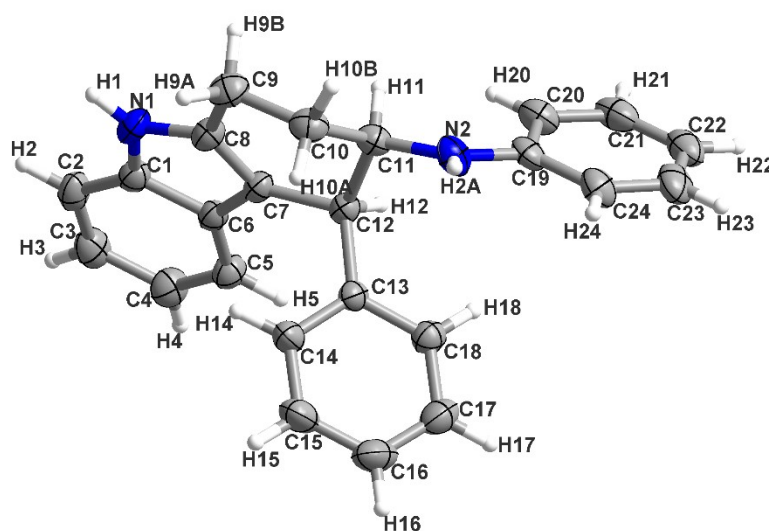

**Figure S1** X-Ray crystal structure of **3aa** (CCDC: 2265600), ellipsoids are drawn at the 30% probability level.

**Table S1** Crystal data, data collection, and structure refinement for compound **3aa**

|                   |                                                |
|-------------------|------------------------------------------------|
| Empirical formula | C <sub>24</sub> H <sub>22</sub> N <sub>2</sub> |
| Formula weight    | 338.43                                         |
| Temperature/K     | 276(2) K                                       |
| Crystal system    | monoclinic                                     |
| Space group       | P2 <sub>(1)/n</sub>                            |



|                                      |                                                              |
|--------------------------------------|--------------------------------------------------------------|
| $a/\text{\AA}$                       | 9.4607(7)                                                    |
| $b/\text{\AA}$                       | 10.9217(8)                                                   |
| $c/\text{\AA}$                       | 17.9906(14)                                                  |
| $\alpha/^\circ$                      | 90                                                           |
| $\beta/^\circ$                       | 96.556(2)                                                    |
| $\gamma/^\circ$                      | 90                                                           |
| Volume/ $\text{\AA}^3$               | 1846.8(2)                                                    |
| Z                                    | 4                                                            |
| $\rho_{\text{calc}}/\text{cm}^3$     | 1.217                                                        |
| $\mu/\text{mm}^{-1}$                 | 0.071                                                        |
| F(000)                               | 720.0                                                        |
| Crystal size/ $\text{mm}^3$          | 0.120 x 0.110 x 0.100                                        |
| Radiation                            | MoK $\alpha$ ( $\lambda = 0.71073$ )                         |
| Range for data collection            | 2.185 to 25.100                                              |
| Limiting indices                     | $-11 \leq h \leq 11, -13 \leq k \leq 13, -21 \leq l \leq 21$ |
| Reflections collected                | 52227                                                        |
| Independent reflections              | 3280 [R(int) = 0.5287]                                       |
| Data/restraints/parameters           | 3280 / 0 / 236                                               |
| Goodness-of-fit on $F^2$             | 0.828                                                        |
| Final R indices [ $I > 2\sigma(I)$ ] | $R_1 = 0.0419, wR_2 = 0.0816$                                |
| R indices (all data)                 | $R_1 = 0.1220, wR_2 = 0.0978$                                |

**Table S2.** Bond lengths [Å] and angles [deg] for **3aa**

| <b>Atom</b> | <b>Length</b> |
|-------------|---------------|
| C(1)-N(1)   | 1.376(2)      |
| C(1)-C(2)   | 1.385(3)      |
| C(1)-C(6)   | 1.411(3)      |
| C(2)-C(3)   | 1.372(3)      |
| C(3)-C(4)   | 1.391(3)      |
| C(4)-C(5)   | 1.370(2)      |
| C(5)-C(6)   | 1.390(3)      |
| C(6)-C(7)   | 1.434(3)      |
| C(7)-C(8)   | 1.354(2)      |
| C(7)-C(12)  | 1.491(3)      |
| C(8)-N(1)   | 1.378(2)      |
| C(8)-C(9)   | 1.492(3)      |
| C(9)-C(10)  | 1.522(3)      |
| C(10)-C(11) | 1.527(2)      |
| C(11)-N(2)  | 1.444(2)      |
| C(11)-C(12) | 1.562(3)      |
| C(12)-C(13) | 1.508(2)      |
| C(13)-C(14) | 1.384(2)      |
| C(13)-C(18) | 1.387(3)      |
| C(14)-C(15) | 1.382(3)      |
| C(15)-C(16) | 1.376(3)      |
| C(16)-C(17) | 1.376(3)      |
| C(17)-C(18) | 1.380(3)      |

|                   |            |
|-------------------|------------|
| C(19)-N(2)        | 1.386(2)   |
| C(19)-C(20)       | 1.388(3)   |
| C(19)-C(24)       | 1.394(3)   |
| C(20)-C(21)       | 1.389(3)   |
| C(21)-C(22)       | 1.369(3)   |
| C(22)-C(23)       | 1.373(3)   |
| C(23)-C(24)       | 1.373(3)   |
| N(1)-C(1)-C(2)    | 131.1(2)   |
| N(1)-C(1)-C(6)    | 106.90(19) |
| C(2)-C(1)-C(6)    | 122.0(2)   |
| C(3)-C(2)-C(1)    | 117.5(2)   |
| C(2)-C(3)-C(4)    | 121.6(2)   |
| C(5)-C(4)-C(3)    | 120.7(2)   |
| C(4)-C(5)-C(6)    | 119.6(2)   |
| C(5)-C(6)-C(1)    | 118.5(2)   |
| C(5)-C(6)-C(7)    | 134.4(2)   |
| C(1)-C(6)-C(7)    | 107.00(19) |
| C(8)-C(7)-C(6)    | 107.16(19) |
| C(8)-C(7)-C(12)   | 124.05(19) |
| C(6)-C(7)-C(12)   | 128.79(19) |
| C(7)-C(8)-N(1)    | 109.55(19) |
| C(7)-C(8)-C(9)    | 126.4(2)   |
| N(1)-C(8)-C(9)    | 124.0(2)   |
| C(8)-C(9)-C(10)   | 109.00(18) |
| C(9)-C(10)-C(11)  | 112.04(16) |
| N(2)-C(11)-C(10)  | 109.62(16) |
| N(2)-C(11)-C(12)  | 114.52(17) |
| C(10)-C(11)-C(12) | 111.17(17) |

|                   |            |
|-------------------|------------|
| C(7)-C(12)-C(13)  | 113.87(17) |
| C(7)-C(12)-C(11)  | 107.28(16) |
| C(13)-C(12)-C(11) | 113.72(15) |
| C(14)-C(13)-C(18) | 117.82(19) |
| C(14)-C(13)-C(12) | 122.3(2)   |
| C(18)-C(13)-C(12) | 119.86(19) |
| C(15)-C(14)-C(13) | 121.0(2)   |
| C(16)-C(15)-C(14) | 120.3(2)   |
| C(17)-C(16)-C(15) | 119.6(2)   |
| C(16)-C(17)-C(18) | 119.8(2)   |
| C(17)-C(18)-C(13) | 121.5(2)   |
| N(2)-C(19)-C(20)  | 123.2(2)   |
| N(2)-C(19)-C(24)  | 118.45(19) |
| C(20)-C(19)-C(24) | 118.4(2)   |
| C(19)-C(20)-C(21) | 119.8(2)   |
| C(22)-C(21)-C(20) | 121.6(2)   |
| C(21)-C(22)-C(23) | 118.3(3)   |
| C(24)-C(23)-C(22) | 121.5(3)   |
| C(23)-C(24)-C(19) | 120.4(2)   |
| C(1)-N(1)-C(8)    | 109.37(18) |
| C(19)-N(2)-C(11)  | 124.73(16) |

## IV. Characterization Data for Products

### *N*,4-diphenyl-2,3,4,9-tetrahydro-1*H*-carbazol-3-amine (3aa)

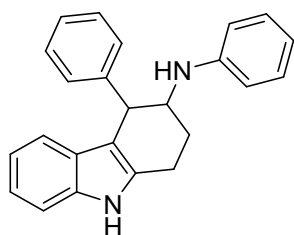

Colorless semisolid (26.4 mg, 78% yield, d.r. = 2.3:1), purified by flash chromatography using petroleum ether/ethyl acetate (10:1) as eluants. The *cis* isomer was separated by crystallization with hexane and ethyl acetate as solvents. ***cis* isomer:**  $^1\text{H NMR}$  (400

**MHz,  $\text{CDCl}_3$ )**  $\delta$  7.84 (s, 1H), 7.34 (d,  $J = 8.1$  Hz, 1H), 7.30 – 7.21 (m, 5H), 7.18 – 7.08 (m, 4H), 6.97 (t,  $J = 7.5$  Hz, 1H), 6.76 (t,  $J = 7.3$  Hz, 1H), 6.66 (d,  $J = 8.0$  Hz, 2H), 4.72 (d,  $J = 5.3$  Hz, 1H), 4.20 (q,  $J = 6.6$  Hz, 1H), 3.49 (s, 1H), 3.14 – 2.97 (m, 2H), 2.01 (h,  $J = 6.0$  Hz, 2H).  $^{13}\text{C NMR}$  (101 MHz,  $\text{CDCl}_3$ )  $\delta$  147.1, 140.1, 136.8, 134.3, 130.3, 129.6, 128.0, 127.3, 126.8, 121.6, 119.5, 118.5, 117.3, 113.5, 111.7, 110.5, 52.4, 41.0, 24.7, 23.0. **HRMS (ESI)  $m/z$   $[\text{M} + \text{H}]^+$  calcd for  $\text{C}_{24}\text{H}_{22}\text{N}_2$  339.1856; found 339.1865.**

### 7-methyl-*N*,4-diphenyl-2,3,4,9-tetrahydro-1*H*-carbazol-3-amine (3ba)

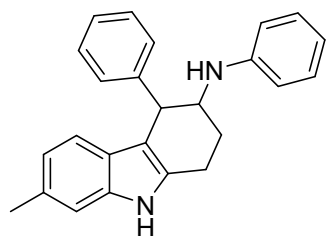

Colorless semisolid (27.5 mg, 78% yield, d.r. = 1.4:1), purified by flash chromatography using petroleum ether/ethyl acetate (10:1) as eluants. The *cis* isomer was separated by crystallization with hexane and ethyl acetate solvents. (14.1 mg, 40% yield).

***cis* isomer:**  $^1\text{H NMR}$  (400 MHz,  $\text{CDCl}_3$ )  $\delta$  7.75 (s, 1H), 7.31 (s, 2H), 7.25 (d,  $J = 8.3$  Hz, 3H), 7.14 (d,  $J = 4.7$  Hz, 3H), 6.99 (d,  $J = 7.9$  Hz, 1H), 6.83 – 6.74 (m, 2H), 6.67 (d,  $J = 7.8$  Hz, 2H), 4.69 (d,  $J = 5.3$  Hz, 1H), 4.20 (q,  $J = 6.8$  Hz, 1H), 3.06 (q,  $J = 7.0, 4.5$  Hz, 2H), 2.46 (s, 3H), 2.08 – 1.97 (m, 2H).  $^{13}\text{C NMR}$  (151 MHz,  $\text{CDCl}_3$ )  $\delta$  140.2, 137.3, 133.6, 131.4, 130.3, 129.6, 128.0, 126.8, 125.2, 121.2, 118.2, 117.5, 113.7, 111.6, 110.7, 52.6, 41.2, 24.8, 23.0, 21.8. **HRMS (ESI)  $m/z$   $[\text{M} + \text{H}]^+$  calcd for  $\text{C}_{25}\text{H}_{24}\text{N}_2$  353.2012; found 353.2022.**

### 7-chloro-*N*,4-diphenyl-2,3,4,9-tetrahydro-1*H*-carbazol-3-amine (3ca)

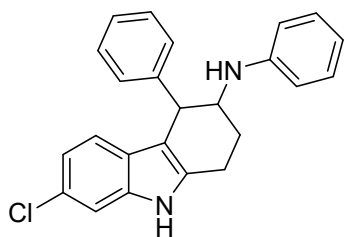

Colorless semisolid (28.6 mg, 77% yield, d.r. = 1.8:1), purified by flash chromatography using petroleum ether/ethyl acetate (10:1) as eluants. The *cis* isomer was separated by crystallization with hexane and ethyl acetate as solvents. *cis*

**isomer:**  $^1\text{H NMR}$  (400 MHz,  $\text{CDCl}_3$ )  $\delta$  7.85 (s, 1H), 7.30 (d,  $J = 9.4$  Hz, 3H), 7.22 (d,  $J = 7.5$  Hz, 3H), 7.08 (dd,  $J = 6.8, 2.9$  Hz, 2H), 6.98 (d,  $J = 8.4$  Hz, 1H), 6.95 – 6.90 (m, 1H), 6.76 (t,  $J = 7.3$  Hz, 1H), 6.65 (d,  $J = 8.0$  Hz, 2H), 4.66 (d,  $J = 5.3$  Hz, 1H), 4.18 (dt,  $J = 9.7, 4.9$  Hz, 1H), 3.14 – 2.97 (m, 2H), 2.07 – 1.93 (m, 2H).  $^{13}\text{C NMR}$  (101 MHz,  $\text{CDCl}_3$ )  $\delta$  147.1, 139.9, 137.3, 135.1, 130.2, 129.6, 128.1, 127.5, 127.0, 126.1, 120.2, 119.3, 117.5, 113.6, 112.1, 110.6, 52.5, 41.1, 24.7, 23.0. **HRMS (ESI)  $m/z$   $[\text{M} + \text{H}]^+$**  calcd for  $\text{C}_{24}\text{H}_{21}\text{ClN}_2$  373.1466; found 373.1479.

#### ***N*,4-diphenyl-7-(trifluoromethyl)-2,3,4,9-tetrahydro-1*H*-carbazol-3-amine (3da)**

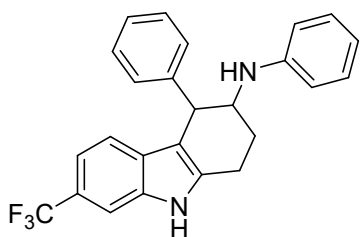

colorless semisolid (26.4 mg, 65% yield, d.r. = 1.7:1), purified by flash chromatography using petroleum ether/ethyl acetate (10:1) as eluants. The *cis* isomer was separated by crystallization with hexane and ethyl acetate as solvents. *cis*

**isomer:**  $^1\text{H NMR}$  (400 MHz,  $\text{CDCl}_3$ )  $\delta$  8.09 (s, 1H), 7.58 (s, 1H), 7.26 – 7.10 (m, 7H), 7.04 (dd,  $J = 6.6, 2.9$  Hz, 2H), 6.73 (t,  $J = 7.3$  Hz, 1H), 6.63 (d,  $J = 8.0$  Hz, 2H), 4.68 (d,  $J = 5.3$  Hz, 1H), 4.17 (m, 1H), 3.18 – 2.94 (m, 2H), 2.09 – 1.84 (m, 2H).  $^{13}\text{C NMR}$  (101 MHz,  $\text{CDCl}_3$ )  $\delta$  146.9, 139.7, 137.3, 135.7, 130.1, 129.7, 129.5, 128.7, 128.1, 127.1, 123.6 (q, C-F,  $^2J_{\text{C-F}} = 31.6$  Hz), 118.7, 117.5, 116.4, 113.5, 112.3, 108.0, 108.0, 52.2, 40.8, 24.5, 23.0. **HRMS (ESI)  $m/z$   $[\text{M} + \text{H}]^+$**  calcd for  $\text{C}_{25}\text{H}_{21}\text{F}_3\text{N}_2$  407.1730; found 407.1742.

### 6-methyl-*N*,4-diphenyl-2,3,4,9-tetrahydro-1*H*-carbazol-3-amine (3ea)

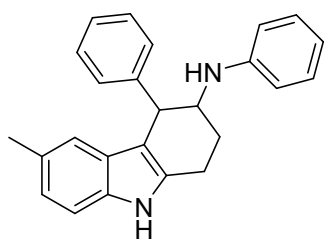

Colorless semisolid (27.4 mg, 78% yield, d.r. = 3.3:1), purified by flash chromatography using petroleum ether/ethyl acetate (10:1) as eluants. The *cis* isomer was separated by crystallization with hexane and ethyl acetate as solvents. ***cis* isomer:**  $^1\text{H NMR}$

(400 MHz,  $\text{CDCl}_3$ )  $\delta$  7.73 (s, 1H), 7.25 – 7.16 (m, 6H), 7.12 – 7.05 (m, 2H), 6.91 (dd,  $J = 8.2, 1.6$  Hz, 1H), 6.86 (s, 1H), 6.72 (t,  $J = 7.3$  Hz, 1H), 6.66 – 6.58 (m, 2H), 4.65 (d,  $J = 5.3$  Hz, 1H), 4.14 (q,  $J = 6.4$  Hz, 1H), 3.11 – 2.92 (m, 2H), 2.28 (s, 3H), 1.97 (dd,  $J = 7.7, 5.0$  Hz, 2H).  $^{13}\text{C NMR}$  (101 MHz,  $\text{CDCl}_3$ )  $\delta$  147.2, 140.3, 135.2, 134.4, 130.3, 129.6, 128.7, 128.0, 127.7, 126.8, 123.2, 118.3, 117.4, 113.6, 111.5, 110.2, 52.6, 41.1, 24.8, 23.1, 21.5. **HRMS (ESI)  $m/z$   $[\text{M} + \text{H}]^+$**  calcd for  $\text{C}_{25}\text{H}_{24}\text{N}_2$  353.2012; found 353.2025.

### 6-(*tert*-butyl)-*N*,4-diphenyl-2,3,4,9-tetrahydro-1*H*-carbazol-3-amine (3fa)

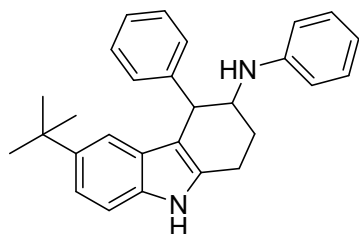

Colorless semisolid (31.5 mg, 80% yield, d.r. = 1.5:1), purified by flash chromatography using petroleum ether/ethyl acetate (8:1) as eluants. The *cis* isomer was separated by crystallization with hexane and ethyl acetate as solvents. ***cis***

**isomer:**  $^1\text{H NMR}$  (400 MHz,  $\text{CDCl}_3$ )  $\delta$  7.78 (s, 1H), 7.32 – 7.28 (m, 1H), 7.26 – 7.22 (m, 4H), 7.22 – 7.11 (m, 4H), 6.89 (d,  $J = 1.8$  Hz, 1H), 6.70 (t,  $J = 7.3$  Hz, 1H), 6.63 (d,  $J = 8.0$  Hz, 2H), 4.30 (d,  $J = 4.1$  Hz, 1H), 3.96 (ddd,  $J = 6.7, 4.4, 2.4$  Hz, 1H), 2.88 (t,  $J = 6.5$  Hz, 2H), 2.17 (m, 1H), 2.01 (m, 1H), 1.21 (s, 9H).  $^{13}\text{C NMR}$  (101 MHz,  $\text{CDCl}_3$ )  $\delta$  143.5, 142.5, 134.7, 134.3, 129.5, 128.8, 128.5, 127.7, 126.6, 119.7, 117.6, 115.0, 113.8, 110.0, 109.8, 56.1, 45.8, 34.6, 32.0, 23.6, 19.9. **HRMS (ESI)  $m/z$   $[\text{M} + \text{H}]^+$**  calcd for  $\text{C}_{28}\text{H}_{30}\text{N}_2$  395.2482; found 395.2498.

### 6-fluoro-*N*,4-diphenyl-2,3,4,9-tetrahydro-1*H*-carbazol-3-amine (3ga)

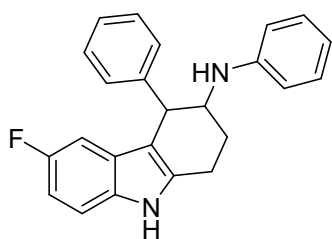

Colorless semisolid (25.6 mg, 72% yield, d.r. = 2.3:1), purified by flash chromatography using petroleum ether/ethyl acetate (10:1) as eluants. The *cis* isomer was separated by crystallization with hexane and ethyl acetate as solvents. ***cis* isomer:**  $^1\text{H NMR}$

(400 MHz,  $\text{CDCl}_3$ )  $\delta$  7.88 (s, 1H), 7.33 – 7.18 (m, 6H), 7.11 – 7.05 (m, 2H), 6.85 (m, 1H), 6.80 – 6.70 (m, 2H), 6.64 (d,  $J = 8.0$  Hz, 2H), 4.63 (d,  $J = 5.4$  Hz, 1H), 4.18 (m, 1H), 3.46 (s, 1H), 3.16 – 2.98 (m, 2H), 2.00 (m, 2H).  $^{13}\text{C NMR}$  (101 MHz,  $\text{CDCl}_3$ )  $\delta$  147.1, 139.9, 136.3, 133.3, 130.3, 129.7, 128.2, 127.1, 117.6, 113.7, 111.0 (d, C-F,  $^3J_{\text{C-F}} = 9.5$  Hz), 109.7 (d, C-F,  $^2J_{\text{C-F}} = 26.1$  Hz), 103.8 (d, C-F,  $^2J_{\text{C-F}} = 23.5$  Hz), 52.5, 41.2, 24.8, 23.1. **HRMS (ESI)  $m/z$   $[\text{M} + \text{H}]^+$**  calcd for  $\text{C}_{24}\text{H}_{21}\text{FN}_2$  357.1762; found 357.1775.

### 6-chloro-*N*,4-diphenyl-2,3,4,9-tetrahydro-1*H*-carbazol-3-amine (3ha)

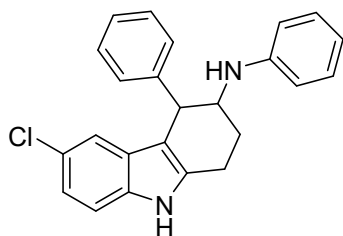

Colorless semisolid (27.9 mg, 75% yield, d.r. = 1.9:1), purified by flash chromatography using petroleum ether/ethyl acetate (10:1) as eluants. The *cis* isomer was separated by crystallization with hexane and ethyl acetate as solvents. ***cis***

**isomer:**  $^1\text{H NMR}$  (400 MHz,  $\text{CDCl}_3$ )  $\delta$  7.83 (s, 1H), 7.25 – 7.18 (m, 6H), 7.05 (m,  $J = 7.4$ , 2.3 Hz, 4H), 6.74 (t,  $J = 7.3$  Hz, 1H), 6.62 (d,  $J = 7.9$  Hz, 2H), 4.62 (d,  $J = 5.4$  Hz, 1H), 4.15 (q,  $J = 7.6$ , 7.1 Hz, 1H), 3.39 (d,  $J = 8.8$  Hz, 1H), 3.10 – 2.94 (m, 2H), 1.97 (m,  $J = 10.3$ , 9.0, 5.9 Hz, 2H).  $^{13}\text{C NMR}$  (101 MHz,  $\text{CDCl}_3$ )  $\delta$  147.1, 139.8, 135.9, 135.2, 130.2, 129.6, 128.6, 128.1, 127.1, 125.3, 121.9, 118.0, 117.5, 113.6, 111.8, 111.5, 52.4, 41.0, 24.6, 23.0. **HRMS (ESI)  $m/z$   $[\text{M} + \text{H}]^+$**  calcd for  $\text{C}_{24}\text{H}_{21}\text{ClN}_2$  373.1466; found 373.1480.



#### 4-phenyl-3-(phenylamino)-2,3,4,9-tetrahydro-1*H*-carbazole-6-carbonitrile (3ia)

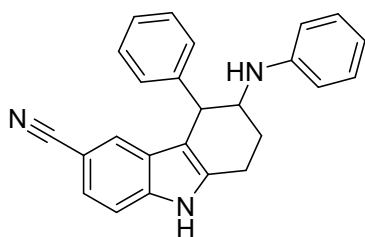

Colorless semisolid (18.9 mg, 52% yield, d.r. = 1.3:1), purified by flash chromatography using petroleum ether/ethyl acetate, (8:1) as eluants. The *cis* isomer was separated by crystallization with hexane and ethyl acetate as solvents. *cis*

**isomer:**  $^1\text{H NMR}$  (600 MHz,  $\text{CDCl}_3$ )  $\delta$  8.21 (s, 1H), 7.38 (s, 1H), 7.35 – 7.32 (m, 2H), 7.25 (d,  $J = 3.4$  Hz, 3H), 7.21 (dd,  $J = 8.5, 7.3$  Hz, 2H), 7.04 (dd,  $J = 6.6, 3.0$  Hz, 2H), 6.79 (t,  $J = 7.3$  Hz, 1H), 6.67 (d,  $J = 7.9$  Hz, 2H), 4.66 (d,  $J = 5.4$  Hz, 1H), 4.15 (m, 1H), 3.05 (m, 2H), 2.08 – 2.01 (m, 2H).  $^{13}\text{C NMR}$  (101 MHz,  $\text{CDCl}_3$ )  $\delta$  146.8, 139.3, 138.5, 136.8, 130.06, 129.7, 128.3, 127.3, 127.2, 124.9, 123.9, 117.6, 113.5, 112.8, 111.3, 102.6, 52.2, 40.7, 24.5, 22.9. **HRMS (ESI)  $m/z$   $[\text{M} + \text{H}]^+$**  calcd for  $\text{C}_{25}\text{H}_{21}\text{N}_3$  364.1808; found 364.1821.

#### 8-methyl-*N*,4-diphenyl-2,3,4,9-tetrahydro-1*H*-carbazol-3-amine (3ja)

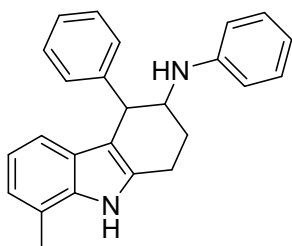

Colorless oil (23.9mg, 68% yield, d.r. = 2.5:1), purified by flash chromatography using petroleum ether/ethyl acetate (10:1) as eluants.  $^1\text{H NMR}$  (*cis* isomer, 400 MHz,  $\text{CDCl}_3$ )  $\delta$  7.83 (s, 1H), 7.24 (m, 4H), 7.12 (d,  $J = 6.6$  Hz, 2H), 6.96 (d,  $J = 8.2$  Hz, 2H),

6.94 – 6.86 (m, 2H), 6.75 (q,  $J = 7.8$  Hz, 1H), 6.66 (d,  $J = 7.9$  Hz, 2H), 4.71 (d,  $J = 5.4$  Hz, 1H), 4.19 (q,  $J = 6.9$  Hz, 1H), 3.09 (q,  $J = 6.2, 4.0$  Hz, 2H), 2.54 (d,  $J = 4.3$  Hz, 3H), 2.02 (d,  $J = 6.7$  Hz, 2H).  $^{13}\text{C NMR}$  (101 MHz,  $\text{CDCl}_3$ )  $\delta$  171.4, 147.4, 147.1, 143.6, 140.2, 136.2, 135.9, 134.0, 133.9, 130.3, 129.6, 129.5, 128.6, 128.5, 128.0, 127.3, 126.8, 126.8, 126.6, 122.3, 119.7, 119.6, 117.4, 117.3, 116.6, 116.2, 113.6, 113.5, 112.2, 109.9, 60.6, 55.6, 52.4, 45.4, 41.1, 24.7, 23.01, 22.8, 21.2, 19.5, 16.8, 14.3. **HRMS (ESI)  $m/z$   $[\text{M} + \text{H}]^+$**  calcd for  $\text{C}_{25}\text{H}_{24}\text{N}_2$  353.2012; found 353.2022.

### 6,8-dimethyl-*N*,4-diphenyl-2,3,4,9-tetrahydro-1*H*-carbazol-3-amine (3ka)

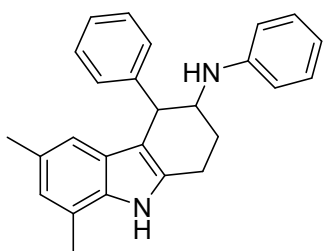

Colorless oil (24.8mg, 68% yield, d.r. = 2.1:1), purified by flash chromatography using petroleum ether/ethyl acetate (10:1) as eluants.  $^1\text{H NMR}$  (*cis* isomer, 400 MHz,  $\text{CDCl}_3$ )  $\delta$  7.69 (d,  $J = 8.3$  Hz, 1H), 7.31 – 7.21 (m, 7H), 7.06 (d,  $J = 7.2$  Hz, 1H), 6.74 (m, 4H), 4.72 – 4.57 (m, 1H), 4.17 – 4.06 (m, 1H), 3.04 (q,  $J = 8.2$  Hz, 2H), 2.57 – 2.39 (m, 3H), 2.28 – 2.20 (m, 3H), 2.00 – 1.90 (m, 2H).  $^{13}\text{C NMR}$  (151 MHz,  $\text{CDCl}_3$ )  $\delta$  147.5, 147.2, 140.3, 134.6, 134.3, 134.1, 134.0, 130.3, 129.6, 129.5, 129.0, 129.0, 128.7, 128.5, 128.0, 127.7, 127.2, 126.7, 126.5, 124.1, 119.4, 119.3, 117.4, 117.3, 116.2, 115.9, 113.6, 113.5, 111.9, 109.3, 60.6, 55.5, 52.5, 45.2, 41.1, 29.8, 24.7, 23.1, 22.3, 21.4, 19.3, 16.7. **HRMS (ESI)**  $m/z$   $[\text{M} + \text{H}]^+$  calcd for  $\text{C}_{26}\text{H}_{26}\text{N}_2$  367.2169; found 367.2181.

### 6,8-dichloro-*N*,4-diphenyl-2,3,4,9-tetrahydro-1*H*-carbazol-3-amine (3la)

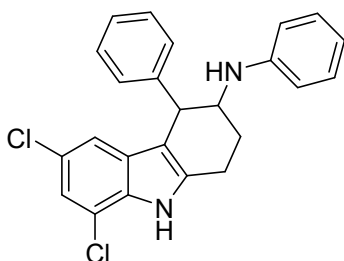

Colorless oil (27.6mg, 68% yield, d.r. = 1.9:1), purified by flash chromatography using petroleum ether/ethyl acetate (10:1) as eluants.  $^1\text{H NMR}$  (*cis* isomer, 400 MHz,  $\text{CDCl}_3$ )  $\delta$  8.18 (d,  $J = 19.7$  Hz, 1H), 7.36 – 7.22 (m, 7H), 7.11 (s, 1H), 6.96 (s, 1H), 6.75 (m, 1H), 6.63 (d,  $J = 7.7$  Hz, 2H), 4.61 (d,  $J = 5.3$  Hz, 1H), 4.20 – 4.07 (m, 1H), 3.05 (d,  $J = 6.8$  Hz, 2H), 1.99 (q,  $J = 10.7, 9.4$  Hz, 2H).  $^{13}\text{C NMR}$  (101 MHz,  $\text{CDCl}_3$ )  $\delta$  147.1, 146.8, 142.7, 139.3, 136.7, 136.4, 132.5, 132.2, 130.1, 129.6, 129.5, 129.2, 128.7, 128.5, 128.2, 127.2, 127.0, 125.2, 125.2, 121.0, 117.7, 117.5, 117.1, 116.8, 116.4, 116.3, 113.6, 113.5, 112.8, 110.7, 77.5, 55.4, 52.1, 45.2, 40.7, 24.4, 23.0, 22.8, 19.5. **HRMS (ESI)**  $m/z$   $[\text{M} + \text{H}]^+$  calcd for  $\text{C}_{24}\text{H}_{20}\text{Cl}_2\text{N}_2$  407.1076; found 407.1072.

#### ***N*-phenyl-4-(*p*-tolyl)-2,3,4,9-tetrahydro-1*H*-carbazol-3-amine (3ma)**

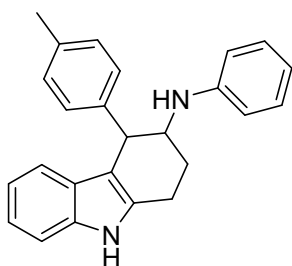

Colorless semisolid (24.9mg, 71% yield, d.r. = 1.5:1), purified by flash chromatography using petroleum ether/ethyl acetate (15:1) as eluants. The *cis* isomer was separated by crystallization with hexane and ethyl acetate as solvents. ***cis* isomer:**  $^1\text{H NMR}$  (600

**MHz,  $\text{CDCl}_3$ )**  $\delta$  7.84 (s, 1H), 7.30 (dd,  $J = 8.1, 0.9$  Hz, 1H), 7.22 – 7.17 (m, 2H), 7.09 – 7.06 (m, 2H), 7.05 – 7.01 (m, 2H), 6.97 (d,  $J = 8.1$  Hz, 2H), 6.92 (ddd,  $J = 8.0, 7.0, 1.0$  Hz, 1H), 6.73 (t,  $J = 7.3$  Hz, 1H), 6.65 (d,  $J = 7.9$  Hz, 2H), 4.64 (d,  $J = 5.3$  Hz, 1H), 4.19 – 4.05 (m, 1H), 3.08 – 2.93 (m, 2H), 2.30 (s, 3H), 1.98 (dt,  $J = 9.1, 4.2$  Hz, 2H).  $^{13}\text{C NMR}$  (151 MHz,  $\text{CDCl}_3$ )  $\delta$  147.5, 140.6, 136.1, 134.1, 129.5, 129.2, 128.5, 127.9, 121.6, 119.5, 118.9, 117.4, 113.6, 110.5, 109.7, 55.7, 45.0, 22.9, 21.2, 19.5. **HRMS (ESI)  $m/z$   $[\text{M} + \text{H}]^+$**  calcd for  $\text{C}_{25}\text{H}_{24}\text{N}_2$  353.2012; found 353.2022.

#### **4-(4-(*tert*-butyl)phenyl)-*N*-phenyl-2,3,4,9-tetrahydro-1*H*-carbazol-3-amine (3na)**

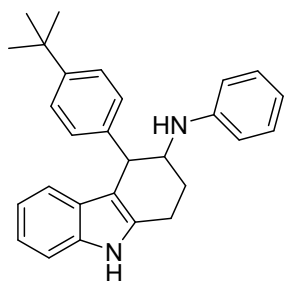

Colorless semisolid (26.4mg, 67% yield, d.r. = 7.3:1), purified by flash chromatography using petroleum ether/ethyl acetate (15:1) as eluants. The *cis* isomer was separated by crystallization with hexane and ethyl acetate as solvents. ***cis* isomer:**  $^1\text{H NMR}$  (400 MHz,

**$\text{CDCl}_3$ )**  $\delta$  7.82 (s, 1H), 7.33 (d,  $J = 8.2$  Hz, 1H), 7.31 – 7.26 (m, 2H), 7.25 – 7.19 (m, 2H), 7.14 (d,  $J = 7.6$  Hz, 2H), 7.06 – 7.02 (m, 2H), 6.97 (t,  $J = 7.4$  Hz, 1H), 6.78 – 6.72 (m, 1H), 6.68 – 6.65 (m, 2H), 4.66 (d,  $J = 5.2$  Hz, 1H), 4.21 – 4.13 (m, 1H), 3.06 (q,  $J = 6.2, 4.1$  Hz, 2H), 2.01 (dd,  $J = 7.6, 4.8$  Hz, 2H), 1.33 (s, 9H).  $^{13}\text{C NMR}$  (101 MHz,  $\text{CDCl}_3$ )  $\delta$  149.6, 147.3, 137.0, 134.2, 129.9, 129.6, 127.5, 124.9, 121.6, 119.5, 118.7, 117.3, 113.6, 112.3, 110.5, 52.6, 40.8, 34.5, 31.6, 24.8, 23.0. **HRMS (ESI)  $m/z$   $[\text{M} + \text{H}]^+$**  calcd for  $\text{C}_{28}\text{H}_{30}\text{N}_2$  395.2482; found 395.2495.

**E isomer:**  $^1\text{H NMR}$  (400 MHz,  $\text{CDCl}_3$ )  $\delta$  7.88 (s, 1H), 7.34 (d,  $J = 8.1$  Hz, 1H), 7.29 (d,  $J = 8.1$  Hz, 2H), 7.19 (t,  $J = 7.7$  Hz, 2H), 7.13 (d,  $J = 8.2$  Hz, 3H), 7.06 (d,  $J = 7.8$  Hz, 1H), 6.95 (t,  $J = 7.5$  Hz, 1H), 6.71 (t,  $J = 7.3$  Hz, 1H), 6.64 (d,  $J = 8.0$  Hz, 2H), 4.33 (d,  $J = 3.3$  Hz, 1H), 3.99 (p,  $J = 2.7$  Hz, 1H), 2.87 (t,  $J = 6.3$  Hz, 2H), 2.15 – 1.97 (m, 2H), 1.31 (s, 9H).  $^{13}\text{C NMR}$  (101 MHz,  $\text{CDCl}_3$ )  $\delta$  149.2, 147.4, 140.4, 136.4, 134.1, 129.4, 128.1, 127.9, 125.3, 121.5, 119.4, 118.9, 117.3, 113.5, 110.5, 109.5, 55.2, 44.6, 34.5, 31.5, 22.3, 19.2.

#### 4-([1,1'-biphenyl]-4-yl)-*N*-phenyl-2,3,4,9-tetrahydro-1*H*-carbazol-3-amine (30a)

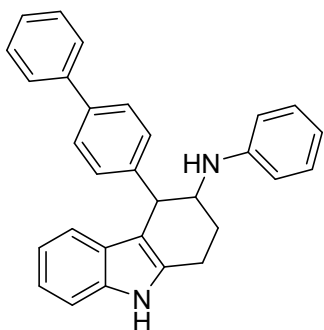

Colorless oil (24.8mg, 60% yield, d.r. = 1.9:1), purified by flash chromatography using petroleum ether/ethyl acetate (8:1) as eluants.  $^1\text{H NMR}$  (*cis* isomer, 400 MHz,  $\text{CDCl}_3$ )  $\delta$  7.89 (s, 1H), 7.61 (d,  $J = 7.7$  Hz, 2H), 7.54 – 7.42 (m, 4H), 7.37 (d,  $J = 7.8$  Hz, 2H), 7.25 (t,  $J = 7.8$  Hz, 2H), 7.18 (t,  $J = 7.3$  Hz, 4H), 6.99 (t,  $J = 7.6$  Hz, 1H), 6.77 (t,  $J = 7.4$  Hz, 1H), 6.69 (d,  $J = 8.0$  Hz, 2H), 4.77 (d,  $J = 5.2$  Hz, 1H), 4.23 (q,  $J = 6.7$  Hz, 1H), 3.10 (q,  $J = 6.2, 4.0$  Hz, 2H), 2.06 (q,  $J = 8.7, 6.5$  Hz, 2H).  $^{13}\text{C NMR}$  (101 MHz,  $\text{CDCl}_3$ )  $\delta$  147.1, 141.0, 139.5, 139.3, 136.8, 134.4, 130.7, 129.6, 128.9, 127.3, 127.2, 127.1, 126.7, 121.7, 119.5, 118.5, 117.4, 113.6, 111.7, 110.6, 52.5, 40.6, 24.8, 23.0. **HRMS (ESI)  $m/z$   $[\text{M} + \text{H}]^+$**  calcd for  $\text{C}_{30}\text{H}_{26}\text{N}_2$  415.2169; found 415.2182.

#### 4-(4-chlorophenyl)-*N*-phenyl-2,3,4,9-tetrahydro-1*H*-carbazol-3-amine (3pa)

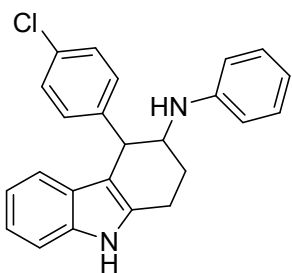

Colorless semisolid (24.8mg, 67% yield, d.r. = 1.4:1), purified by flash chromatography using petroleum ether/ethyl acetate (15:1) as eluants. The *cis* isomer was separated by crystallization with hexane and ethyl acetate as solvents. ***cis* isomer:**  $^1\text{H NMR}$  (400 MHz,  $\text{CDCl}_3$ )  $\delta$  7.85 (s, 1H), 7.31 (d,  $J = 8.1$  Hz, 1H), 7.20 (t,  $J = 8.2$  Hz, 4H), 7.11 (t,  $J =$

7.6 Hz, 1H), 7.04 (d,  $J = 7.9$  Hz, 1H), 7.01 – 6.91 (m, 3H), 6.73 (t,  $J = 7.3$  Hz, 1H), 6.66 – 6.57 (m, 2H), 4.68 (d,  $J = 5.4$  Hz, 1H), 4.15 (dt,  $J = 14.3, 5.6$  Hz, 1H), 3.09 – 2.98 (m, 2H), 2.01 – 1.88 (m, 2H).  $^{13}\text{C}$  NMR (101 MHz,  $\text{CDCl}_3$ )  $\delta$  147.0, 138.9, 137.0, 134.4, 132.8, 131.6, 129.7, 128.1, 127.3, 121.9, 119.7, 118.4, 117.6, 113.6, 111.5, 110.6, 52.5, 40.5, 25.0, 23.0. HRMS (ESI)  $m/z$   $[\text{M} + \text{H}]^+$  calcd for  $\text{C}_{24}\text{H}_{21}\text{ClN}_2$  373.1466; found 373.1479.

#### 4-(3-(phenylamino)-2,3,4,9-tetrahydro-1H-carbazol-4-yl)phenyl acetate (3qa)

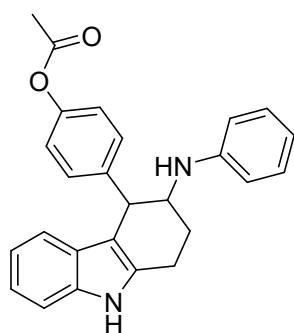

Colorless semisolid (24.5mg, 62% yield, d.r. = 1:1), purified by flash chromatography using petroleum ether/ethyl acetate (15:1) as eluants. The *cis* isomer was separated by crystallization with hexane and ethyl acetate as solvents. ***cis* isomer:**  $^1\text{H}$  NMR (400 MHz,  $\text{CDCl}_3$ )  $\delta$  7.84 (s, 1H), 7.30 (d,  $J = 8.1$  Hz, 1H), 7.20 (t,  $J = 7.8$  Hz, 2H), 7.08 (m, 4H), 6.94 (m, 3H), 6.73 (t,  $J = 7.4$  Hz, 1H), 6.64 (d,  $J = 7.9$  Hz, 2H), 4.70 (d,  $J = 5.2$  Hz, 1H), 4.22 – 4.09 (m, 1H), 3.03 (m, 2H), 2.27 (s, 3H), 1.96 (m, 2H).  $^{13}\text{C}$  NMR (101 MHz,  $\text{CDCl}_3$ )  $\delta$  169.5, 149.7, 146.9, 137.7, 136.9, 134.3, 131.1, 129.7, 127.3, 121.8, 120.9, 119.7, 118.5, 117.6, 113.7, 111.7, 110.6, 52.7, 40.4, 24.8, 23.1, 21.3. HRMS (ESI)  $m/z$   $[\text{M} + \text{H}]^+$  calcd for  $\text{C}_{26}\text{H}_{24}\text{N}_2\text{O}_2$  397.1911; found 397.1924.

#### 4-(2-chlorophenyl)-N-phenyl-2,3,4,9-tetrahydro-1H-carbazol-3-amine (3ra)

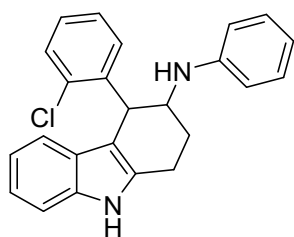

Colorless semisolid (23.8mg, 64% yield, d.r. = 13:1), purified by flash chromatography using petroleum ether/ethyl acetate (8:1) as eluants. The *cis* isomer was separated by crystallization with hexane and ethyl acetate as solvents. ***cis* isomer:**  $^1\text{H}$  NMR (600 MHz,  $\text{CDCl}_3$ )  $\delta$  7.86 (s, 1H), 7.43 (dd,  $J = 8.0, 1.2$  Hz, 1H), 7.31 (d,  $J = 8.2$  Hz, 1H), 7.18 – 7.05 (m, 6H), 6.96 – 6.87 (m, 2H), 6.68 – 6.61 (m, 1H), 6.58 – 6.49 (m, 2H), 5.24 (d,  $J = 5.3$

Hz, 1H), 4.31 (ddd,  $J = 8.5, 5.4, 2.6$  Hz, 1H), 3.04 (dtd,  $J = 16.8, 6.0, 1.3$  Hz, 1H), 2.94 (dddd,  $J = 16.7, 7.6, 6.2, 1.4$  Hz, 1H), 2.34 – 2.22 (m, 1H), 2.11 (dtd,  $J = 13.1, 6.1, 2.6$  Hz, 1H).  $^{13}\text{C}$  NMR (151 MHz,  $\text{CDCl}_3$ )  $\delta$  147.4, 137.8, 136.6, 135.1, 134.6, 131.9, 129.7, 129.3, 128.1, 127.1, 126.5, 121.7, 119.5, 119.2, 117.3, 113.4, 110.6, 110.5, 51.8, 39.5, 25.6, 21.1. HRMS (ESI)  $m/z$   $[\text{M} + \text{H}]^+$  calcd for  $\text{C}_{24}\text{H}_{21}\text{ClN}_2$  373.1466; found 373.1478.

#### 4-(3-chlorophenyl)-*N*-phenyl-2,3,4,9-tetrahydro-1*H*-carbazol-3-amine (3sa)

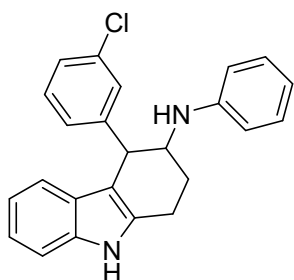

Yellow semisolid (22.3mg, 60% yield, d.r. = 6.7:1), purified by flash chromatography using petroleum ether/ethyl acetate (8:1) as eluants. The *cis* isomer was separated by crystallization with hexane and ethyl acetate as solvents. ***cis* isomer:**  $^1\text{H}$  NMR (400

MHz,  $\text{CDCl}_3$ )  $\delta$  7.82 (s, 1H), 7.32 (d,  $J = 8.0$  Hz, 1H), 7.25 – 7.06 (m, 7H), 7.00 – 6.95 (m, 2H), 6.75 (t,  $J = 7.3$  Hz, 1H), 6.64 (d,  $J = 7.9$  Hz, 2H), 4.69 (d,  $J = 5.4$  Hz, 1H), 4.24 – 4.12 (m, 1H), 3.37 (d,  $J = 9.4$  Hz, 1H), 3.12 – 2.98 (m, 2H), 2.09 – 1.89 (m, 2H).  $^{13}\text{C}$  NMR (101 MHz,  $\text{CDCl}_3$ )  $\delta$  147.0, 142.6, 137.0, 134.4, 134.1, 130.1, 129.7, 129.1, 128.6, 127.3, 127.1, 121.8, 119.7, 118.4, 117.7, 113.7, 111.2, 110.7, 52.5, 40.9, 24.9, 22.9.

***E* isomer:**  $^1\text{H}$  NMR (400 MHz,  $\text{CDCl}_3$ )  $\delta$  7.94 (s, 1H), 7.35 (d,  $J = 8.1$  Hz, 1H), 7.23 – 7.15 (m, 5H), 7.12 (ddd,  $J = 8.4, 4.8, 2.4$  Hz, 2H), 7.02 – 6.92 (m, 2H), 6.71 (t,  $J = 7.3$  Hz, 1H), 6.62 (d,  $J = 8.1$  Hz, 2H), 4.29 (d,  $J = 3.6$  Hz, 1H), 3.94 (p,  $J = 2.9$  Hz, 1H), 2.89 (dd,  $J = 7.6, 5.1$  Hz, 2H), 2.13 – 1.99 (m, 2H).  $^{13}\text{C}$  NMR (101 MHz,  $\text{CDCl}_3$ )  $\delta$  147.1, 145.9, 136.4, 134.4, 134.3, 129.8, 129.5, 128.6, 127.5, 126.9, 121.8, 119.6, 118.7, 117.6, 113.6, 110.7, 108.7, 55.5, 45.1, 22.8, 19.4. HRMS (ESI)  $m/z$   $[\text{M} + \text{H}]^+$  calcd for  $\text{C}_{24}\text{H}_{21}\text{ClN}_2$  373.1466; found 373.1476.

#### 4-(naphthalen-2-yl)-*N*-phenyl-2,3,4,9-tetrahydro-1*H*-carbazol-3-amine (3ta)

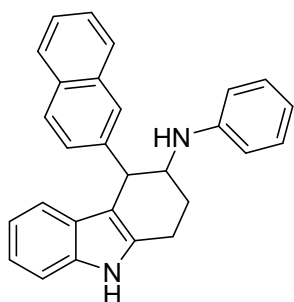

Yellow semisolid (22.3mg, 71% yield, d.r. = 1.8:1), purified by flash chromatography using petroleum ether/ethyl acetate (8:1) as eluants. The *cis* isomer was separated by crystallization with hexane and ethyl acetate as solvents. ***cis* isomer:**  $^1\text{H NMR}$  (400

**MHz,  $\text{CDCl}_3$ )**  $\delta$  7.89 (s, 1H), 7.73 – 7.57 (m, 3H), 7.44 – 7.29 (m, 2H), 7.25 – 7.18 (m, 4H), 7.15 – 7.04 (m, 4H), 6.95 (d,  $J = 6.5$  Hz, 2H), 6.78 (dd,  $J = 8.7, 2.0$  Hz, 1H), 4.80 (d,  $J = 5.3$  Hz, 1H), 4.30 (q,  $J = 6.8$  Hz, 1H), 3.65 (s, 1H), 3.09 (qd,  $J = 16.7, 10.4$  Hz, 2H), 2.04 (h,  $J = 4.6$  Hz, 2H).  $^{13}\text{C NMR}$  (101 MHz,  $\text{CDCl}_3$ )  $\delta$  144.7, 140.1, 136.8, 135.5, 134.4, 130.3, 129.4, 128.0, 127.8, 127.6, 127.3, 126.8, 126.5, 126.0, 122.1, 121.7, 119.6, 118.6, 118.5, 111.7, 110.6, 105.1, 52.5, 40.4, 24.6, 23.1. **HRMS (ESI)  $m/z$   $[\text{M} + \text{H}]^+$**  calcd for  $\text{C}_{28}\text{H}_{24}\text{N}_2$  389.2012; found 389.2023.

#### *N*-([1,1'-biphenyl]-4-yl)-4-phenyl-2,3,4,9-tetrahydro-1*H*-carbazol-3-amine (3ab)

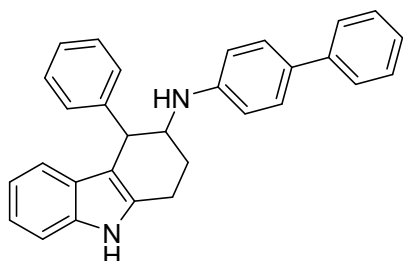

Yellow semisolid (35.2mg, 85% yield, d.r. = 2.1:1), purified by flash chromatography using petroleum ether/ethyl acetate (8:1) as eluants. The *cis* isomer was separated by crystallization with hexane and ethyl acetate

as solvents. ***cis* isomer:**  $^1\text{H NMR}$  (400 MHz,  $\text{CDCl}_3$ )  $\delta$  7.83 (s, 1H), 7.58 (d,  $J = 7.7$  Hz, 2H), 7.47 (d,  $J = 8.1$  Hz, 2H), 7.40 (t,  $J = 7.5$  Hz, 2H), 7.31 (d,  $J = 8.1$  Hz, 1H), 7.24 (s, 4H), 7.10 (m, 4H), 6.94 (t,  $J = 7.5$  Hz, 1H), 6.69 (d,  $J = 8.1$  Hz, 2H), 4.71 (d,  $J = 5.4$  Hz, 1H), 4.27 – 4.15 (m, 1H), 3.53 (d,  $J = 9.4$  Hz, 1H), 3.10 – 3.00 (m, 2H), 2.05 – 1.99 (m, 2H).  $^{13}\text{C NMR}$  (101 MHz,  $\text{CDCl}_3$ )  $\delta$  146.7, 141.4, 140.2, 137.0, 134.3, 130.3, 130.3, 128.8, 128.3, 128.1, 127.5, 126.9, 126.4, 126.2, 121.7, 119.6, 118.6, 113.8, 111.9, 11.6, 52.6, 41.4, 24.9, 23.0. **HRMS (ESI)  $m/z$   $[\text{M} + \text{H}]^+$**  calcd for  $\text{C}_{30}\text{H}_{26}\text{N}_2$  415.2169; found 415.2180.

***N*-(4-(tert-butoxy)phenyl)-4-phenyl-2,3,4,9-tetrahydro-1*H*-carbazol-3-amine (3ac)**

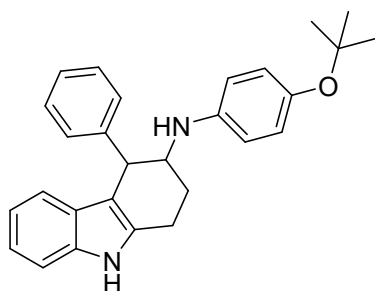

Colorless semisolid (33.6mg, 82% yield, d.r. = 5.3:1), purified by flash chromatography using petroleum ether/ethyl acetate (15:1) as eluants. The *cis* isomer was separated by crystallization with hexane and ethyl acetate as solvents. ***cis* isomer:**  $^1\text{H NMR}$  (400 MHz,  $\text{CDCl}_3$ )  $\delta$  7.85 (s, 1H), 7.30 (d,  $J = 8.2$  Hz, 1H), 7.21 (d,  $J = 5.0$  Hz, 3H), 7.08 (q,  $J = 6.0$  Hz, 4H), 6.92 (t,  $J = 7.4$  Hz, 1H), 6.89 – 6.83 (m, 2H), 6.53 (d,  $J = 7.5$  Hz, 2H), 4.68 (d,  $J = 5.5$  Hz, 1H), 4.13 – 4.06 (m, 1H), 3.02 (d,  $J = 9.3$  Hz, 2H), 2.07 – 1.87 (m, 2H), 1.33 – 1.31 (s, 9H).  $^{13}\text{C NMR}$  (101 MHz,  $\text{CDCl}_3$ )  $\delta$  140.2, 136.9, 134.3, 130.3, 128.1, 127.5, 126.9, 125.7, 121.7, 119.6, 118.6, 114.2, 112.0, 110.5, 53.4, 41.2, 29.0, 26.6, 24.8, 23.0. **HRMS (ESI)  $m/z$   $[\text{M} + \text{H}]^+$**  calcd for  $\text{C}_{28}\text{H}_{30}\text{N}_2\text{O}$  411.2431; found 411.2442.

***N*-(4-methoxyphenyl)-4-phenyl-2,3,4,9-tetrahydro-1*H*-carbazol-3-amine (3ad)**

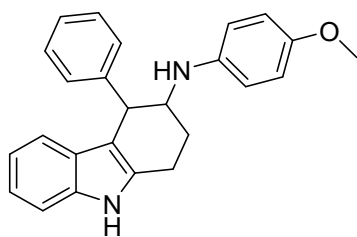

Colorless semisolid (28.7mg, 78% yield, d.r. = 2.4:1), purified by flash chromatography using petroleum ether/ethyl acetate (15:1) as eluants. The *cis* isomer was separated by crystallization with hexane and ethyl acetate as solvents. ***cis* isomer:**  $^1\text{H NMR}$  (400 MHz,  $\text{CDCl}_3$ )  $\delta$  7.83 (s, 1H), 7.31 (d,  $J = 8.1$  Hz, 1H), 7.24 (d,  $J = 7.1$  Hz, 3H), 7.10 (q,  $J = 7.7$  Hz, 5H), 6.93 (t,  $J = 7.6$  Hz, 1H), 6.30 (d,  $J = 8.3$  Hz, 1H), 6.23 (d,  $J = 8.3$  Hz, 1H), 6.19 (s, 1H), 4.68 (d,  $J = 5.4$  Hz, 1H), 4.20 – 4.09 (m, 1H), 3.78 (s, 3H), 3.45 (d,  $J = 9.8$  Hz, 1H), 3.03 (q,  $J = 6.5$  Hz, 2H), 1.99 (t,  $J = 6.9$  Hz, 2H).  $^{13}\text{C NMR}$  (101 MHz,  $\text{CDCl}_3$ )  $\delta$  161.3, 148.6, 140.2, 136.9, 134.3, 130.3, 128.0, 127.4, 126.9, 121.7, 119.6, 118.6, 111.9, 110.5, 106.7, 102.6, 99.6, 55.3, 52.6, 41.3, 24.9, 23.0. **HRMS (ESI)  $m/z$   $[\text{M} + \text{H}]^+$**  calcd for  $\text{C}_{25}\text{H}_{24}\text{N}_2\text{O}$  369.1961; found 369.1972.



### ***N*-(4-chlorophenyl)-4-phenyl-2,3,4,9-tetrahydro-1*H*-carbazol-3-amine (3ae)**

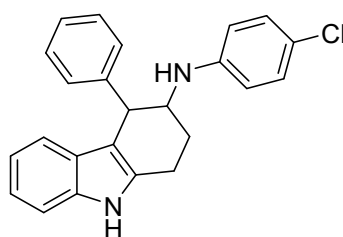

Yellow semisolid (33.4mg, 90% yield, d.r. = 1.6:1), purified by flash chromatography using petroleum ether/ethyl acetate (8:1) as eluants. The *cis* isomer was separated by crystallization with hexane and ethyl acetate as solvents. ***cis* isomer:**  $^1\text{H NMR}$  (400 MHz,  $\text{CDCl}_3$ )  $\delta$  7.86 (s, 1H), 7.34 (d,  $J = 8.2$  Hz, 1H), 7.26 (s, 3H), 7.20 – 7.07 (m, 6H), 6.97 (t,  $J = 7.5$  Hz, 1H), 6.64 – 6.51 (m, 2H), 4.69 (d,  $J = 5.2$  Hz, 1H), 4.13 (m, 1H), 3.07 (q,  $J = 6.2$  Hz, 2H), 2.10 – 1.91 (m, 2H).  $^{13}\text{C NMR}$  (101 MHz,  $\text{CDCl}_3$ )  $\delta$  145.8, 140.0, 136.9, 134.2, 130.2, 129.4, 128.1, 127.4, 127.0, 121.9, 121.8, 119.6, 118.5, 114.7, 111.7, 110.6, 52.8, 41.1, 24.8, 22.9. **HRMS (ESI)  $m/z$   $[\text{M} + \text{H}]^+$**  calcd for  $\text{C}_{24}\text{H}_{21}\text{ClN}_2$  373.1466; found 373.1478.

### **4-phenyl-*N*-(4-(trifluoromethyl)phenyl)-2,3,4,9-tetrahydro-1*H*-carbazol-3-amine (3af)**

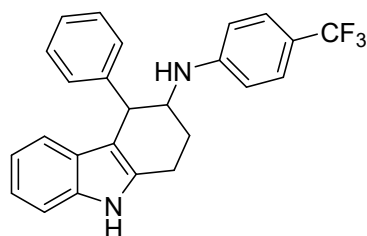

Yellow semisolid (30.4mg, 75% yield, d.r. = 4.9:1), purified by flash chromatography using petroleum ether/ethyl acetate (8:1) as eluants. The *cis* isomer was separated by crystallization with hexane and ethyl acetate as solvents. ***cis* isomer:**  $^1\text{H NMR}$  (400 MHz,  $\text{CDCl}_3$ )  $\delta$  7.90 (s, 1H), 7.42 (d,  $J = 8.4$  Hz, 2H), 7.33 (d,  $J = 8.1$  Hz, 1H), 7.23 (p,  $J = 2.9, 2.4$  Hz, 3H), 7.15 – 7.03 (m, 4H), 6.97 – 6.90 (m, 1H), 6.61 (d,  $J = 8.4$  Hz, 2H), 4.65 (d,  $J = 5.4$  Hz, 1H), 4.16 (tt,  $J = 12.3, 5.8$  Hz, 1H), 3.78 (s, 1H), 3.13 – 2.98 (m, 2H), 2.09 – 1.91 (m, 2H).  $^{13}\text{C NMR}$  (101 MHz,  $\text{CDCl}_3$ )  $\delta$  149.6, 139.8, 135.4 (q, C-F,  $^1J_{\text{C-F}} = 262.5$  Hz), 130.1, 128.2, 127.1, 127.0, 126.9 (q, C-F,  $^3J_{\text{C-F}} = 4.0$  Hz), 121.7, 120.0, 118.5, 112.4, 111.3, 110.6, 52.1, 40.9, 24.6, 22.8. **HRMS (ESI)  $m/z$   $[\text{M} + \text{H}]^+$**  calcd for  $\text{C}_{25}\text{H}_{21}\text{F}_3\text{N}_2$  407.1730; found 407.1741.

#### 4-phenyl-*N*-(*m*-tolyl)-2,3,4,9-tetrahydro-1*H*-carbazol-3-amine (3ag)

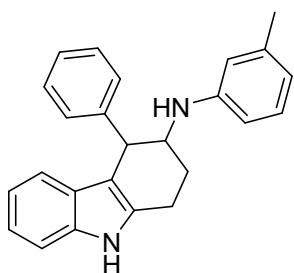

Colorless semisolid (24.6mg, 70% yield, d.r. = 1.0:1), purified by flash chromatography using petroleum ether/ethyl acetate (15:1) as eluants. The *cis* isomer was separated by crystallization with hexane and ethyl acetate as solvents. ***cis* isomer:**  $^1\text{H NMR}$  (400

**MHz,  $\text{CDCl}_3$ )**  $\delta$  7.82 (s, 1H), 7.31 (d,  $J = 8.1$  Hz, 1H), 7.24 (d,  $J = 6.5$  Hz, 3H), 7.10 (m, 5H), 6.94 (t,  $J = 7.5$  Hz, 1H), 6.55 (d,  $J = 7.5$  Hz, 1H), 6.44 (d,  $J = 9.8$  Hz, 2H), 4.67 (d,  $J = 5.4$  Hz, 1H), 4.19 – 4.12 (m, 1H), 3.37 (d,  $J = 9.0$  Hz, 1H), 3.13 – 2.97 (m, 2H), 2.29 (s, 3H), 1.98 (m, 2H).  $^{13}\text{C NMR}$  (101 MHz,  $\text{CDCl}_3$ )  $\delta$  147.3, 140.3, 139.4, 136.9, 134.4, 130.3, 129.5, 128.0, 127.5, 126.8, 121.7, 119.6, 118.6, 118.3, 114.3, 112.0, 110.8, 110.5, 52.5, 41.3, 24.9, 23.0, 21.8. **HRMS (ESI)  $m/z$   $[\text{M} + \text{H}]^+$**  calcd for  $\text{C}_{25}\text{H}_{24}\text{N}_2$  353.2012; found 353.2023.

#### *N*-(3-chlorophenyl)-4-phenyl-2,3,4,9-tetrahydro-1*H*-carbazol-3-amine (3ah)

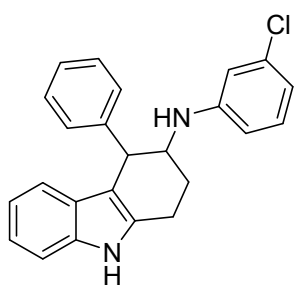

Yellow semisolid (31.2mg, 84% yield, d.r. = 1.2:1), purified by flash chromatography using (petroleum ether/ethyl acetate, 8:1) as eluants. The *cis* isomer was separated by crystallization with hexane and ethyl acetate as solvents. ***cis* isomer:**  $^1\text{H NMR}$  (400

**MHz,  $\text{CDCl}_3$ )**  $\delta$  7.82 (s, 1H), 7.31 (d,  $J = 8.0$  Hz, 1H), 7.23 (s, 3H), 7.12 – 7.05 (m, 5H), 6.93 (t,  $J = 7.4$  Hz, 1H), 6.67 (dd,  $J = 7.9, 2.0$  Hz, 1H), 6.59 (d,  $J = 2.2$  Hz, 1H), 6.45 (dd,  $J = 8.3, 2.3$  Hz, 1H), 4.65 (d,  $J = 5.4$  Hz, 1H), 4.11 (tt,  $J = 9.9, 5.6$  Hz, 1H), 3.51 (d,  $J = 9.9$  Hz, 1H), 3.20 – 2.92 (m, 2H), 2.06 – 1.89 (m, 2H).  $^{13}\text{C NMR}$  (101 MHz,  $\text{CDCl}_3$ )  $\delta$  148.5, 140.0, 136.9, 135.4, 134.2, 130.5, 130.2, 128.2, 127.4, 127.0, 121.8, 119.7, 118.6, 117.2, 113.1, 111.8, 111.7, 110.6, 52.5, 41.3, 24.8, 22.9. **HRMS (ESI)  $m/z$   $[\text{M} + \text{H}]^+$**  calcd for  $\text{C}_{24}\text{H}_{21}\text{ClN}_2$  373.1466; found 373.1444.

#### 4-phenyl-*N*-(*o*-tolyl)-2,3,4,9-tetrahydro-1*H*-carbazol-3-amine (3ai)

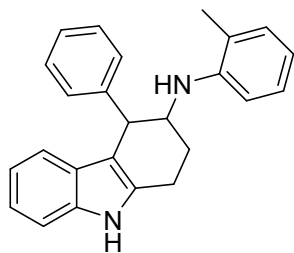

Colorless semisolid (27.4mg, 78% yield, d.r. = 2.3:1), purified by flash chromatography using petroleum ether/ethyl acetate (15:1) as eluants. The *cis* isomer was separated by crystallization with hexane and ethyl acetate as solvents. ***cis* isomer: <sup>1</sup>H NMR (400**

**MHz, CDCl<sub>3</sub>)**  $\delta$  7.86 (s, 1H), 7.35 (d,  $J$  = 8.2 Hz, 1H), 7.32 – 7.26 (m, 3H), 7.22 – 7.09 (m, 6H), 6.98 (t,  $J$  = 7.3 Hz, 1H), 6.84 (d,  $J$  = 8.2 Hz, 1H), 6.71 (t,  $J$  = 7.5 Hz, 1H), 4.74 (d,  $J$  = 5.3 Hz, 1H), 4.27 (h,  $J$  = 5.2, 4.7 Hz, 1H), 3.32 (d,  $J$  = 9.7 Hz, 1H), 3.17 – 3.00 (m, 2H), 2.14 – 1.98 (m, 2H), 1.89 (d,  $J$  = 2.3 Hz, 3H). **<sup>13</sup>C NMR (101 MHz, CDCl<sub>3</sub>)**  $\delta$  145.0, 140.3, 136.9, 134.4, 130.6, 130.1, 128.1, 127.5, 127.4, 126.9, 122.3, 121.7, 119.6, 118.6, 116.8, 111.9, 110.6, 110.3, 52.1, 41.1, 24.9, 22.9, 17.4. **HRMS (ESI)  $m/z$  [M + H]<sup>+</sup>** calcd for C<sub>25</sub>H<sub>24</sub>N<sub>2</sub> 353.2012; found 353.2022.

#### *N*-([1,1'-biphenyl]-2-yl)-4-phenyl-2,3,4,9-tetrahydro-1*H*-carbazol-3-amine (3aj)

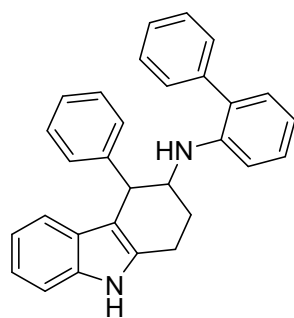

Colorless semisolid (18.6mg, 45% yield, d.r. = 99:1), purified by flash chromatography using petroleum ether/ethyl acetate (15:1) as eluants. The *cis* isomer was separated by crystallization with hexane and ethyl acetate as solvents. ***cis* isomer: <sup>1</sup>H NMR (400**

**MHz, CDCl<sub>3</sub>)**  $\delta$  7.73 (s, 1H), 7.33 – 7.28 (m, 5H), 7.19 – 7.08 (m, 8H), 7.02 – 6.93 (m, 3H), 6.90 (d,  $J$  = 8.2 Hz, 1H), 6.82 (t,  $J$  = 7.3 Hz, 1H), 4.66 (d,  $J$  = 5.5 Hz, 1H), 4.20 (m, 1H), 3.86 (d,  $J$  = 9.2 Hz, 1H), 3.05 – 2.84 (m, 2H), 2.07 – 1.87 (m, 2H). **<sup>13</sup>C NMR (101 MHz, CDCl<sub>3</sub>)**  $\delta$  144.0, 140.1, 139.4, 136.8, 134.2, 129.8, 129.3, 128.8, 128.2, 128.1, 127.4, 127.0, 126.6, 121.6, 119.5, 118.6, 116.7, 111.9, 110.8, 110.5, 52.6, 41.5, 42.6, 22.7. **HRMS (ESI)  $m/z$  [M + H]<sup>+</sup>** calcd for C<sub>30</sub>H<sub>26</sub>N<sub>2</sub> 415.2169; found 415.2181.

***N*-(3,5-dimethylphenyl)-4-phenyl-2,3,4,9-tetrahydro-1*H*-carbazol-3-amine (3ak)**

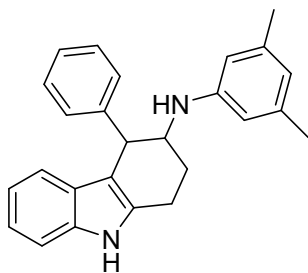

Colorless semisolid (27.4mg, 75% yield, d.r. = 1.4:1), purified by flash chromatography using petroleum ether/ethyl acetate (15:1) as eluants. The *cis* isomer was separated by crystallization with hexane and ethyl acetate as solvents. ***cis* isomer:**  $^1\text{H NMR}$  (400

**MHz,  $\text{CDCl}_3$ )**  $\delta$  7.87 (s, 1H), 7.35 (d,  $J = 8.1$  Hz, 1H), 7.28 (m, 4H), 7.13 (t,  $J = 8.6$  Hz, 4H), 6.97 (t,  $J = 7.4$  Hz, 1H), 6.42 (s, 1H), 6.30 (s, 2H), 4.69 (d,  $J = 5.3$  Hz, 1H), 4.18 (q,  $J = 6.7$  Hz, 1H), 3.08 (q,  $J = 6.8$  Hz, 2H), 2.28 (s, 6H), 2.04 – 1.97 (m, 2H).  $^{13}\text{C NMR}$  (101 MHz,  $\text{CDCl}_3$ )  $\delta$  147.2, 140.3, 139.2, 136.9, 134.4, 130.4, 128.0, 127.5, 126.8, 121.7, 119.6, 119.5, 118.6, 114.8, 111.6, 110.5, 52.6, 41.4, 24.9, 23.1, 21.7. **HRMS (ESI)  $m/z$   $[\text{M} + \text{H}]^+$**  calcd for  $\text{C}_{26}\text{H}_{26}\text{N}_2$  367.2196; found 367.2197.

***N*-(naphthalen-2-yl)-4-phenyl-2,3,4,9-tetrahydro-1*H*-carbazol-3-amine (3al)**

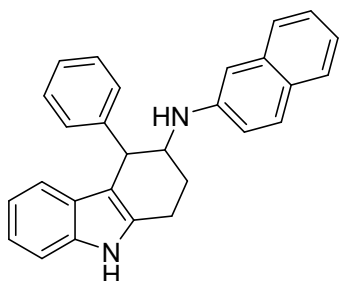

Yellow semisolid (33.3mg, 86% yield, d.r. = 2.8:1), purified by flash chromatography using petroleum ether/ethyl acetate (8:1) as eluants. The *cis* isomer was separated by crystallization with hexane and ethyl acetate as solvents. ***cis* isomer:**  $^1\text{H NMR}$

**(400 MHz,  $\text{CDCl}_3$ )**  $\delta$  7.79 (s, 1H), 7.72 (d,  $J = 8.1$  Hz, 1H), 7.66 (dd,  $J = 12.6, 8.5$  Hz, 2H), 7.40 (t,  $J = 7.5$  Hz, 1H), 7.33 (d,  $J = 8.1$  Hz, 1H), 7.28 – 7.24 (m, 4H), 7.13 (dt,  $J = 8.9, 5.3$  Hz, 4H), 6.98 (t,  $J = 3.4$  Hz, 2H), 6.80 (dt,  $J = 8.9, 1.6$  Hz, 1H), 4.82 (d,  $J = 5.4$  Hz, 1H), 4.32 (h,  $J = 6.5, 5.7$  Hz, 1H), 3.63 (d,  $J = 9.8$  Hz, 1H), 3.17 – 2.98 (m, 2H), 2.07 (h,  $J = 4.6$  Hz, 2H).  $^{13}\text{C NMR}$  (101 MHz,  $\text{CDCl}_3$ )  $\delta$  144.9, 140.2, 136.9, 135.6, 134.4, 130.3, 129.3, 128.0, 127.8, 127.7, 127.5, 126.9, 126.5, 126.0, 122.1, 121.7, 119.6, 118.6, 118.5, 111.8, 110.6, 105.3, 52.6, 40.8, 24.8, 23.0. **HRMS (ESI)  $m/z$   $[\text{M} + \text{H}]^+$**  calcd for  $\text{C}_{28}\text{H}_{24}\text{N}_2$

389.2012; found 389.2023.

**4-phenyl-N-(pyridin-2-yl)-2,3,4,9-tetrahydro-1H-carbazol-3-amine (3am)**

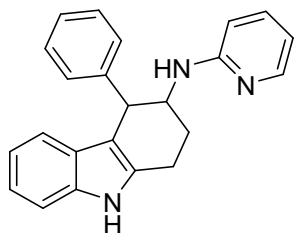

Yellow semisolid (18.3mg, 54% yield, d.r. = 1.0:1), purified by flash chromatography using petroleum ether/ethyl acetate (8:1) as eluants. The *cis* isomer was separated by crystallization with hexane and ethyl acetate as solvents. ***cis* isomer:**  $^1\text{H NMR}$  (400

**MHz,  $\text{CDCl}_3$ )**  $\delta$  8.09 (d,  $J = 5.0$  Hz, 1H), 7.96 (s, 1H), 7.46 – 7.36 (m, 1H), 7.30 (d,  $J = 8.1$  Hz, 1H), 7.22 (d,  $J = 7.3$  Hz, 3H), 7.12 – 7.00 (m, 4H), 6.91 (t,  $J = 7.4$  Hz, 1H), 6.57 (dd,  $J = 7.1, 5.1$  Hz, 1H), 6.34 (d,  $J = 8.4$  Hz, 1H), 4.64 (d,  $J = 5.5$  Hz, 1H), 4.54 (dd,  $J = 10.8, 6.5$  Hz, 1H), 4.28 (s, 1H), 3.17 – 2.94 (m, 2H), 2.00 (pt,  $J = 9.4, 4.5$  Hz, 2H).  $^{13}\text{C NMR}$  (101 **MHz,  $\text{CDCl}_3$ )**  $\delta$  157.9, 140.3, 137.7, 136.7, 134.3, 130.1, 128.2, 127.3, 126.9, 121.5, 119.4, 118.6, 112.8, 111.5, 110.5, 107.9, 50.8, 41.6, 24.9, 22.7. **HRMS (ESI)  $m/z$   $[\text{M} + \text{H}]^+$**  calcd for  $\text{C}_{23}\text{H}_{21}\text{N}_3$  340.1808; found 340.1818.

## V. References

1. Drennhaus, T.; Leifert, D.; Lammert, J., et al. Enantioselective Copper-Catalyzed Fukuyama Indole Synthesis from 2-Vinylphenyl Isocyanides. *J. Am. Chem. Soc.* **2023**, *145(15)*, 8665-8676.
2. Wang, C. H.; Li, Y. H.; Yang, S. D. Autoxidation Photoredox Catalysis for the Synthesis of 2-Phosphinoylindoles. *Org. Lett.* **2018**, *20(8)*, 2382-2385.
3. Hu, Z.; Dong, J.; Li, Z., et al. Metal-Free Triple Annulation of Ene-Yne-Ketones with Isocyanides: Domino Access to Furan-Fused Heterocycles via Furoketenimine. *Org. Lett.* **2018**, *20(21)*, 6750-6754.
4. Yoshihisa, K. and Thru, F. Development of a Novel Indole Synthesis and Its Application to Natural Products Synthesis. *J. Heterocyclic Chem.* **1998**, *35*, 1043-1055.
5. Kuang, Y.; Ning, Y.; Zhu, J., et al. Dirhodium(II)-Catalyzed (3 + 2) Cycloaddition of the N-Arylamino-cyclopropane with Alkene Derivatives. *Org. Lett.* **2018**, *20(9)*, 2693-2697.
6. Pei, C.; Liu, Y.; Chen, X.; et al. Visible-Light-Induced Oxidative Carboazidation of Arylacrylamides. *Adv. Synth. Catal.* **2023**, *365*, 860-864.

## VI. NMR Spectra of All Compound

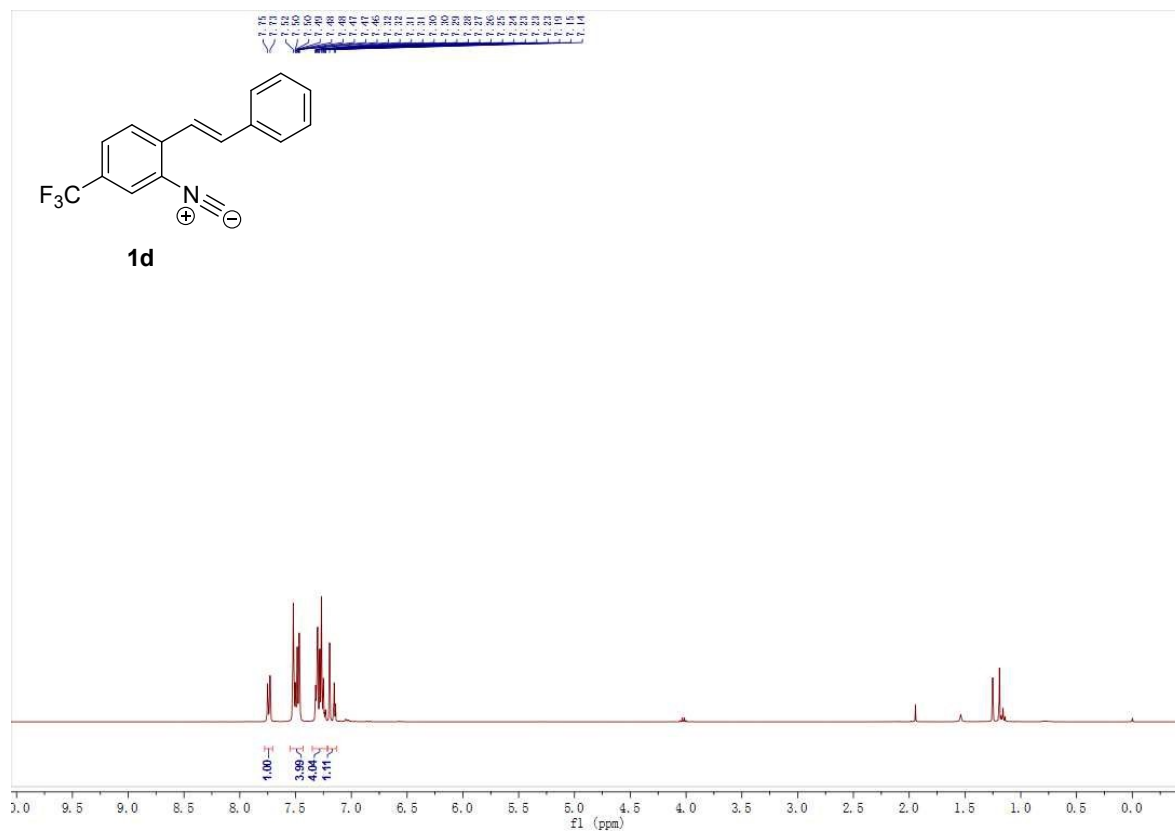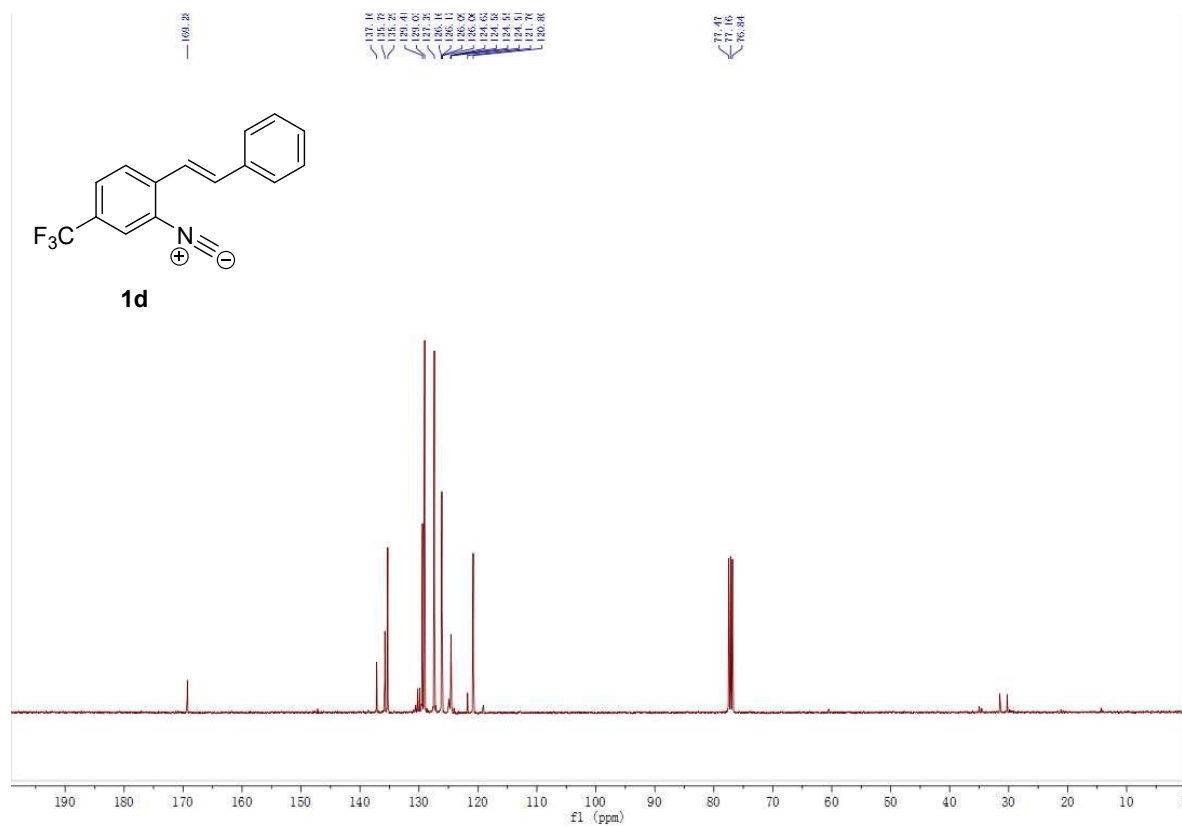

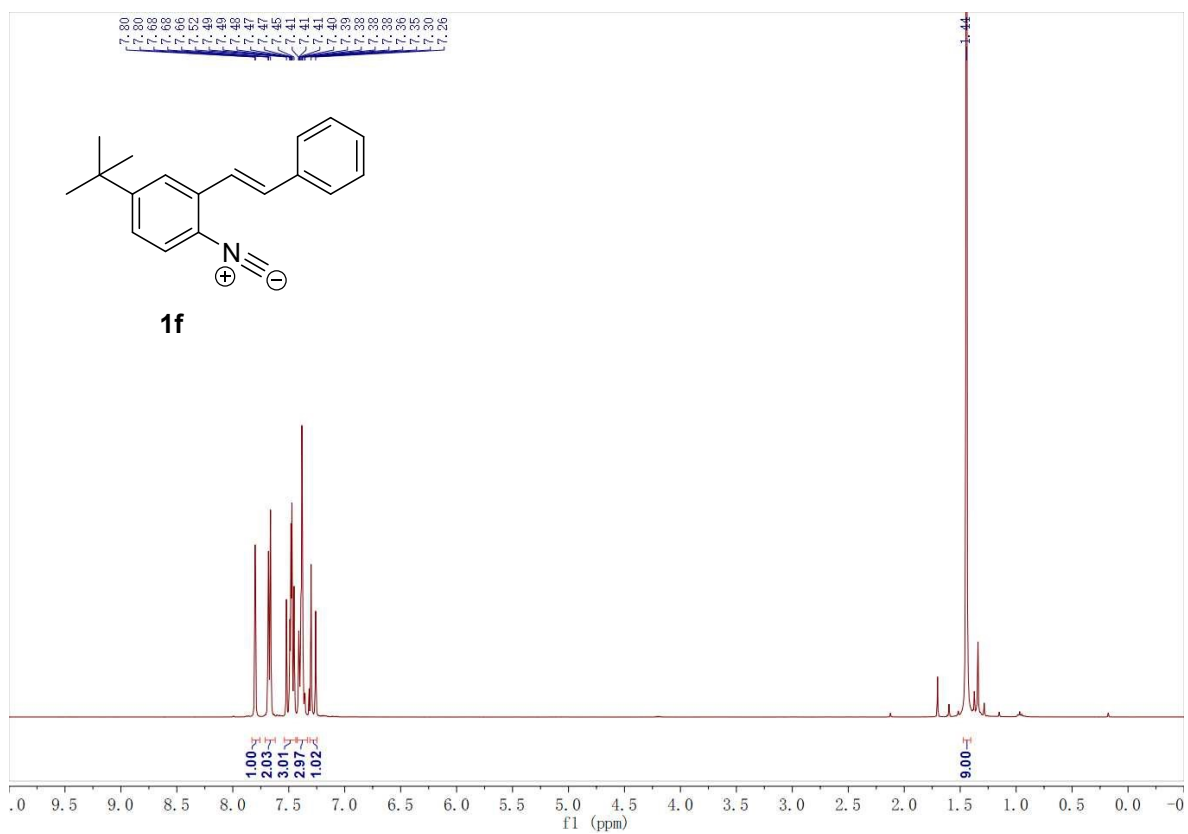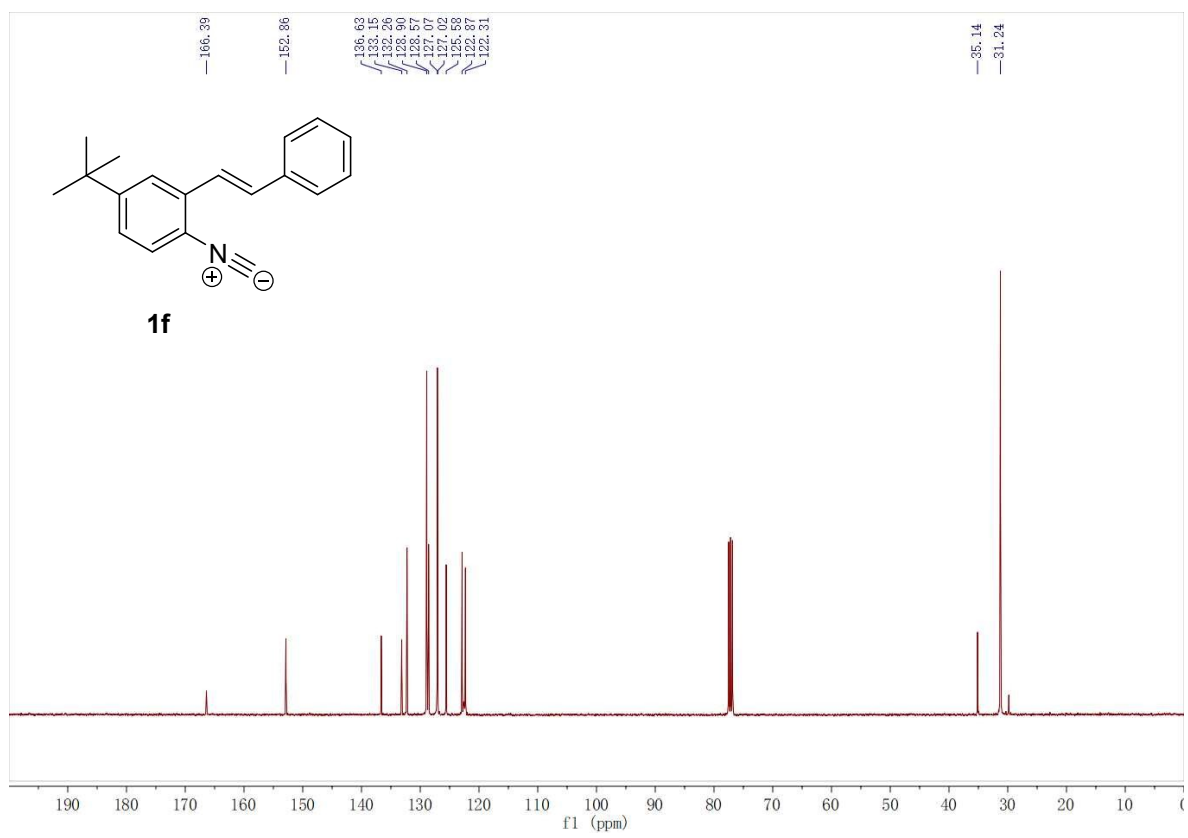



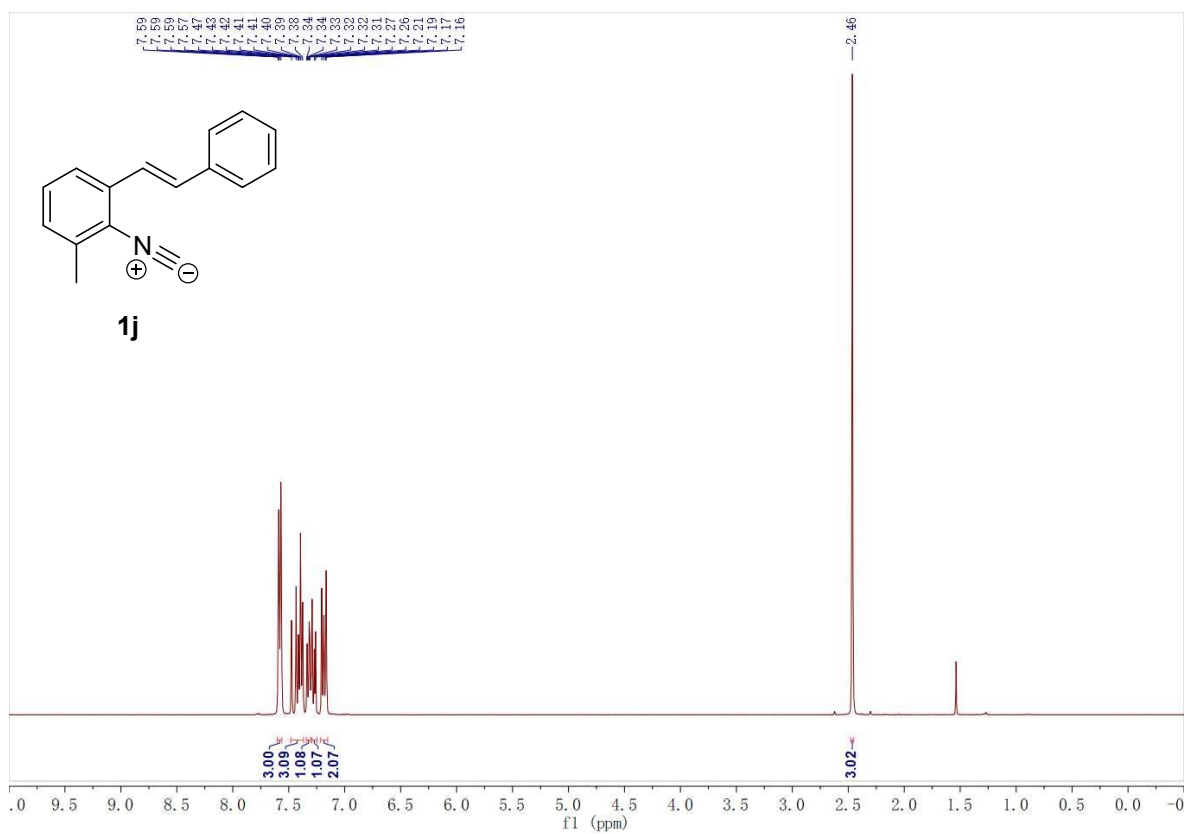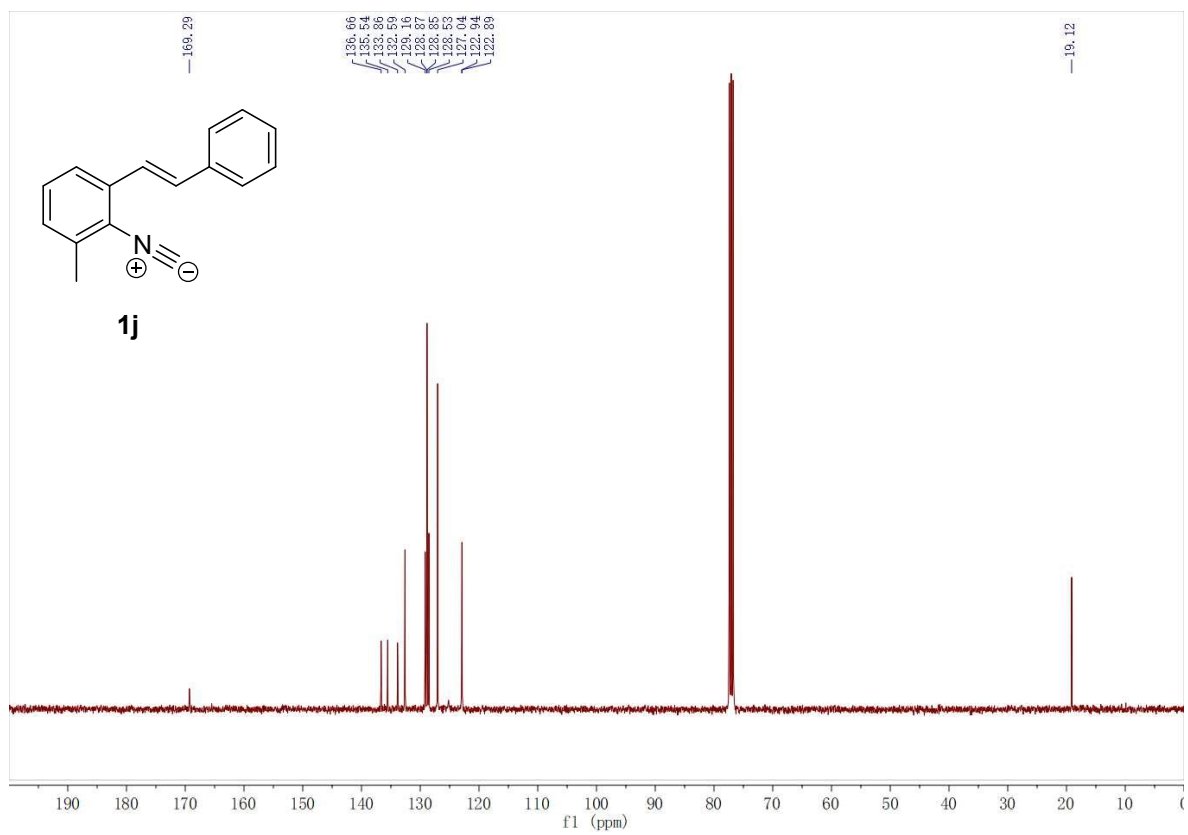

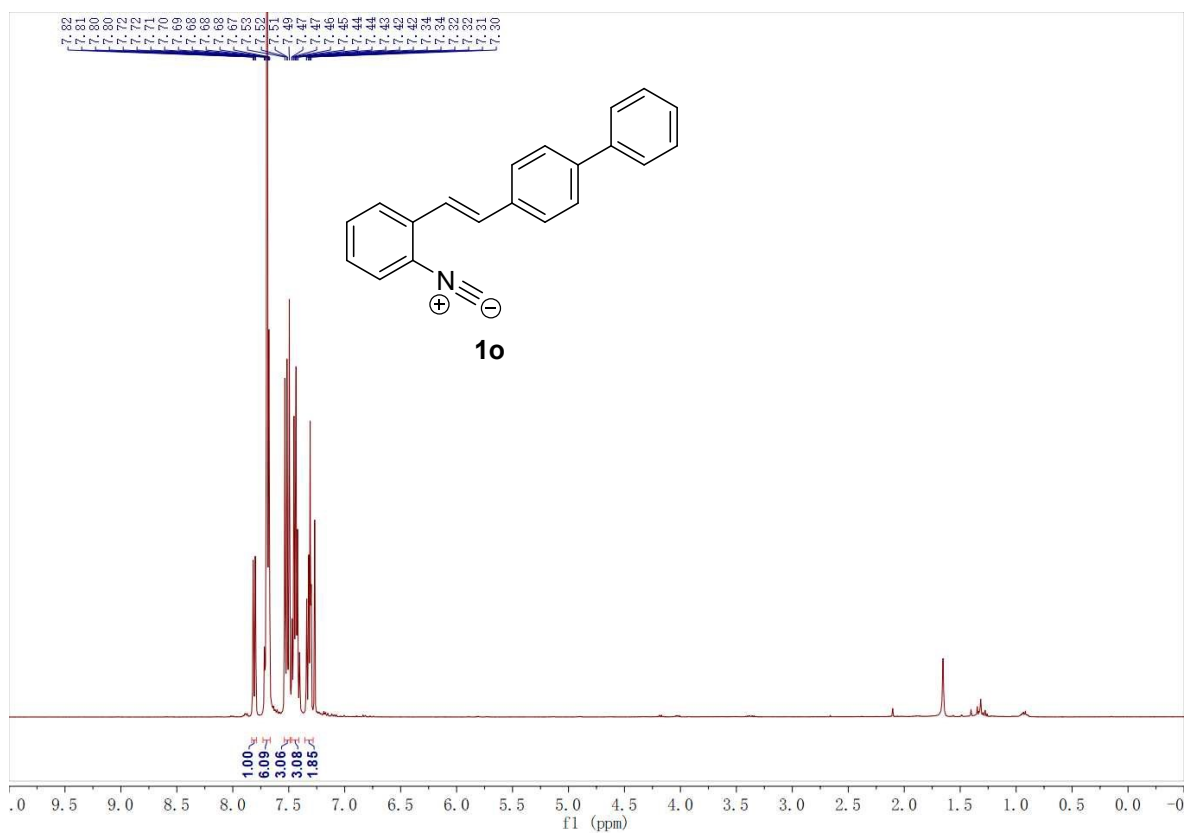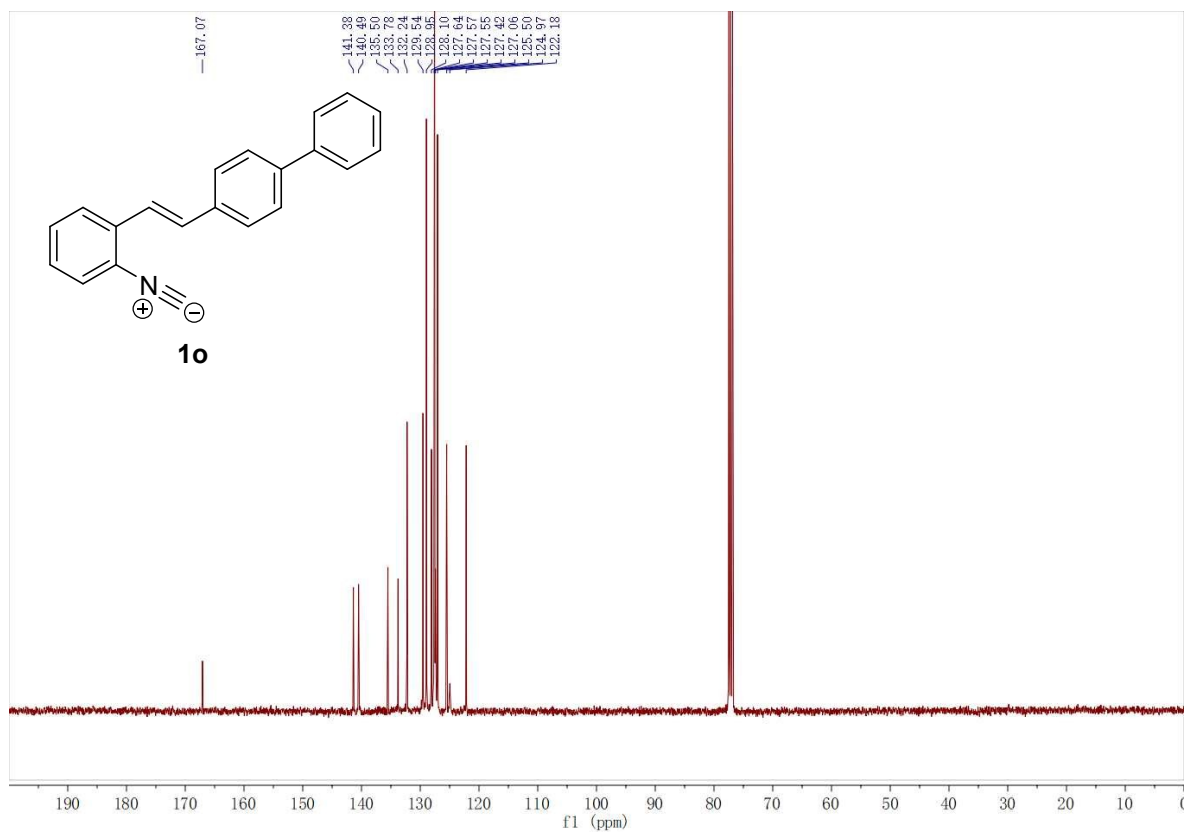

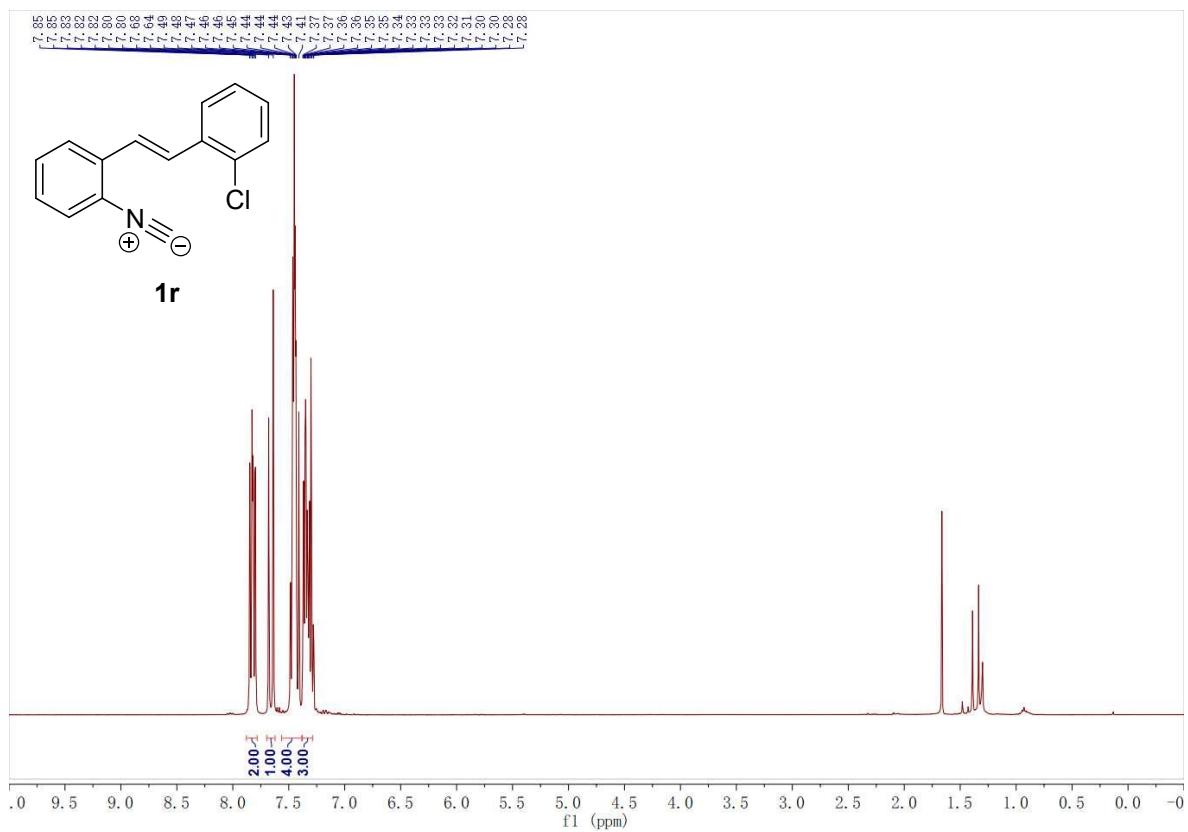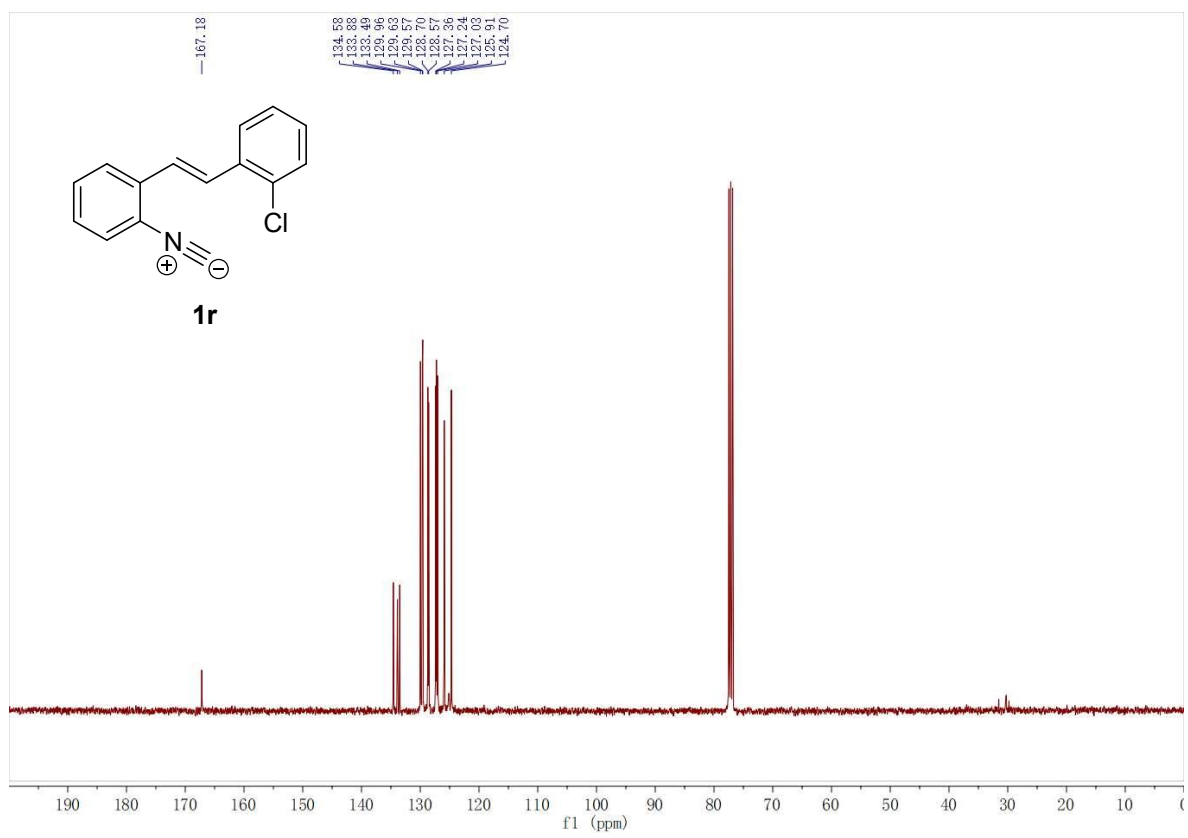

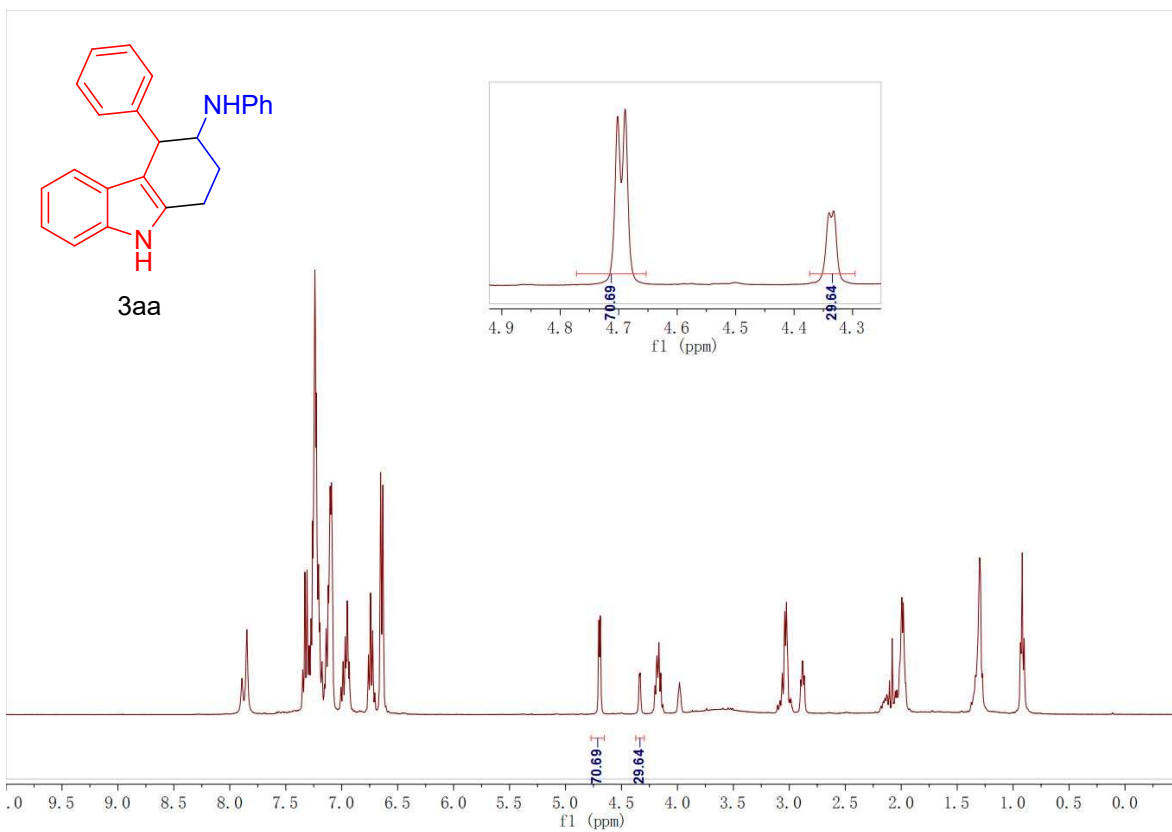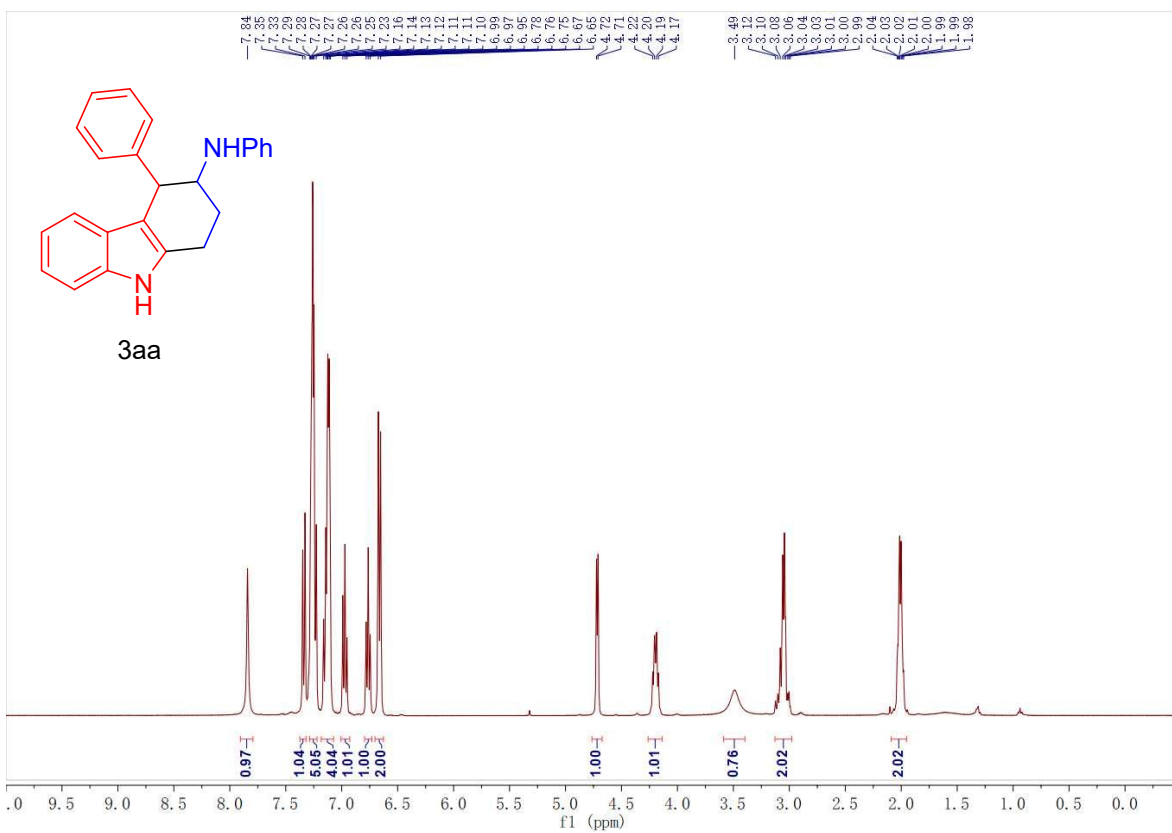

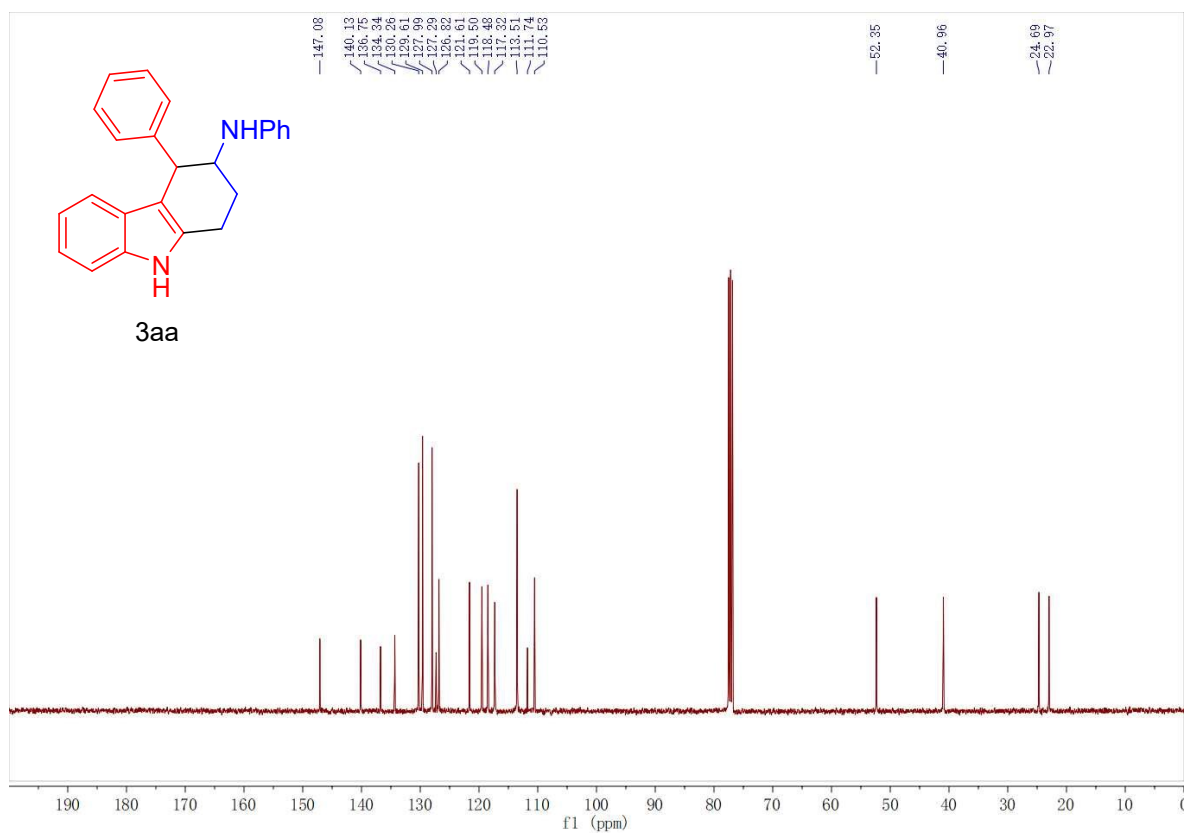

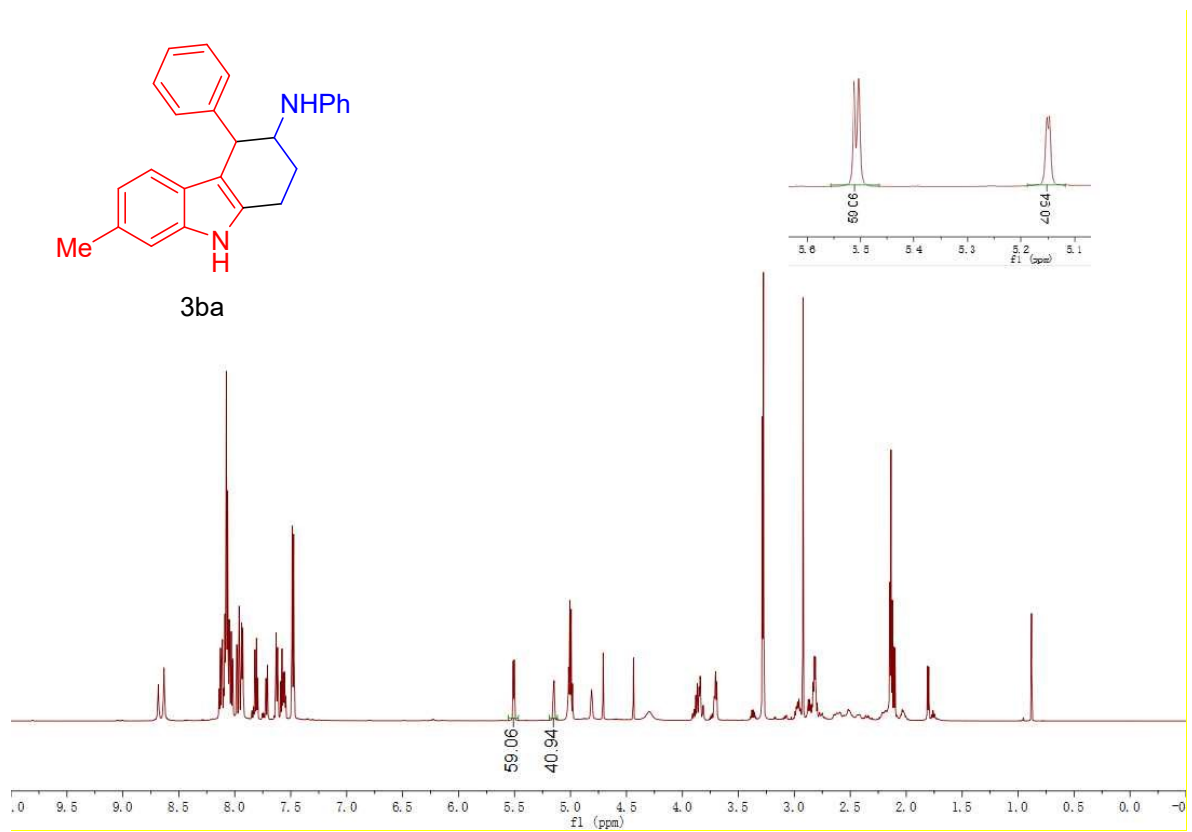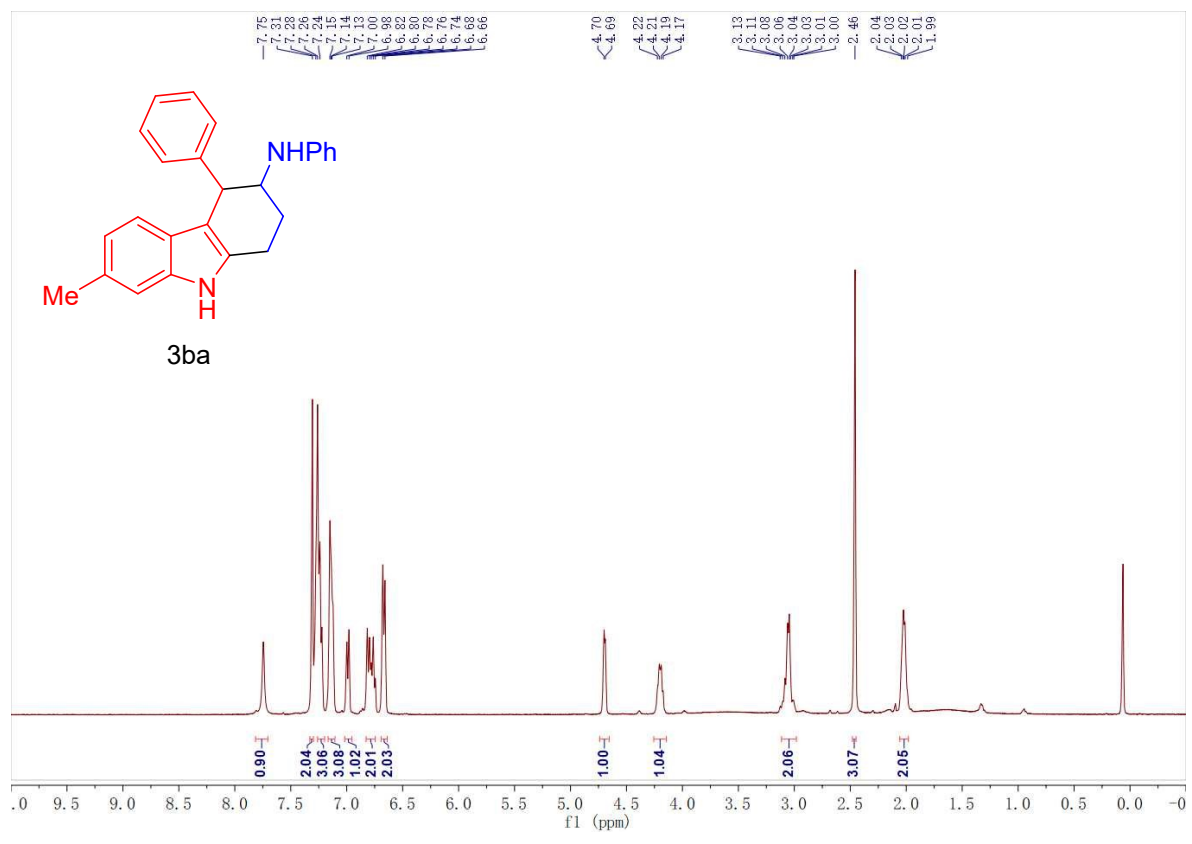

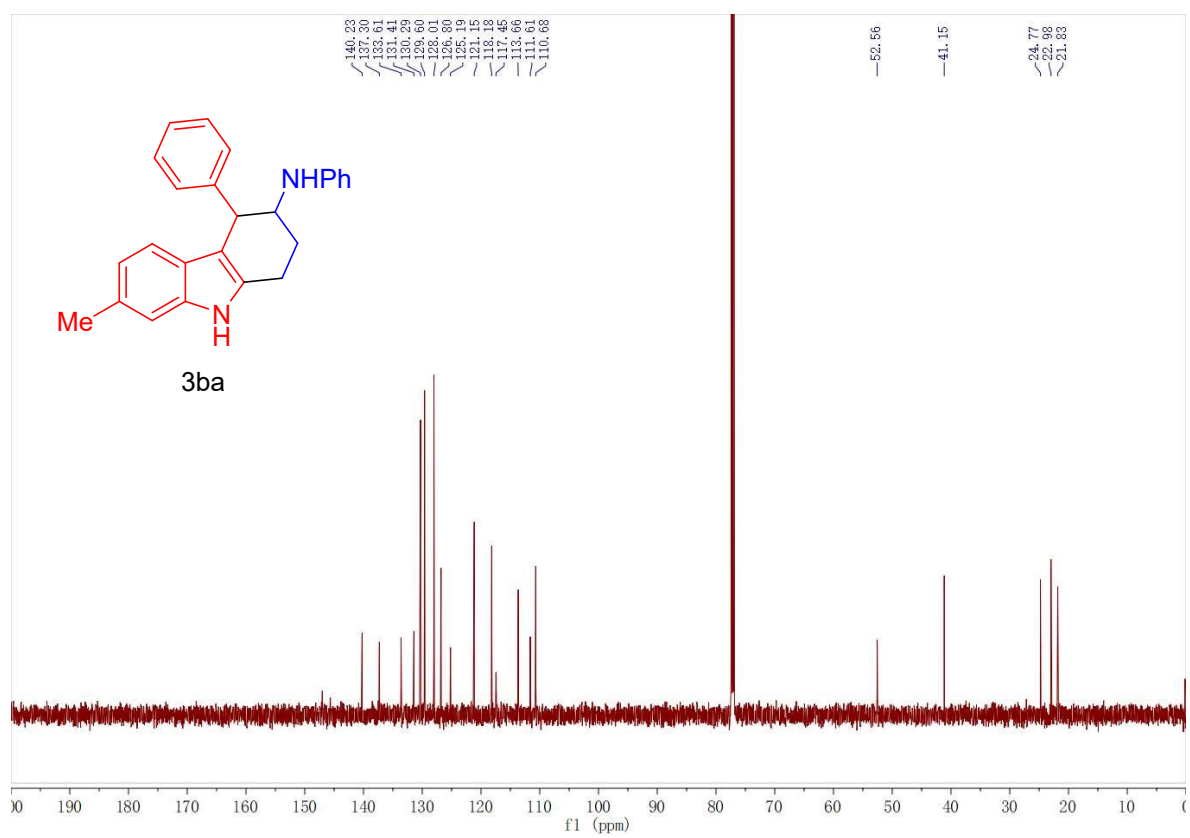

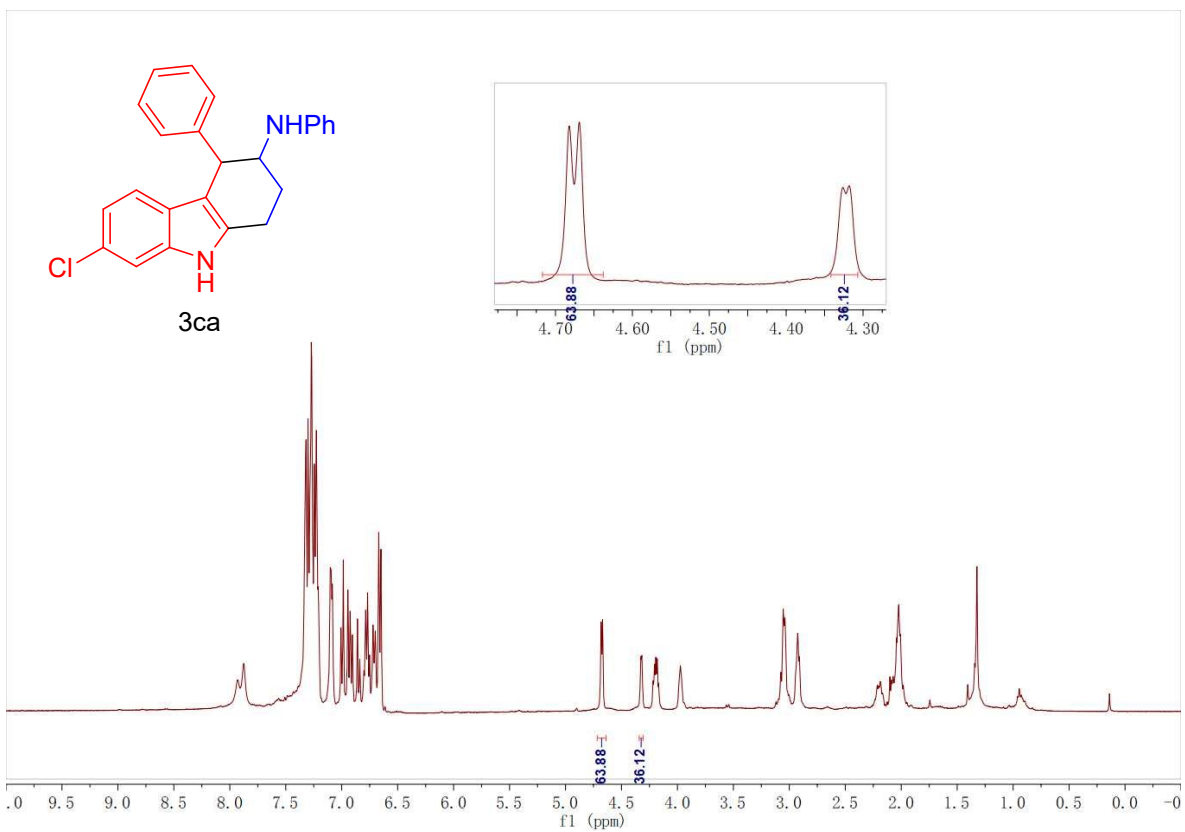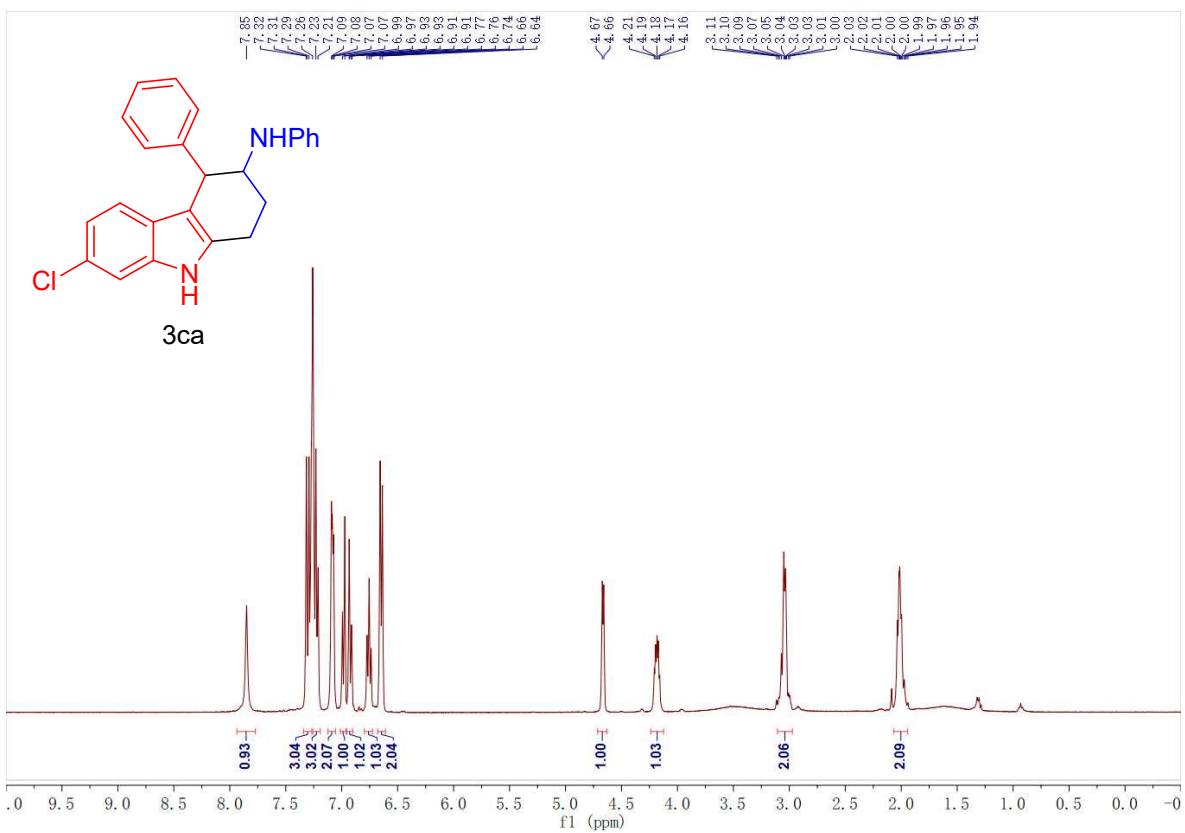



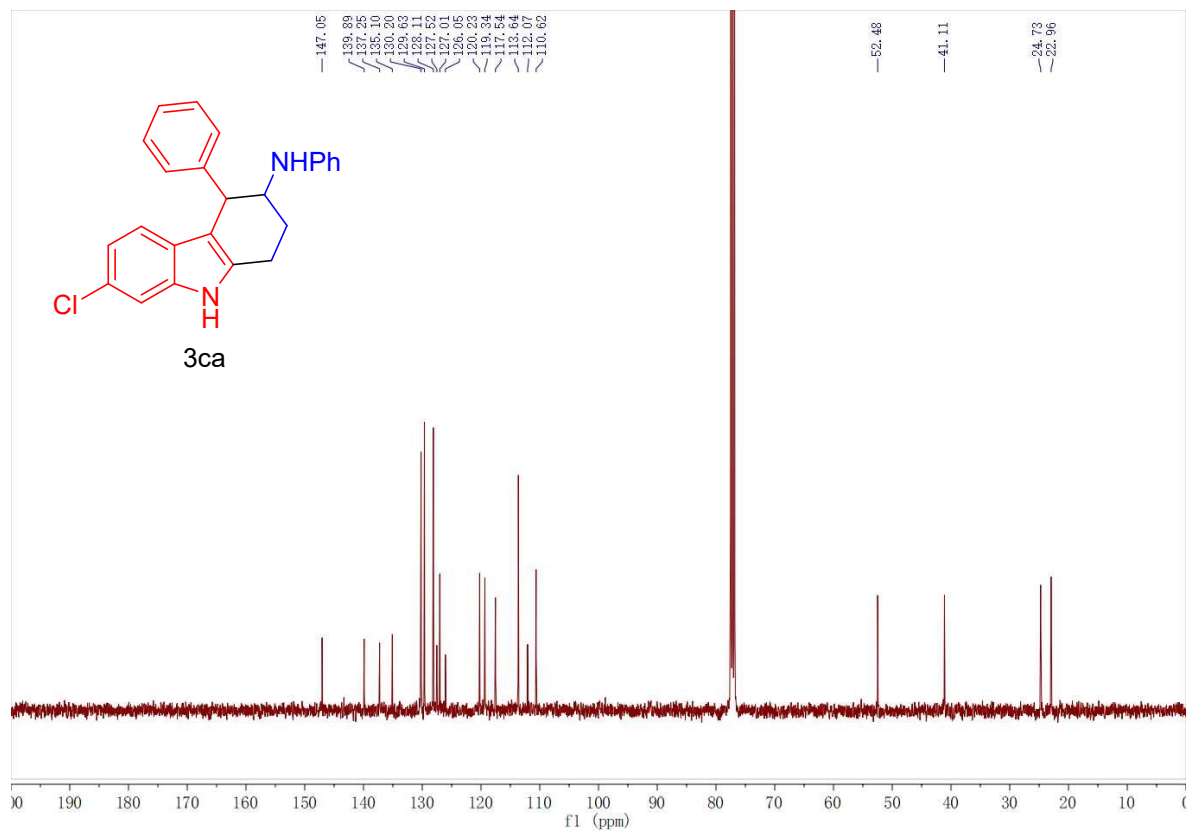

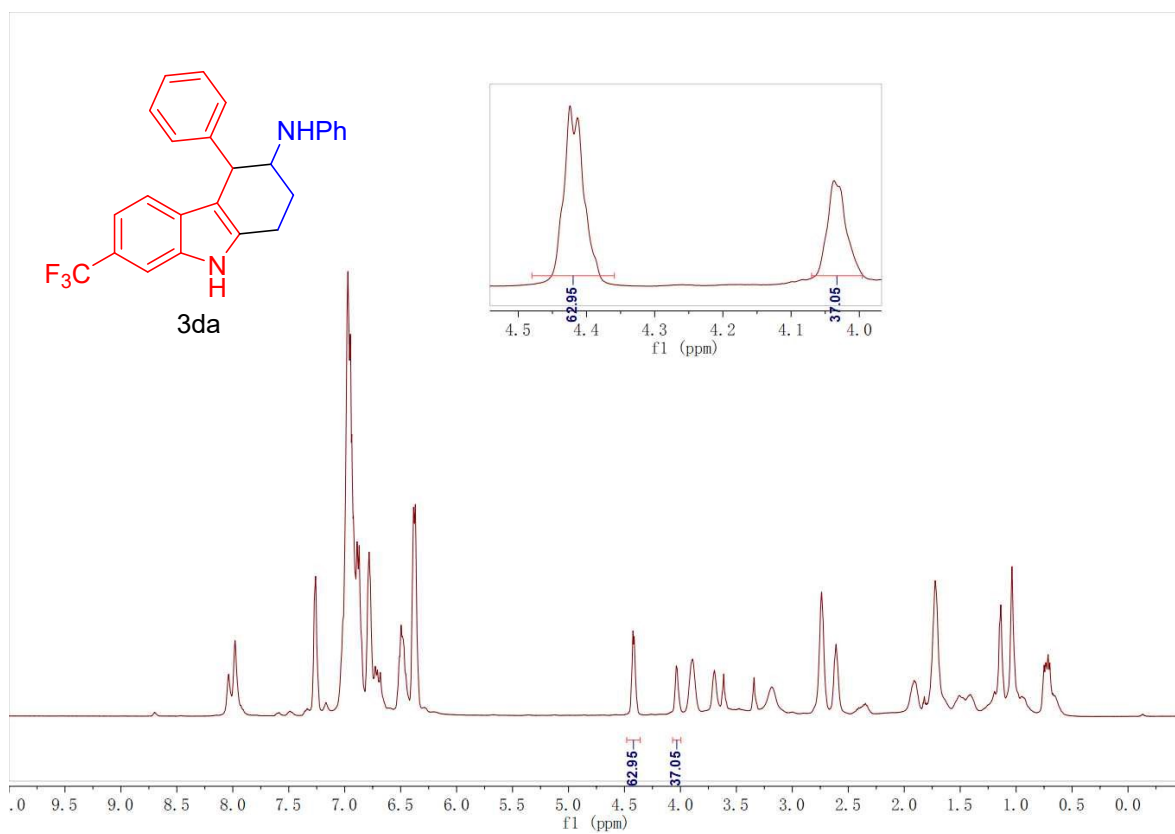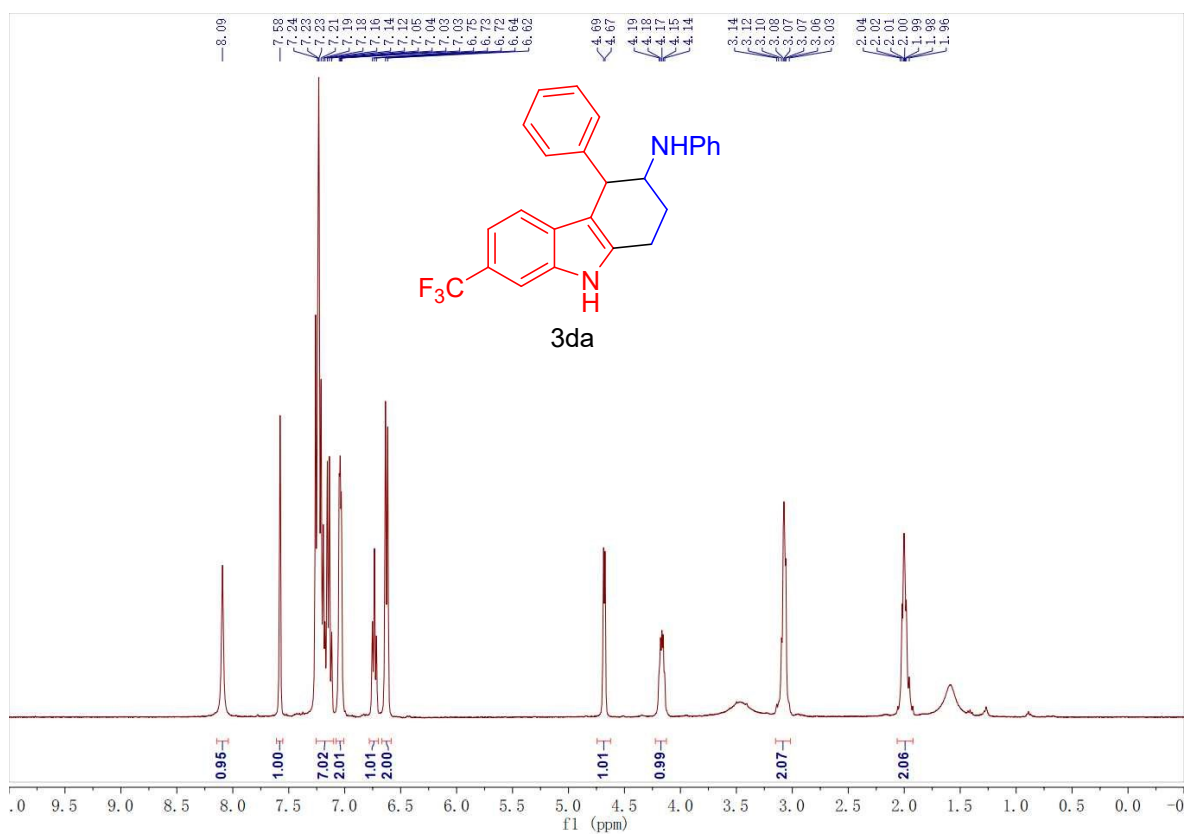

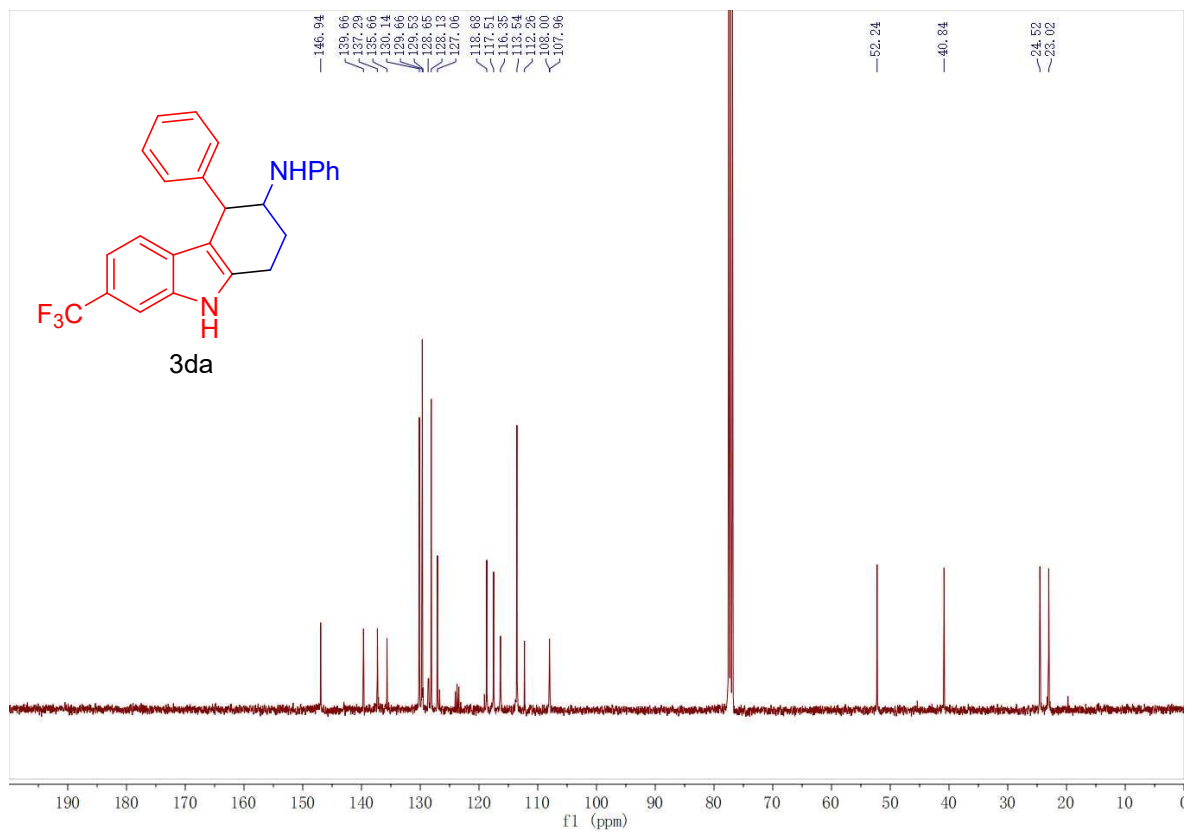

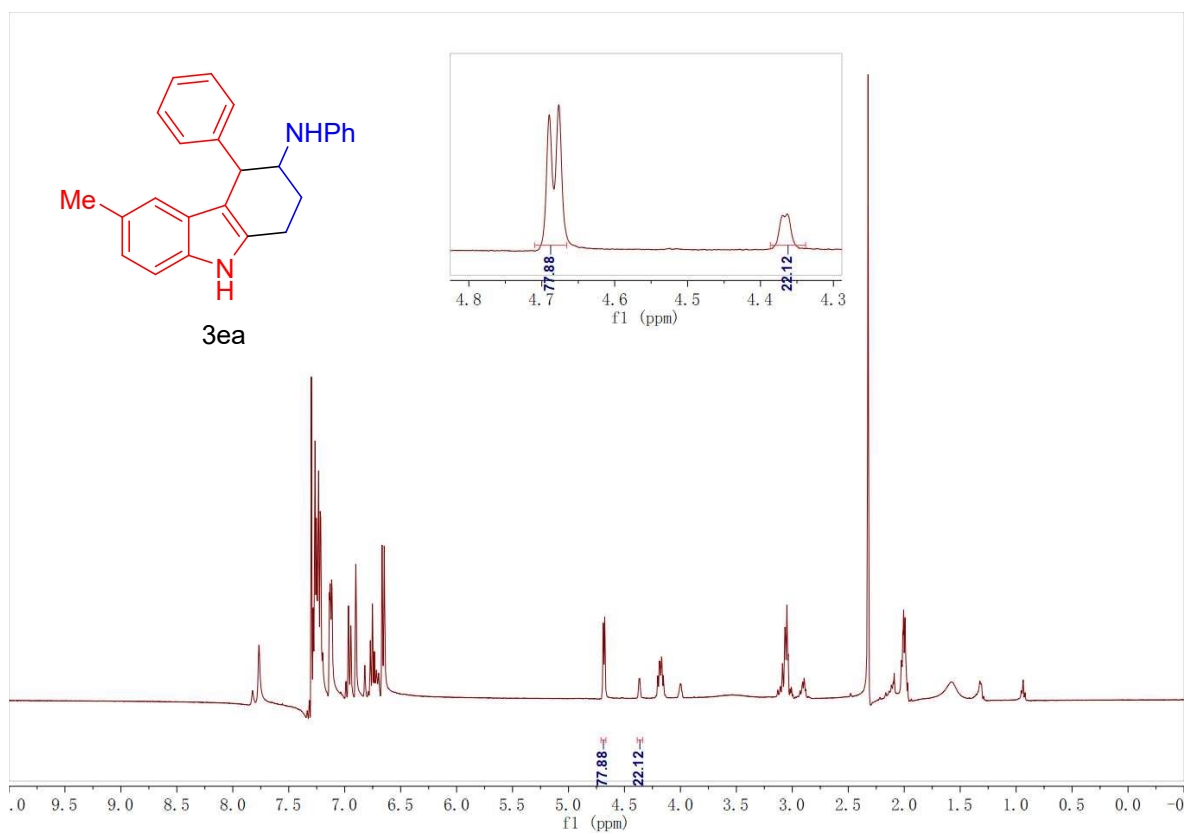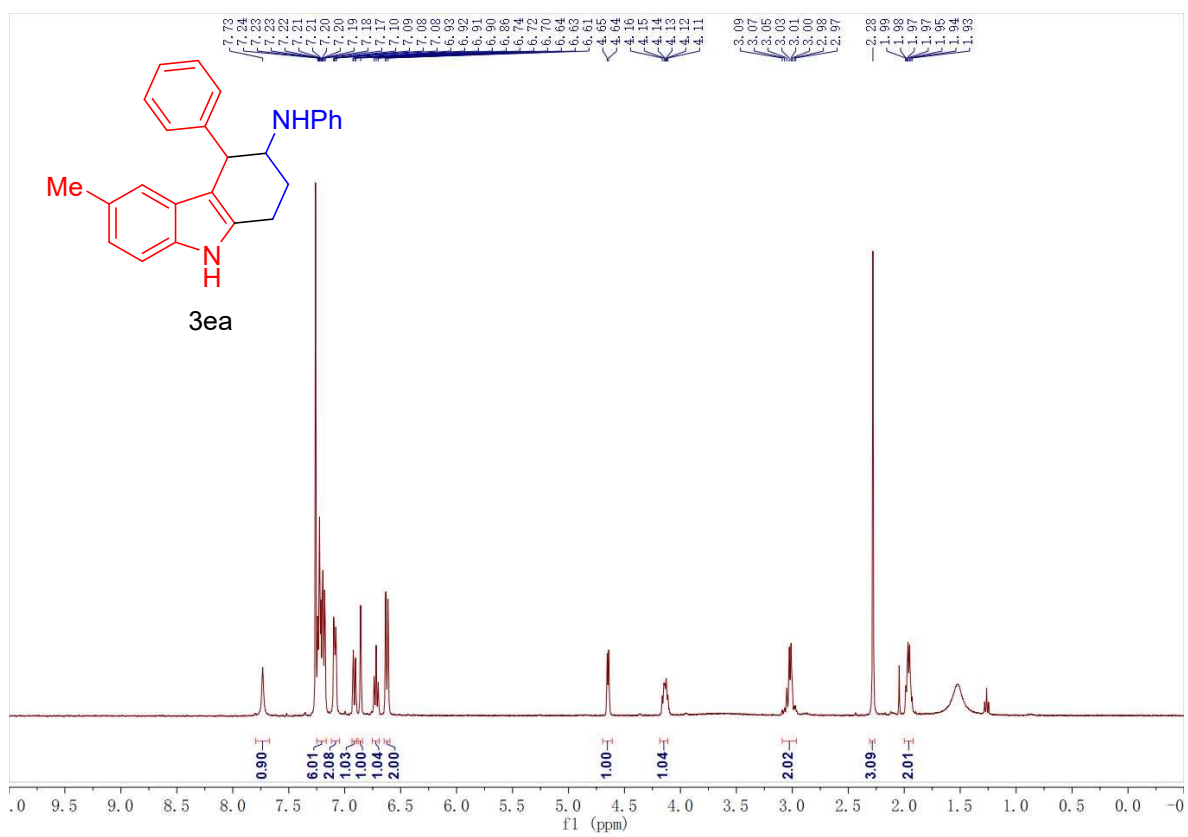

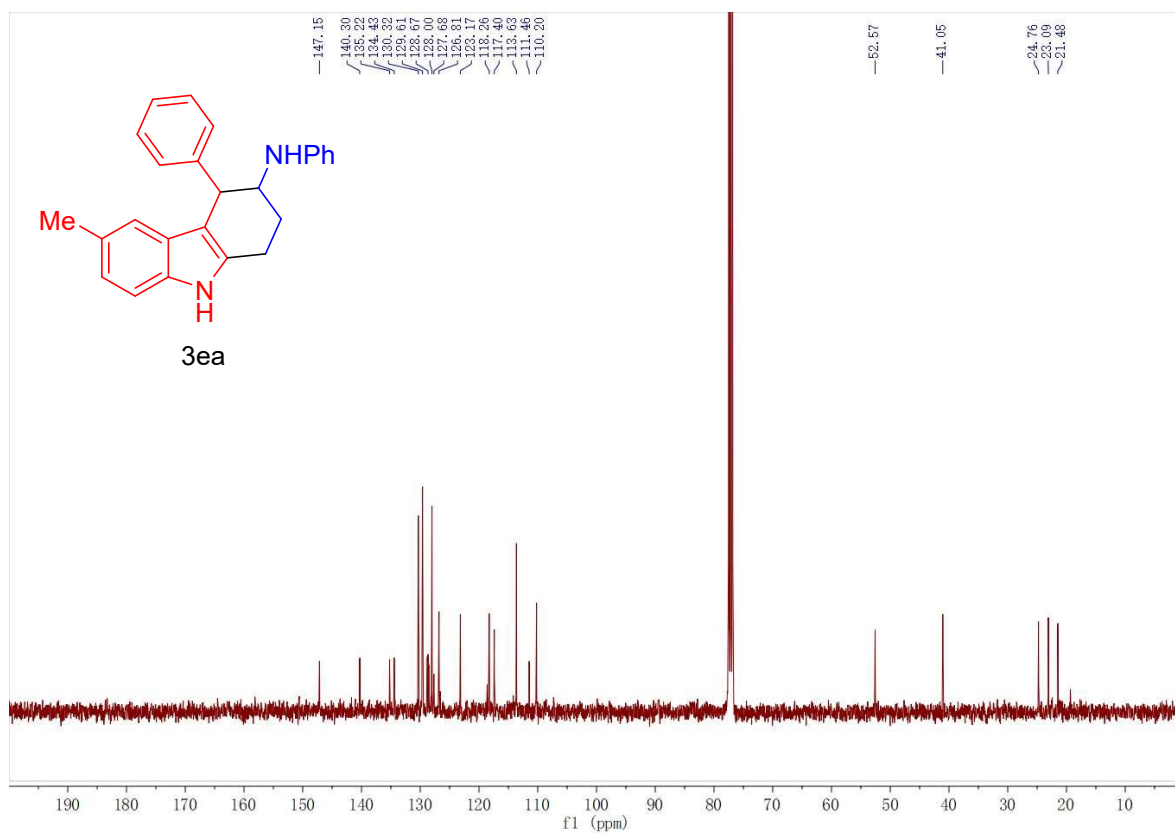

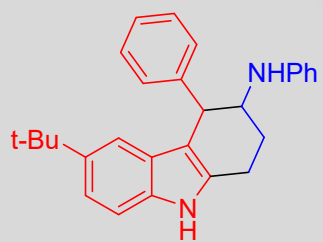

3fa

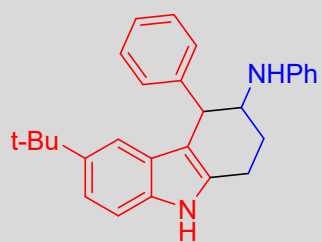

3fa

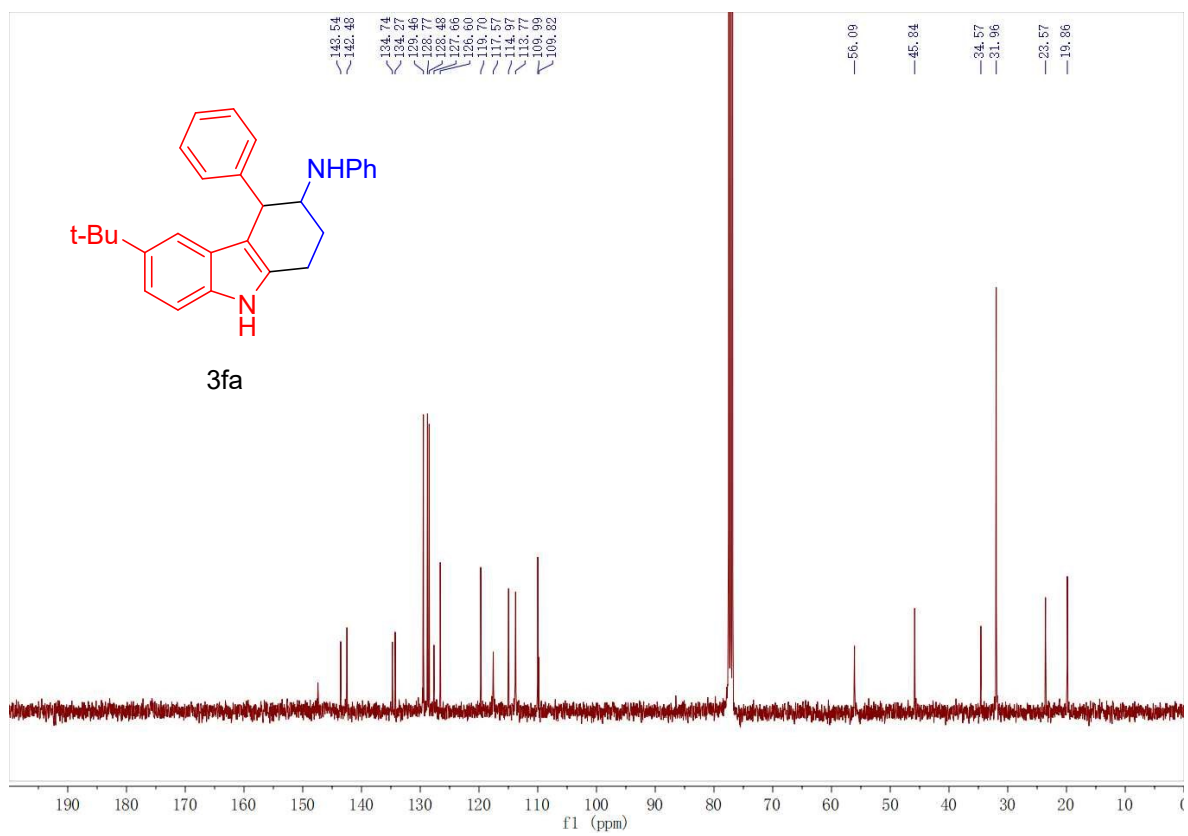

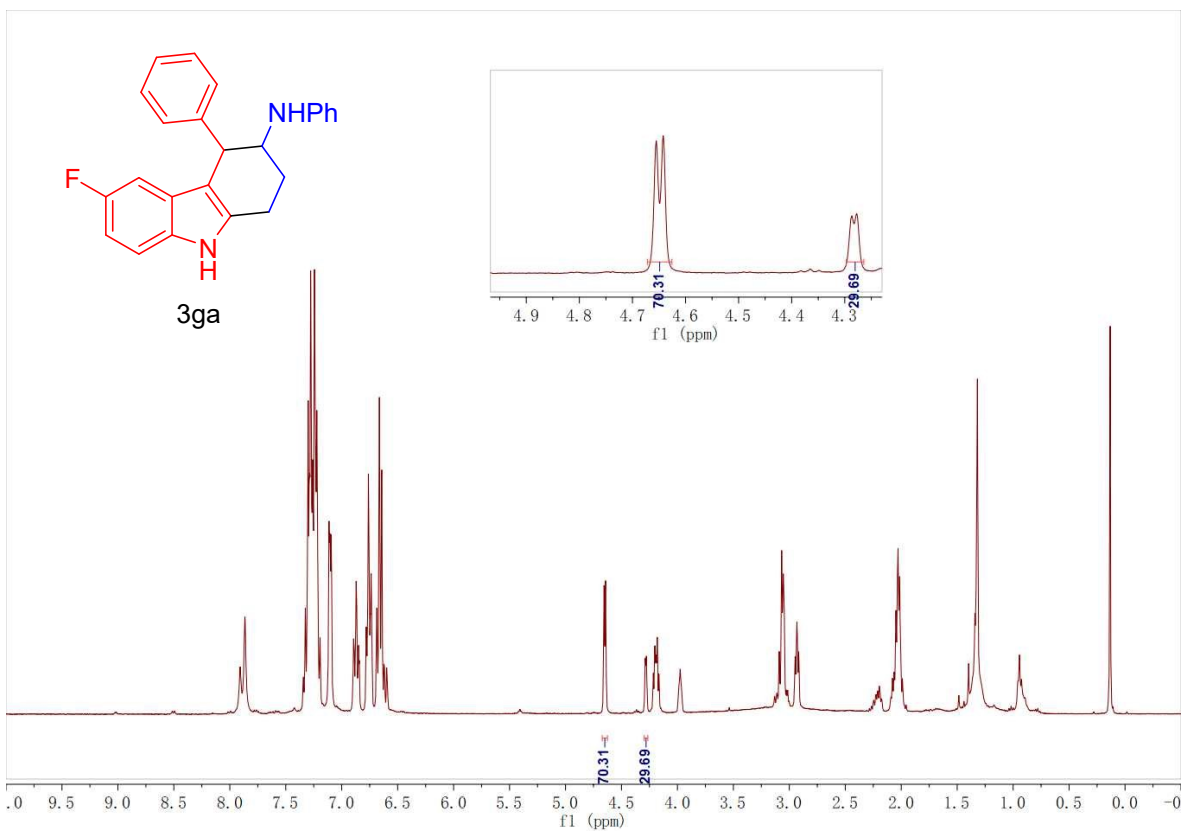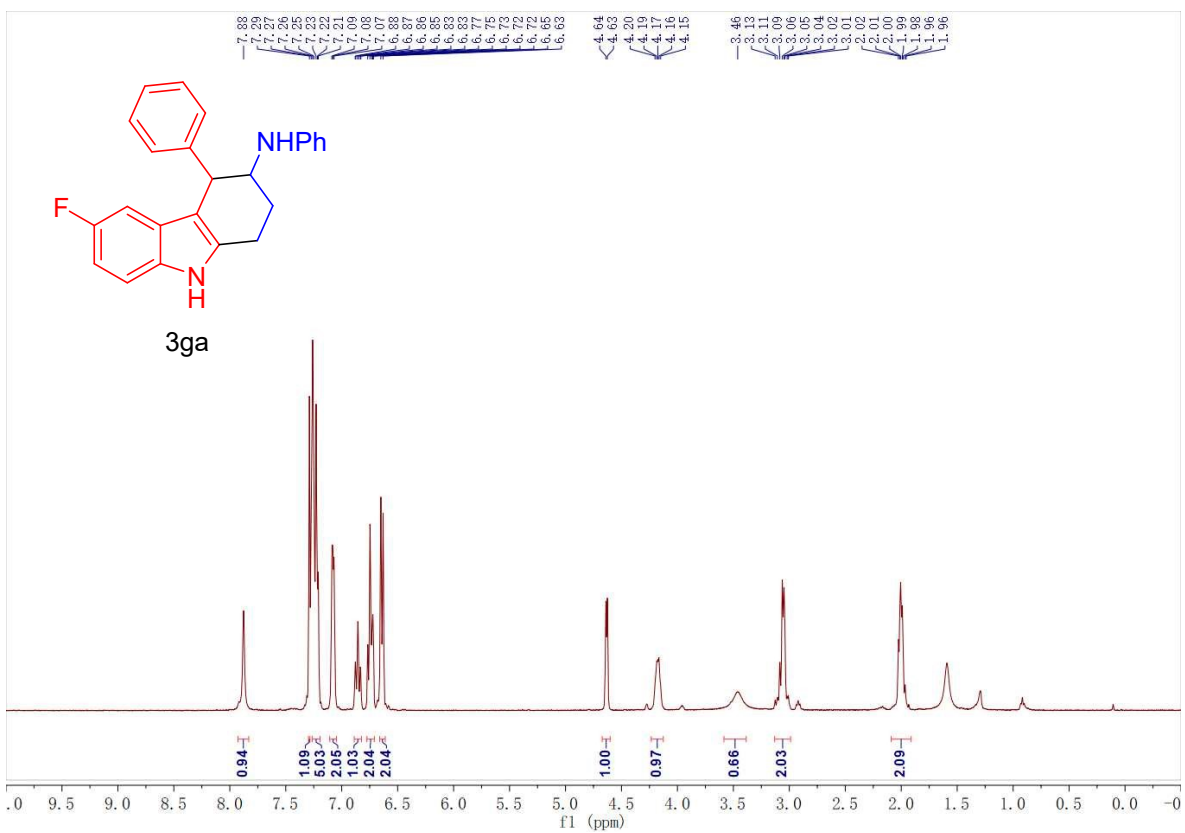



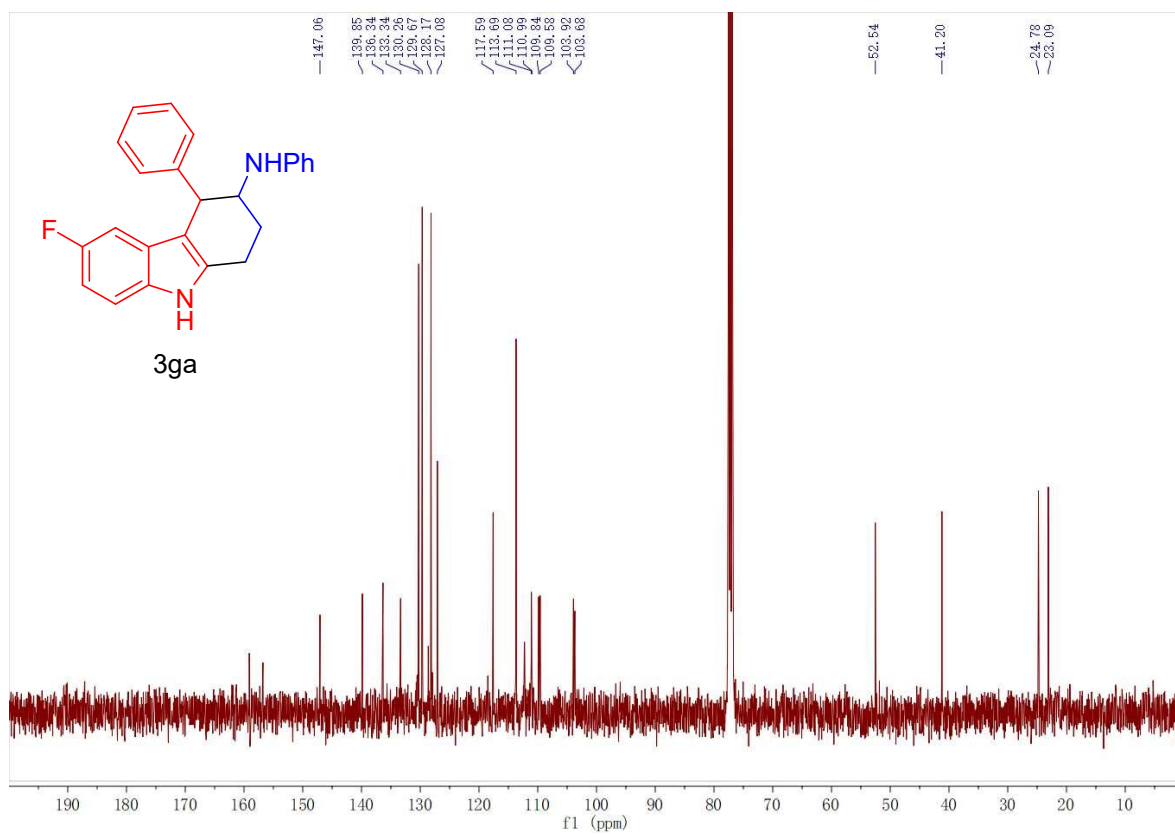

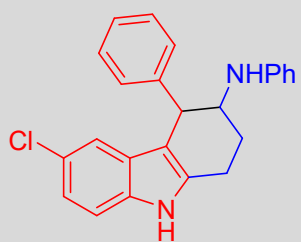

3ha

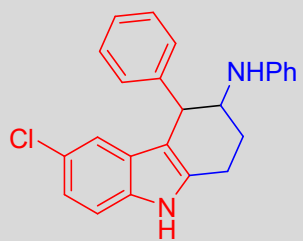

3ha

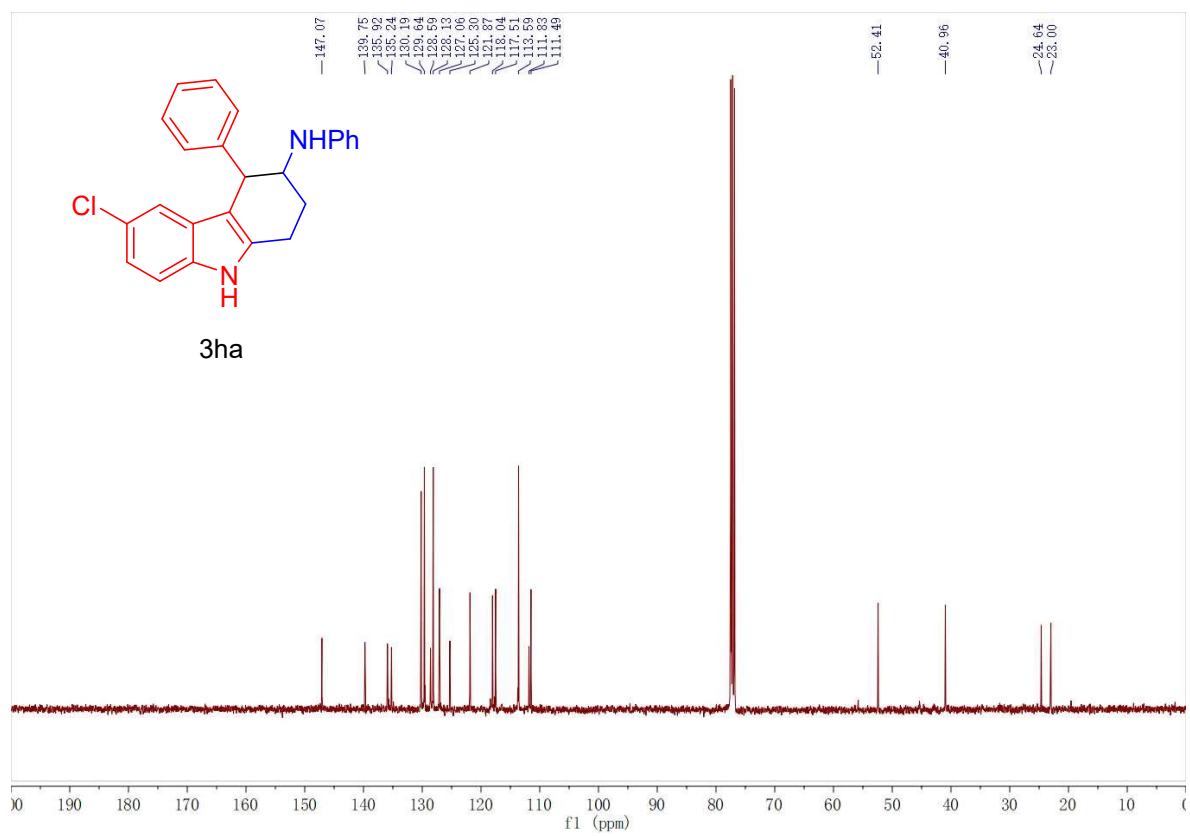

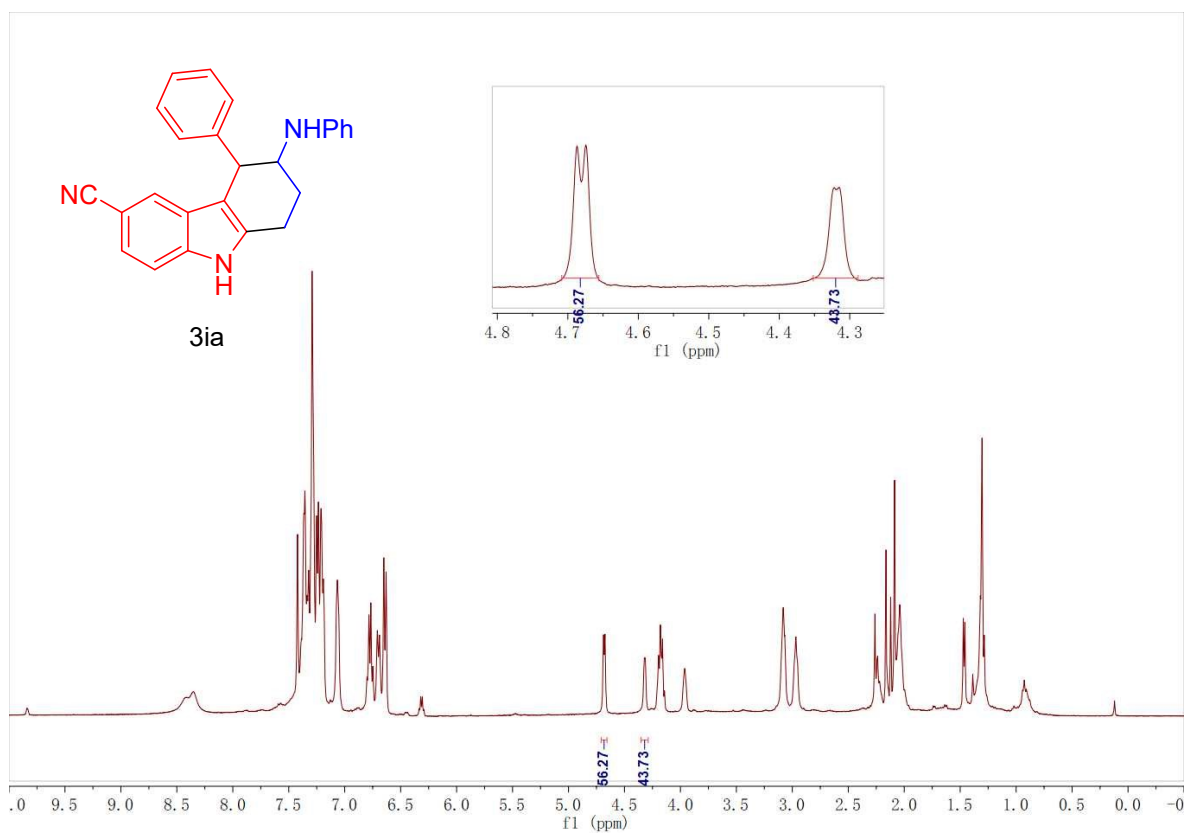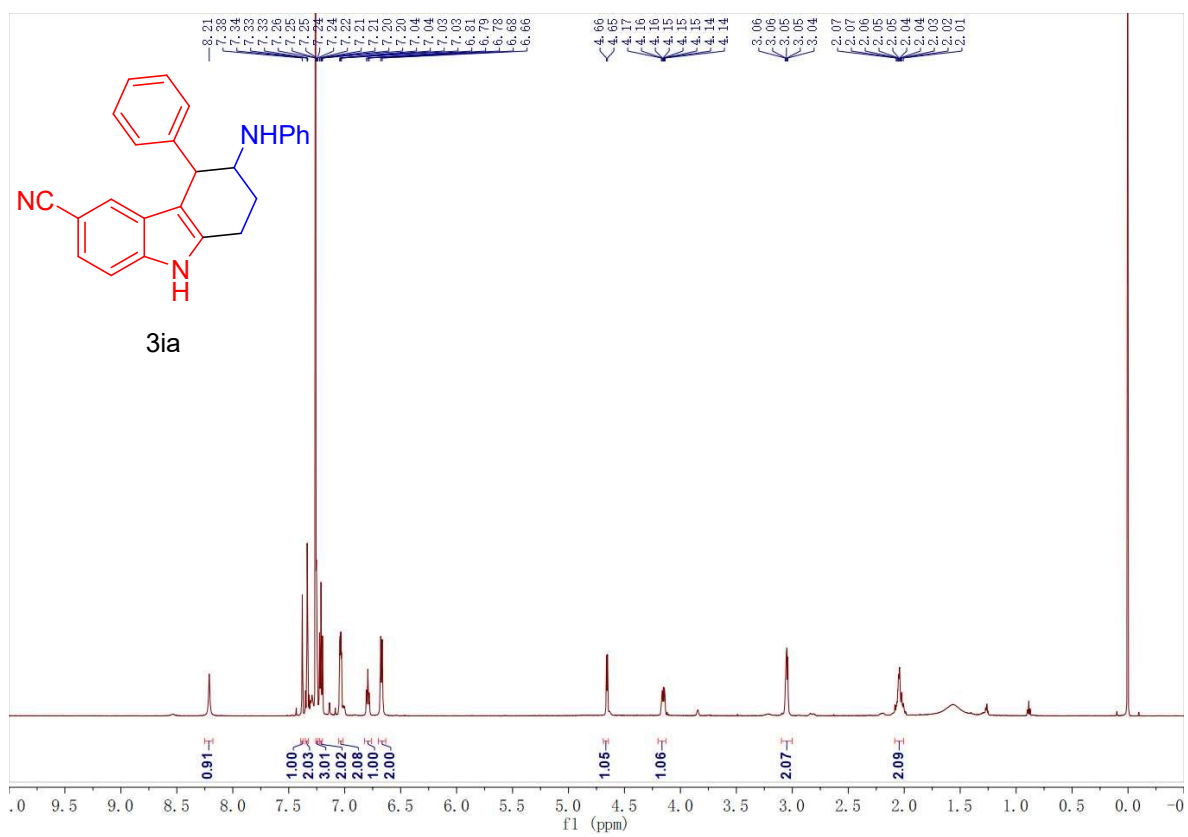

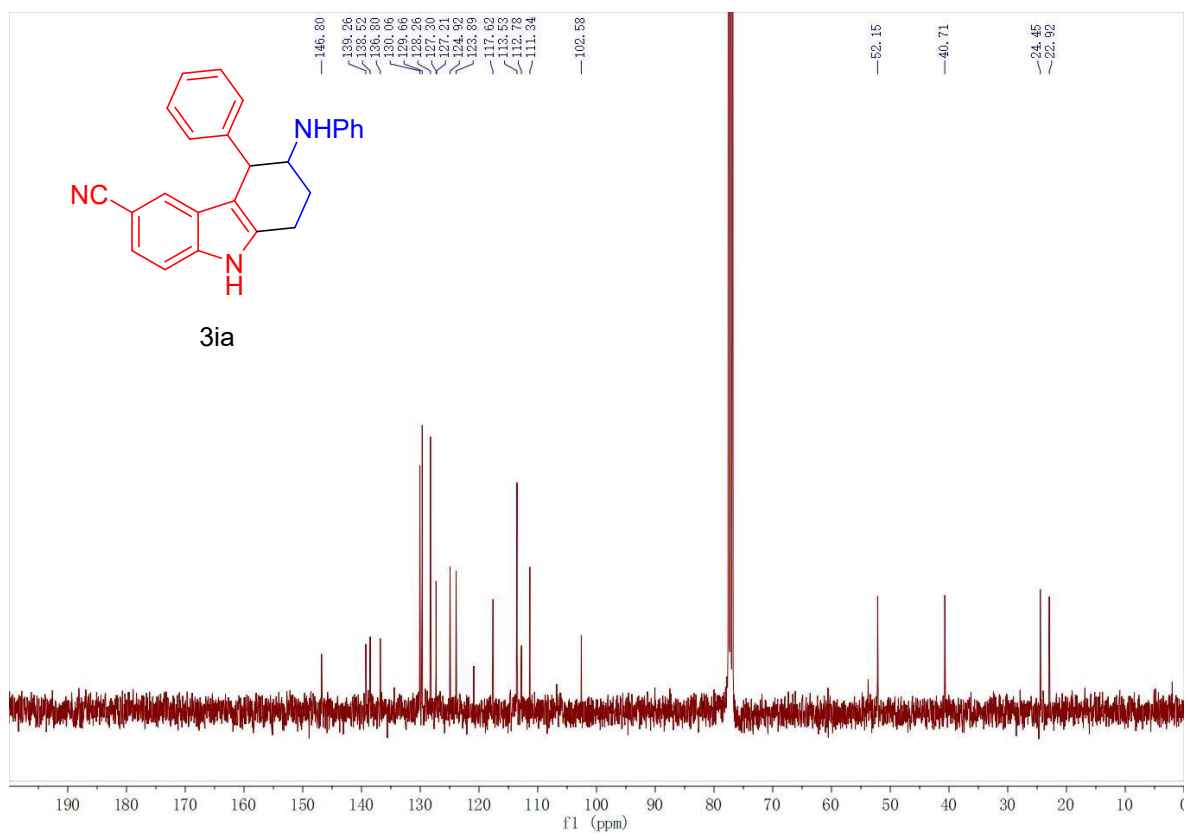

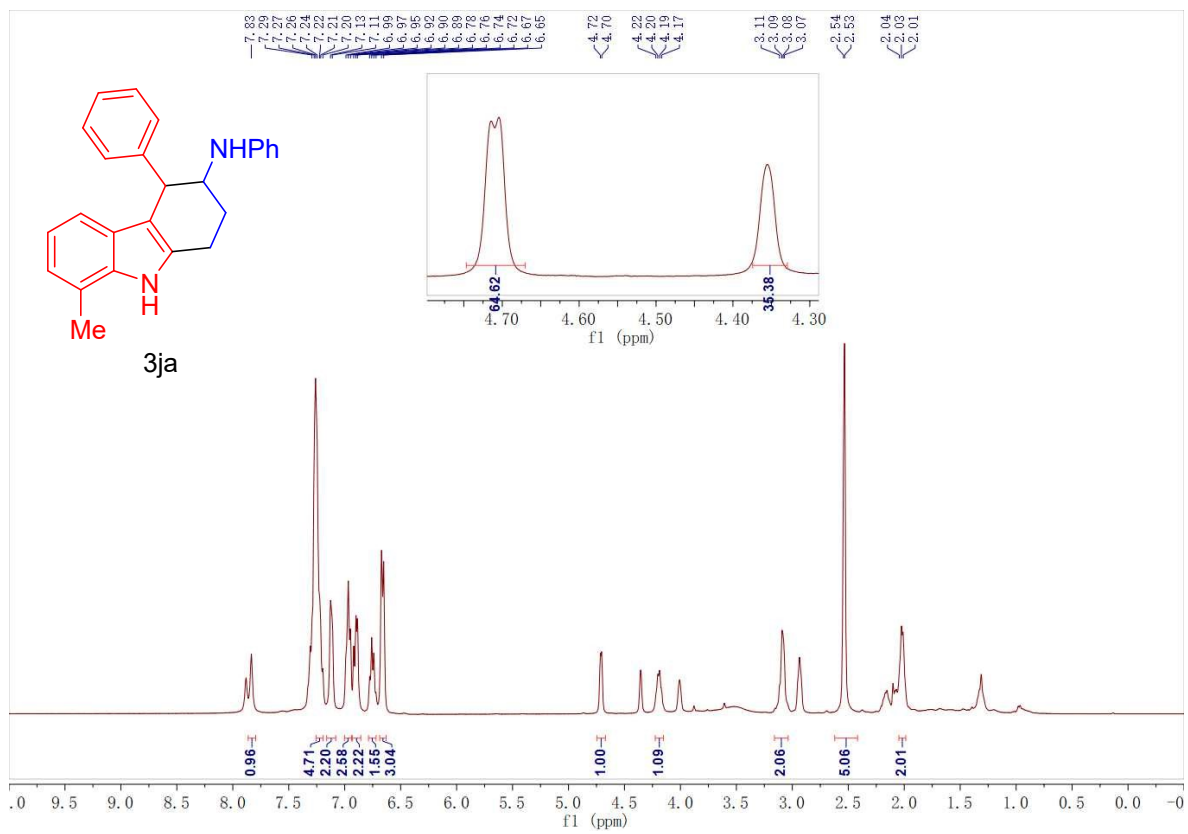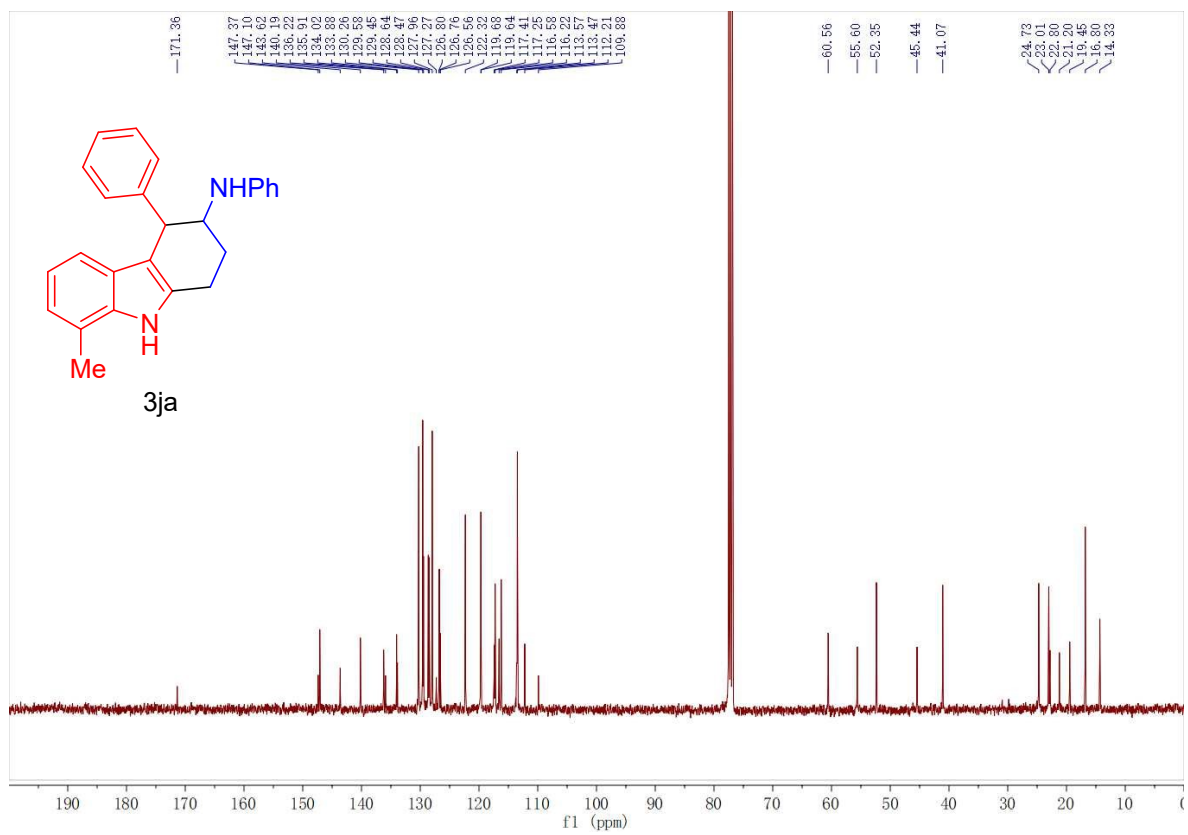

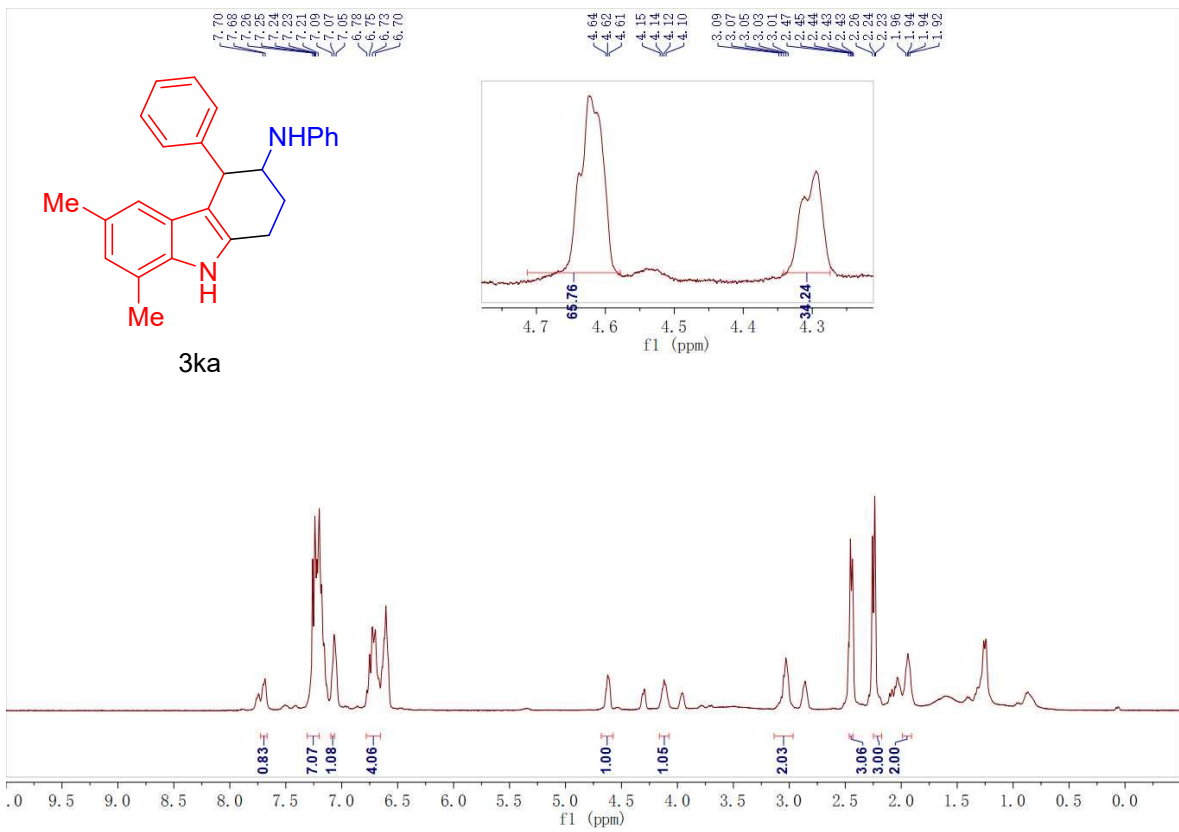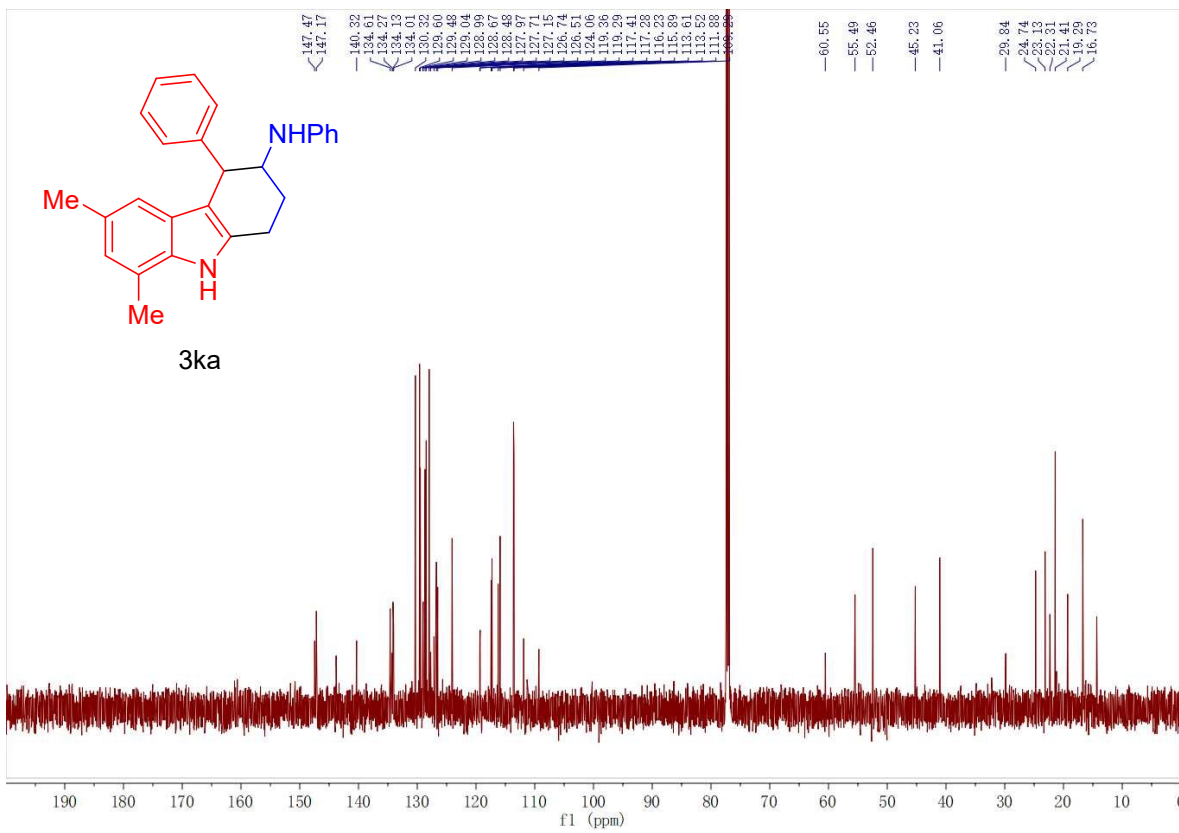

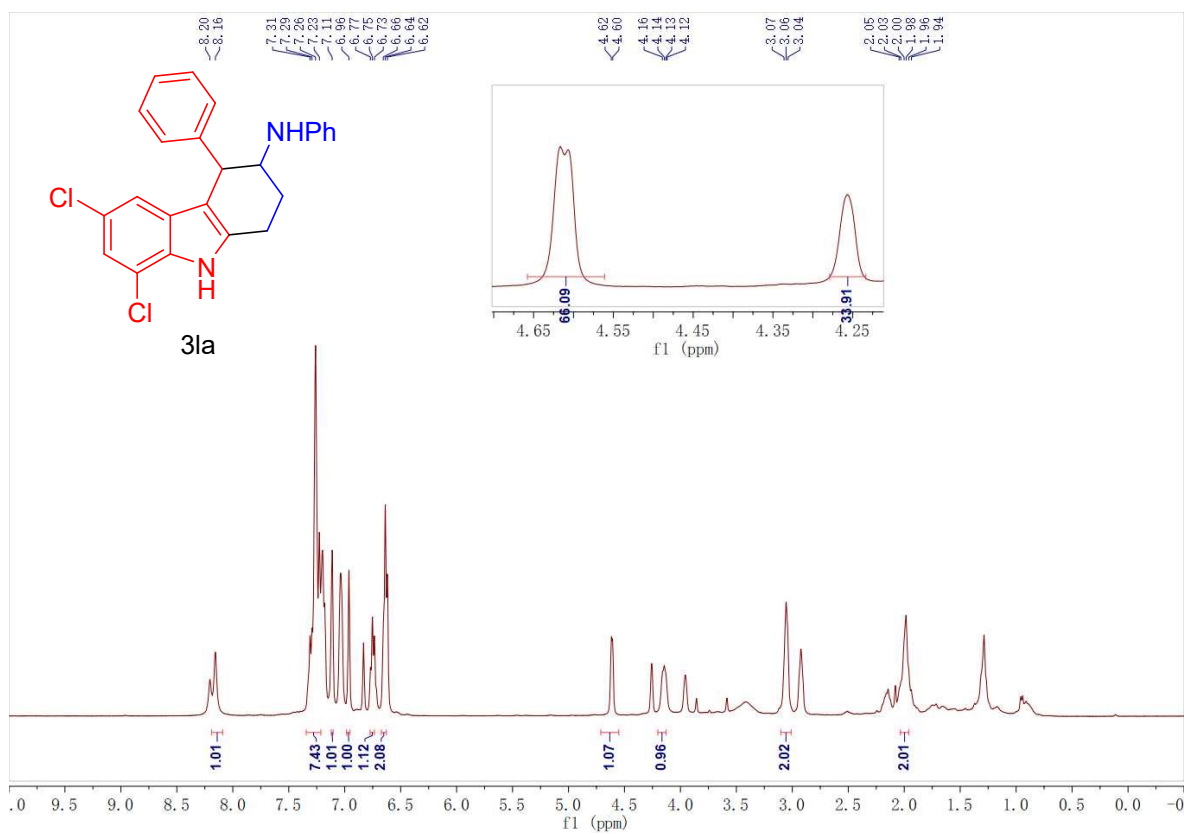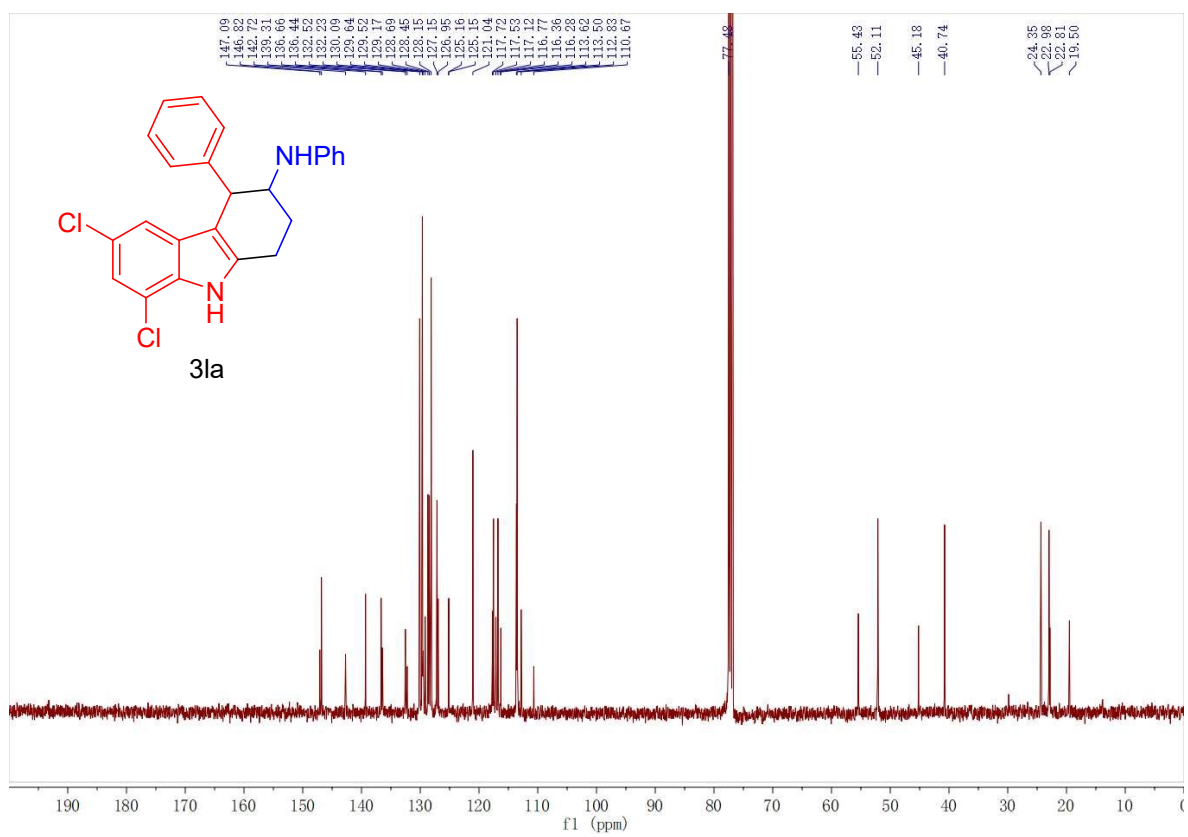



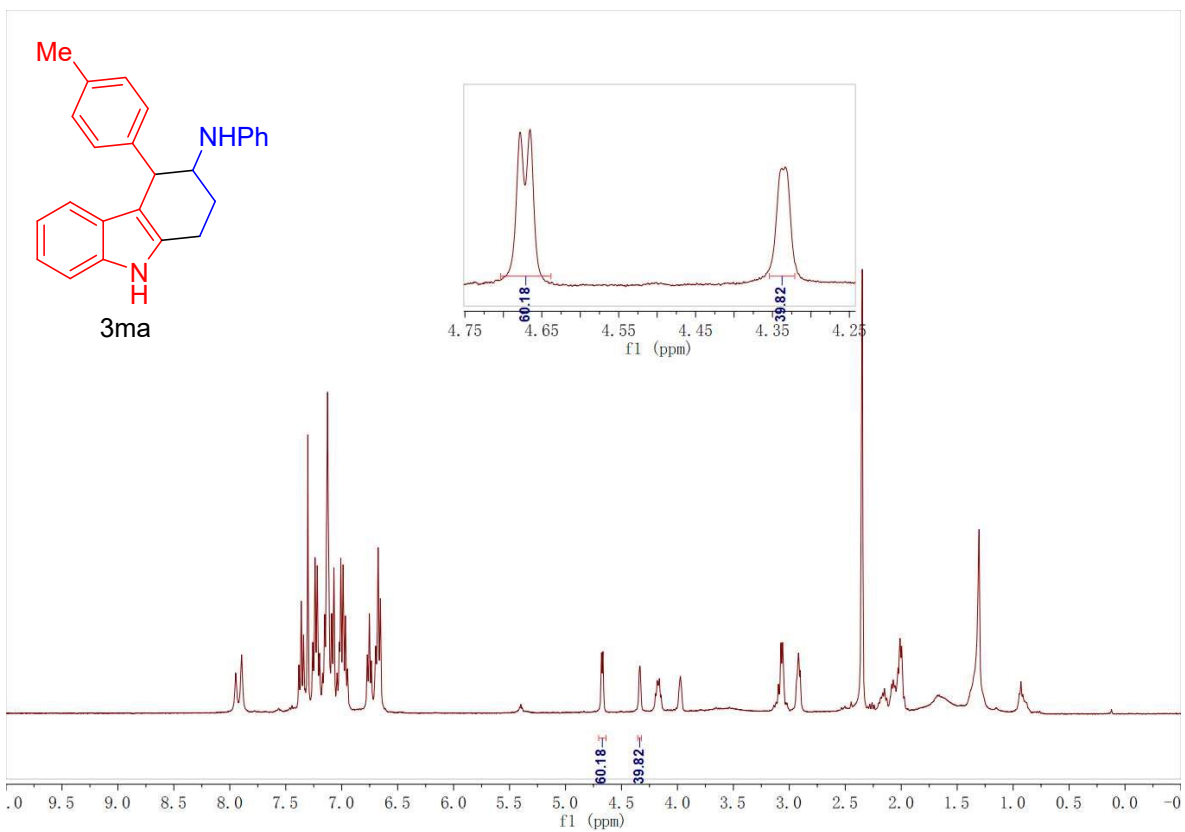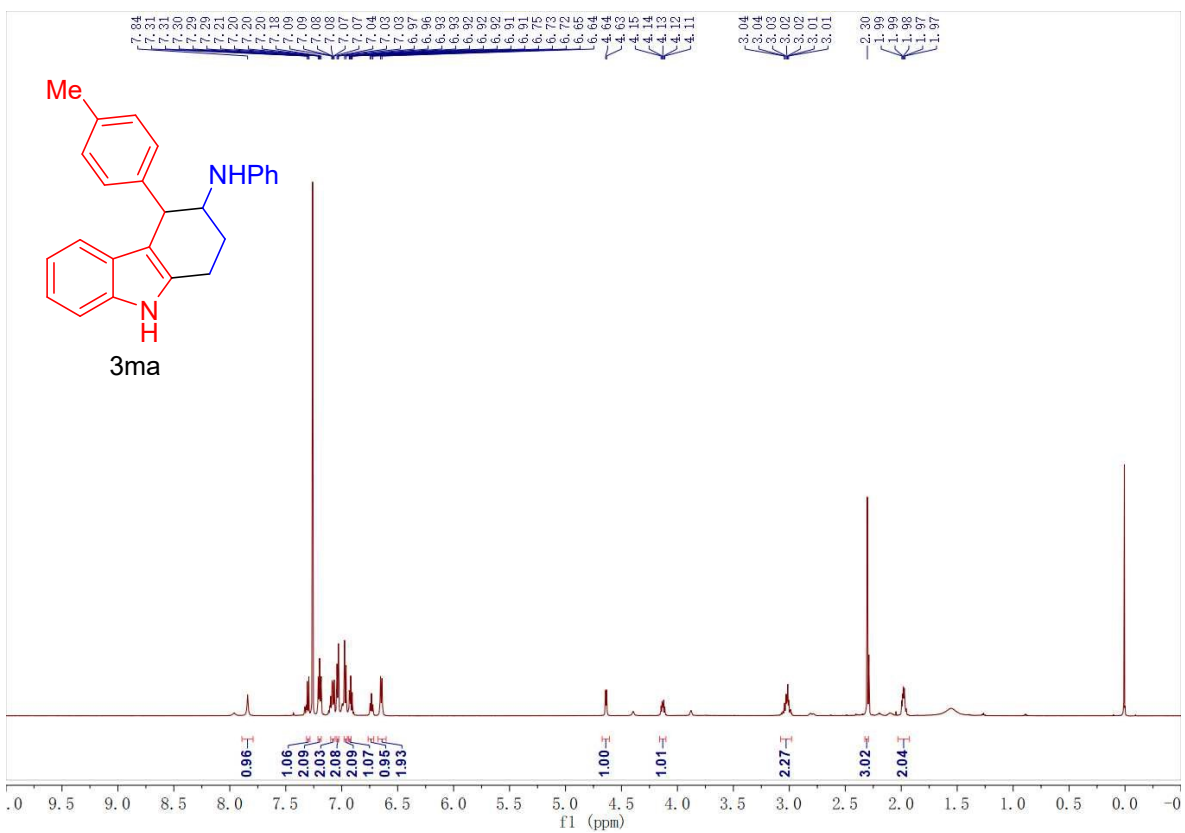

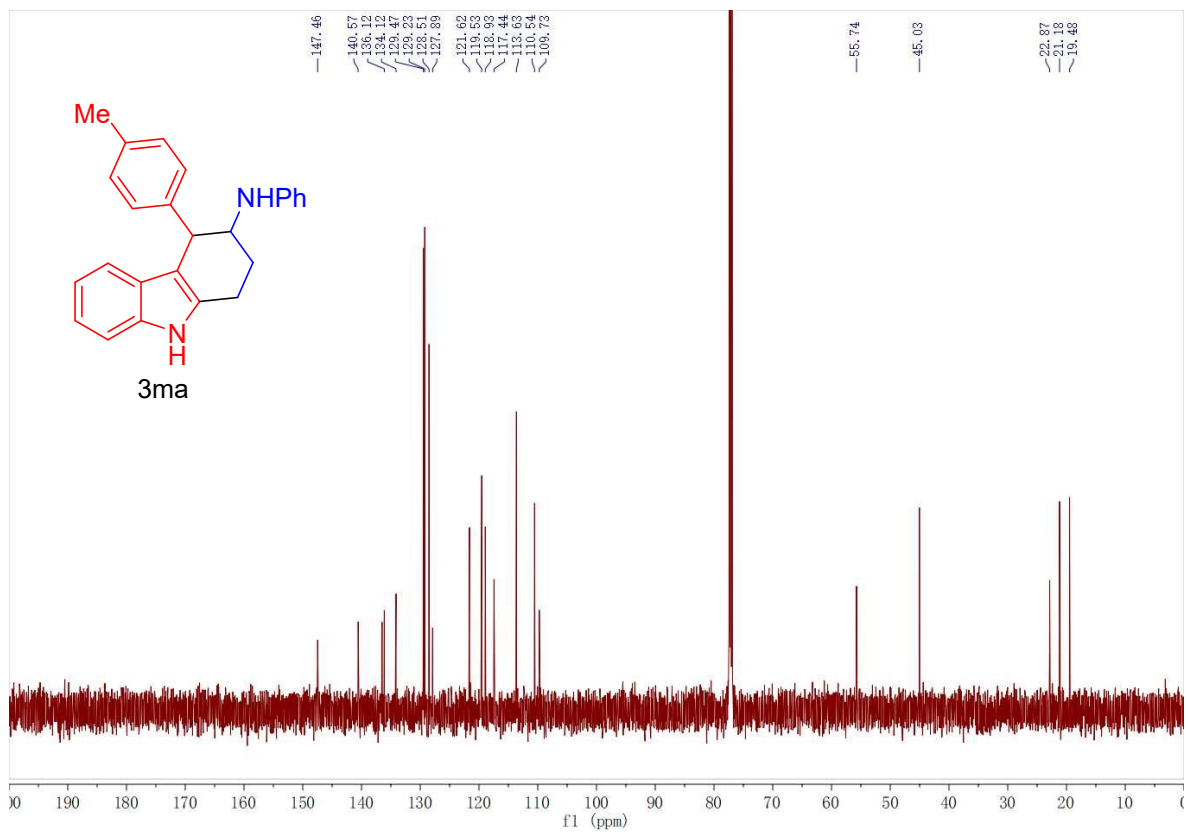

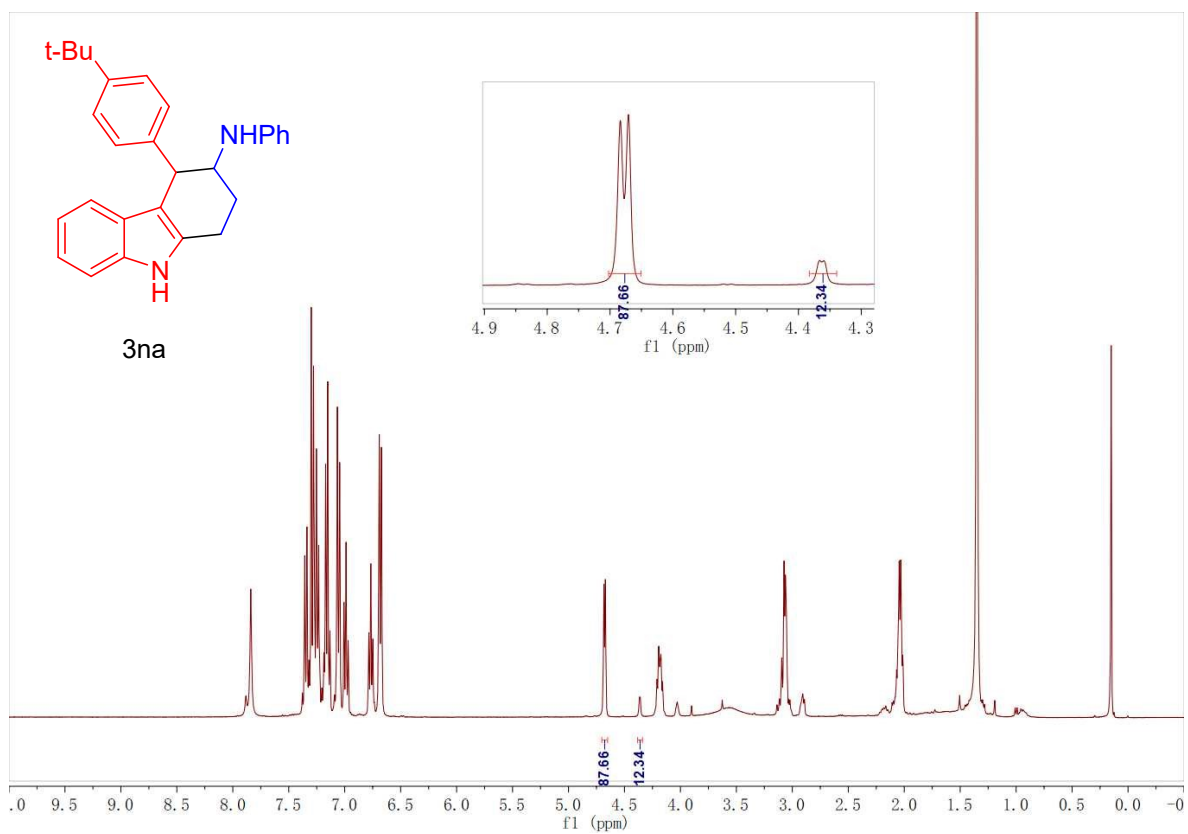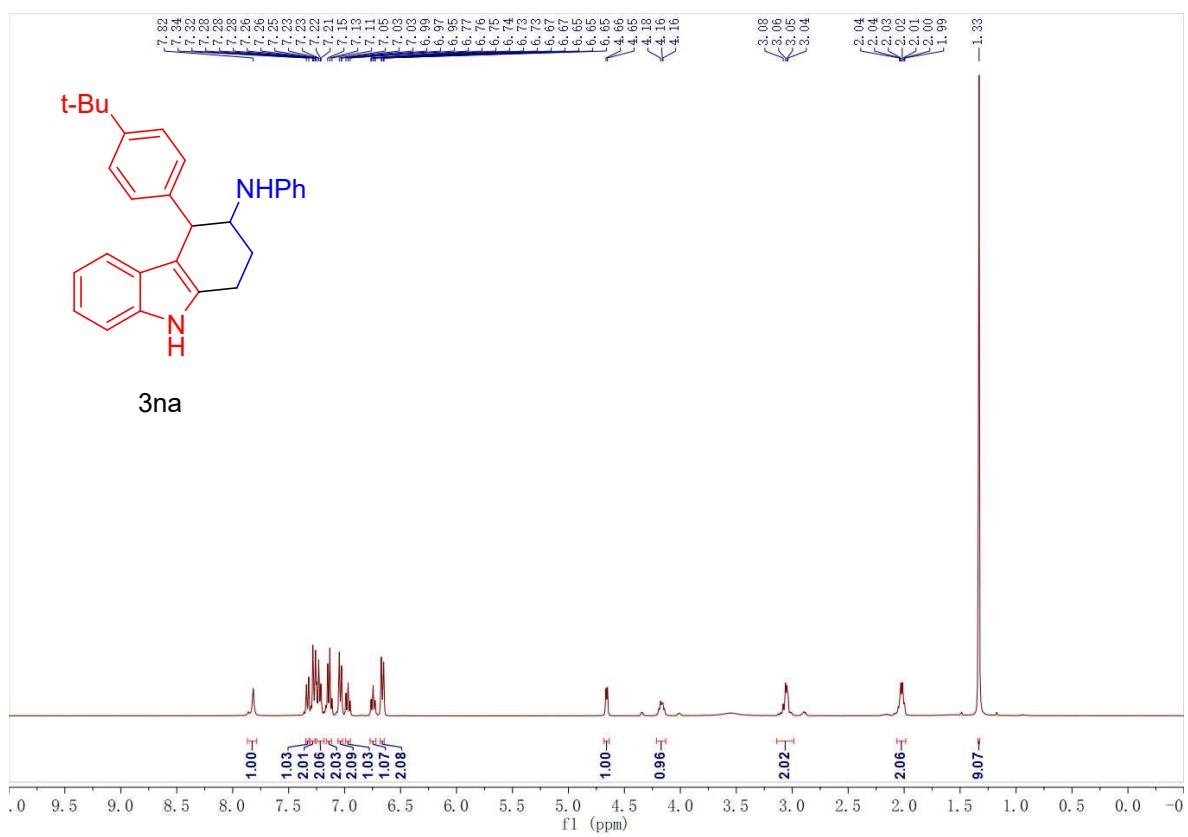

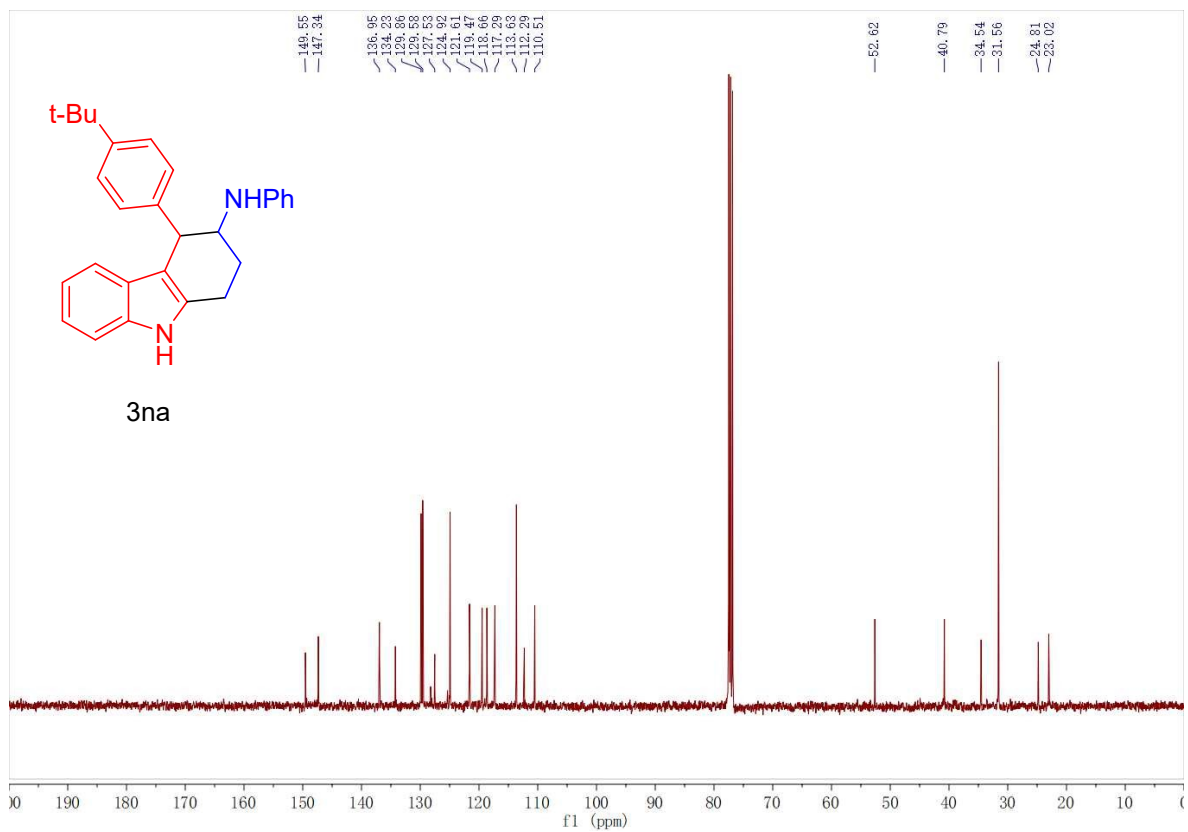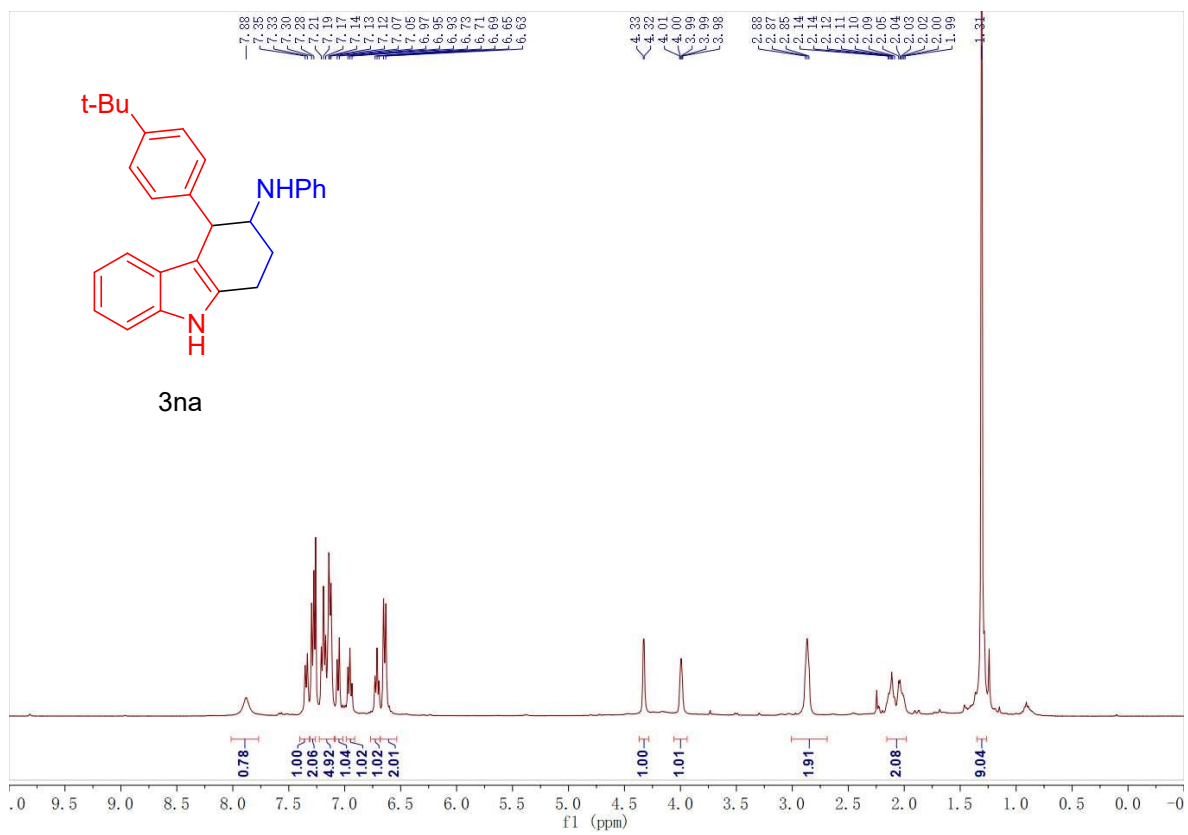

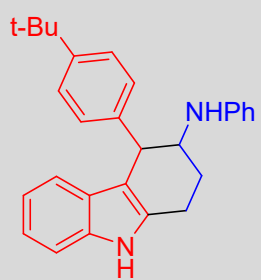

3na

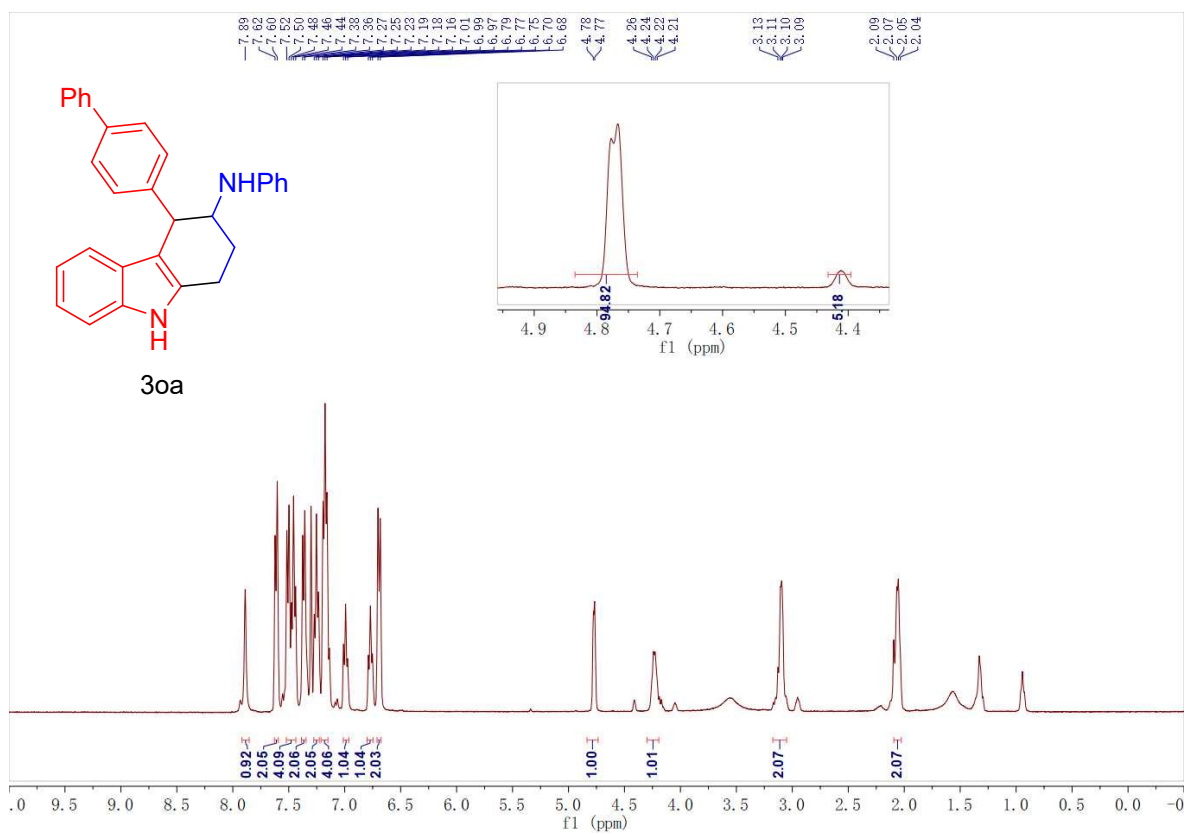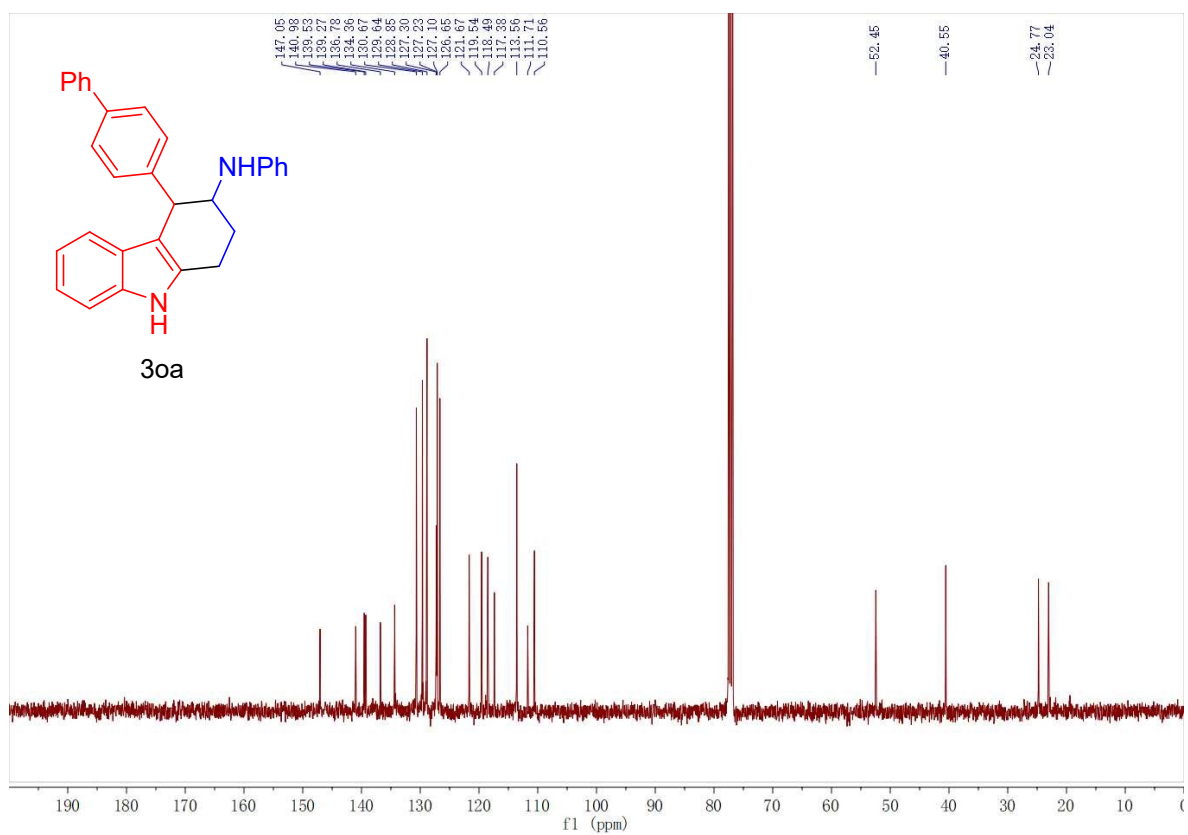

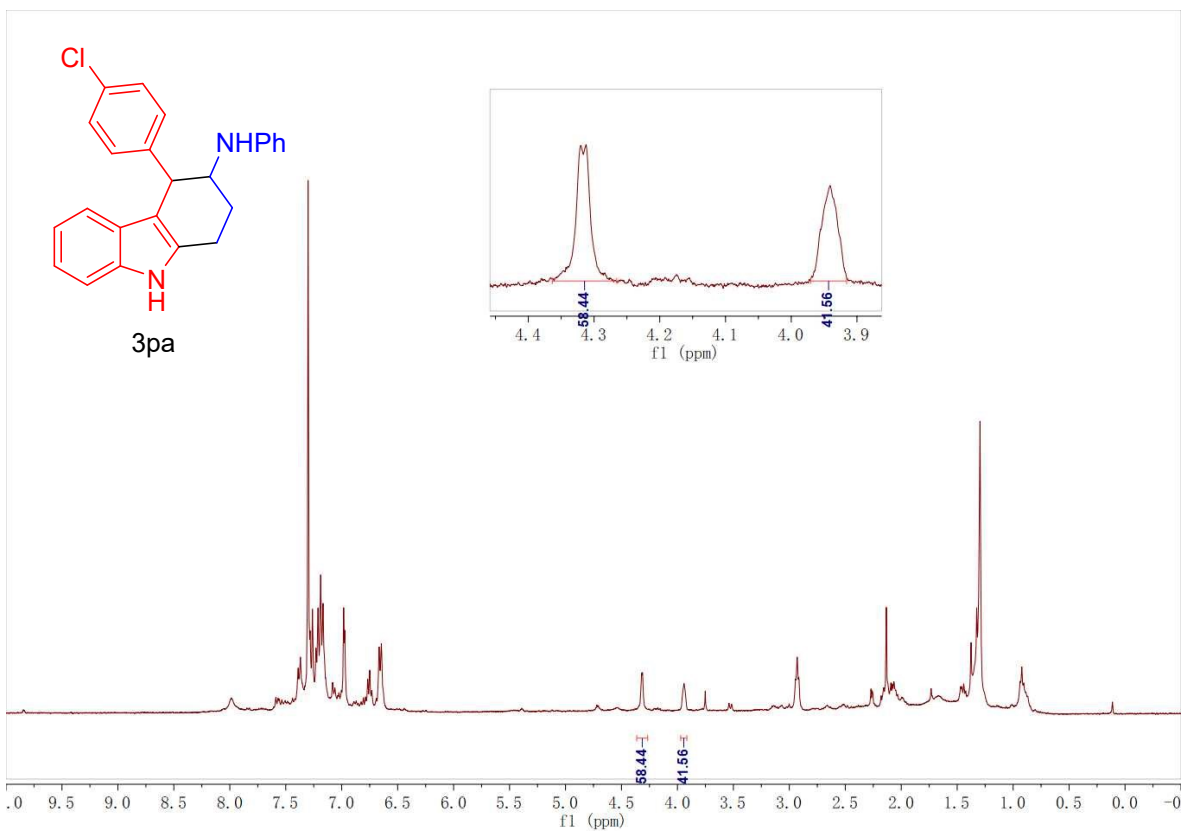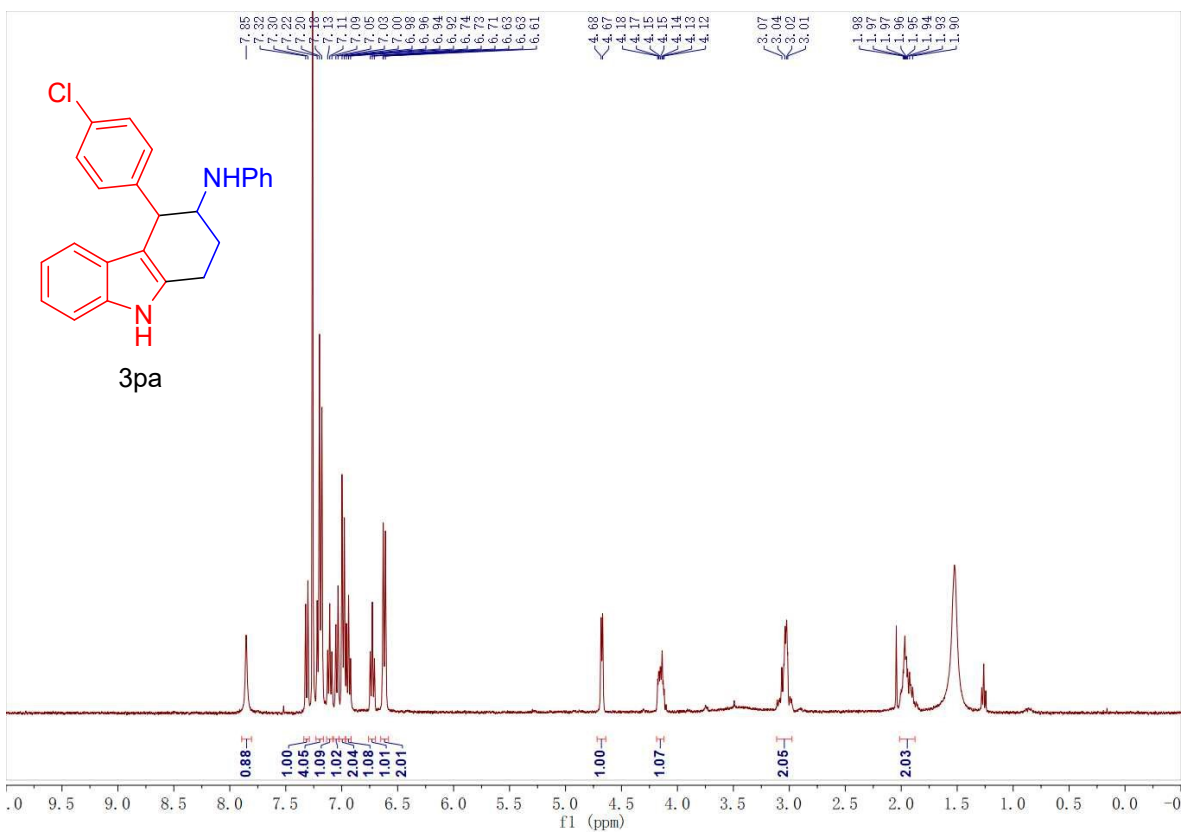

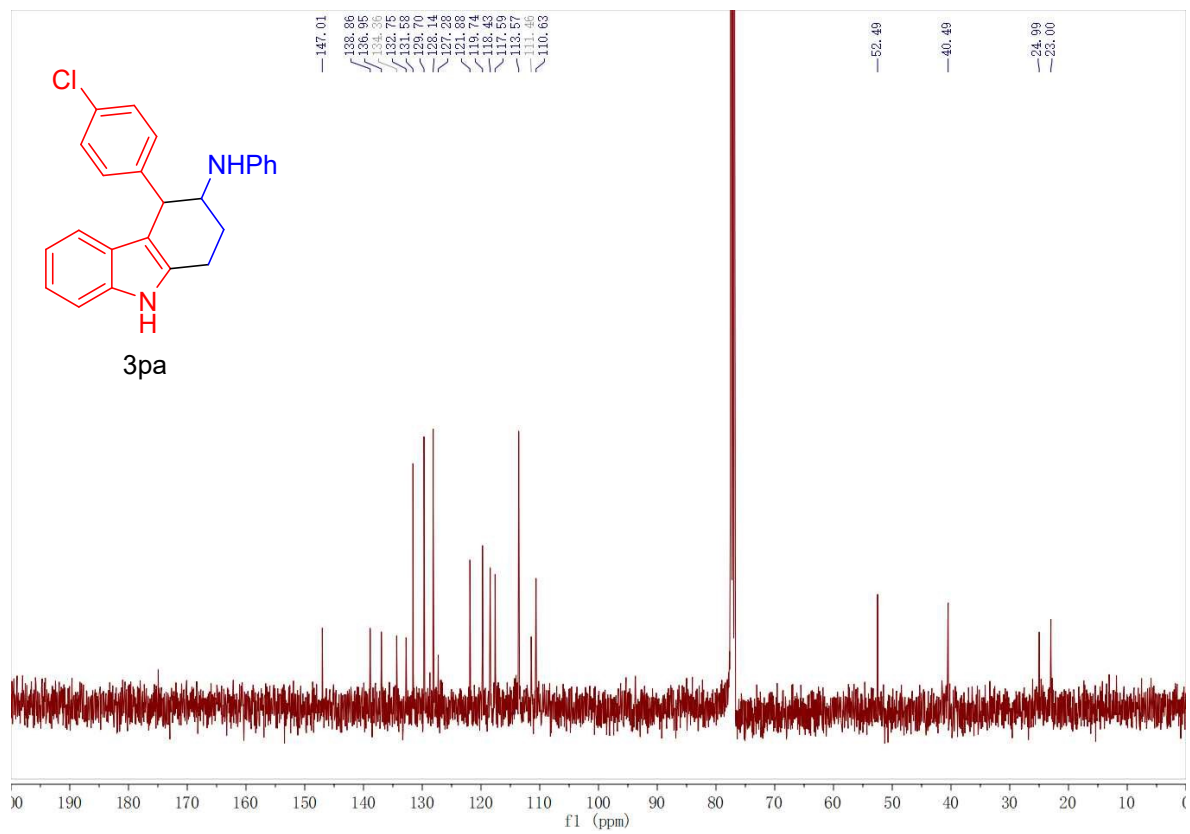



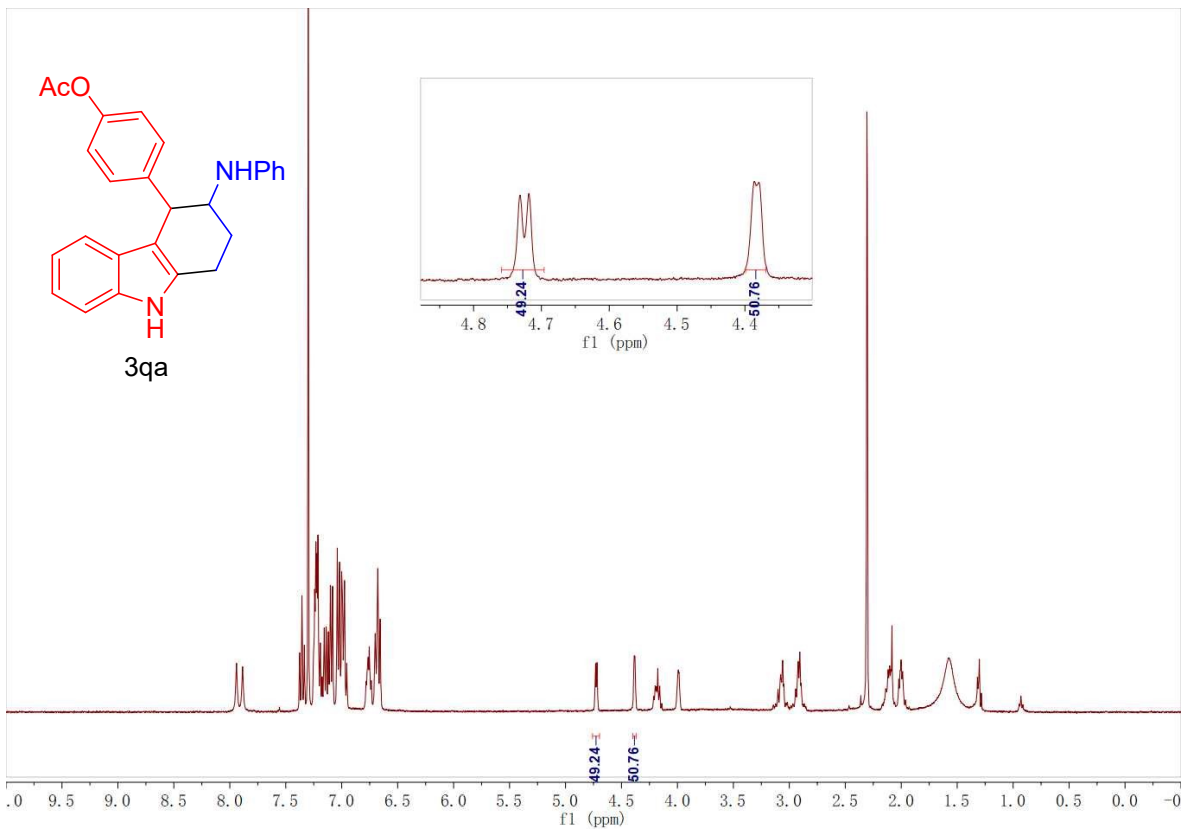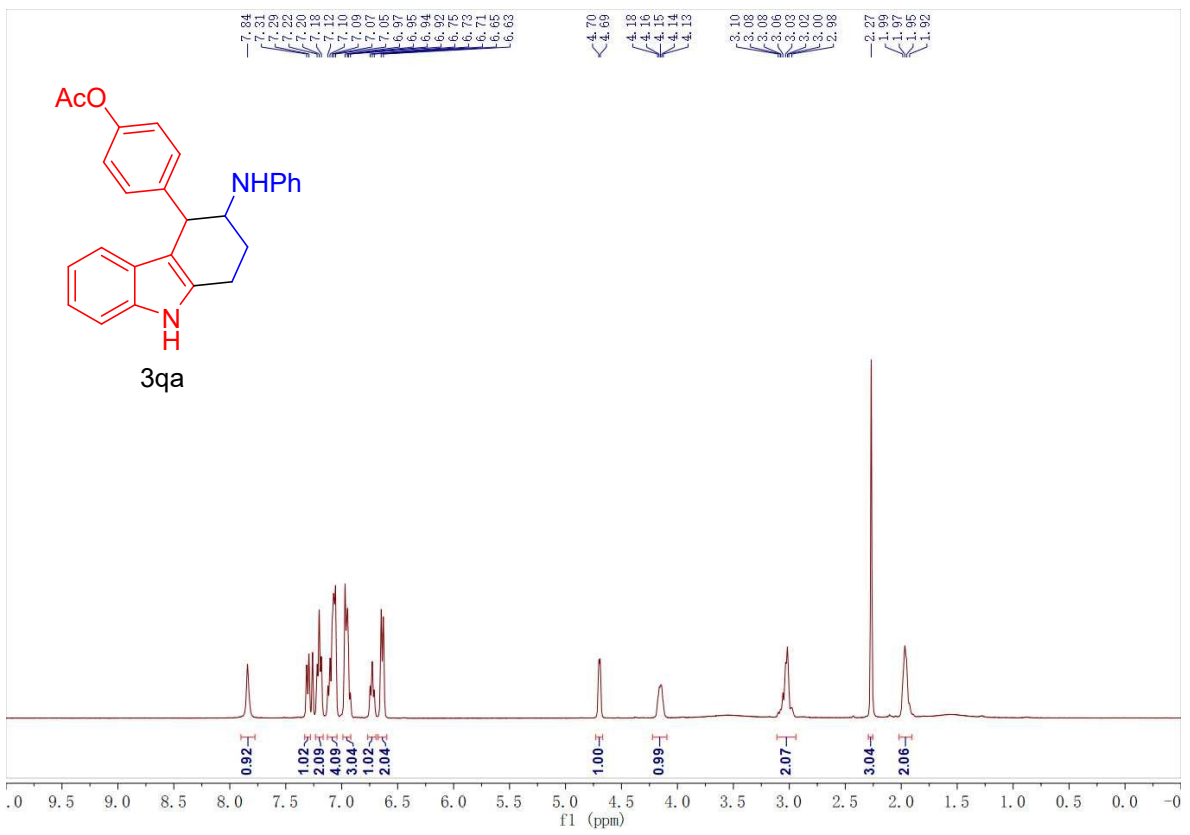

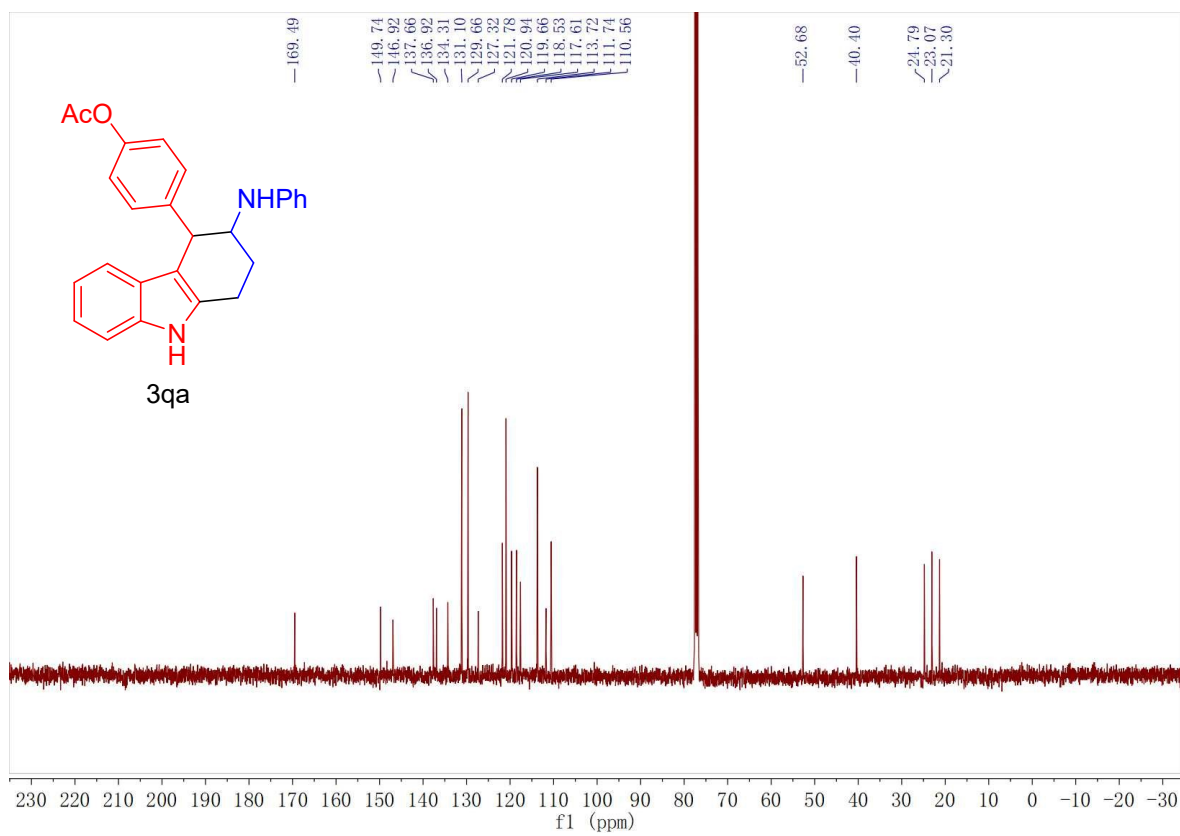

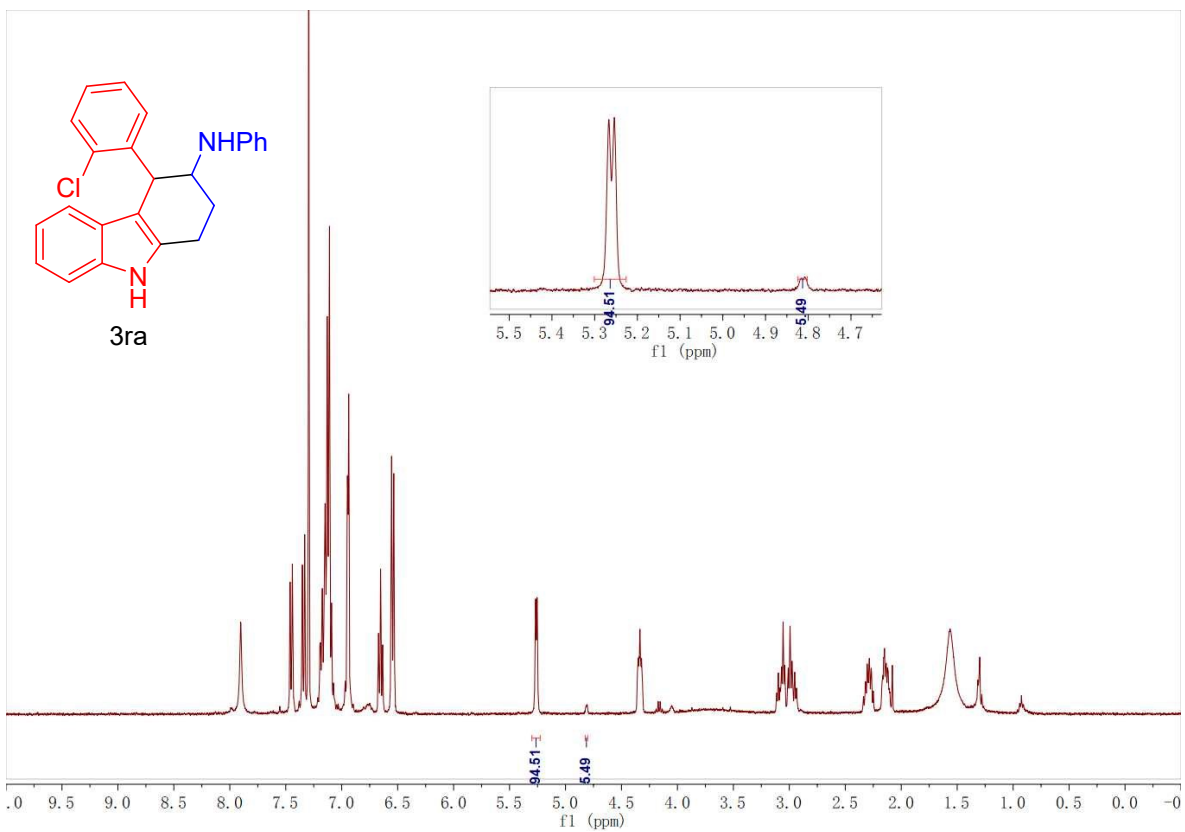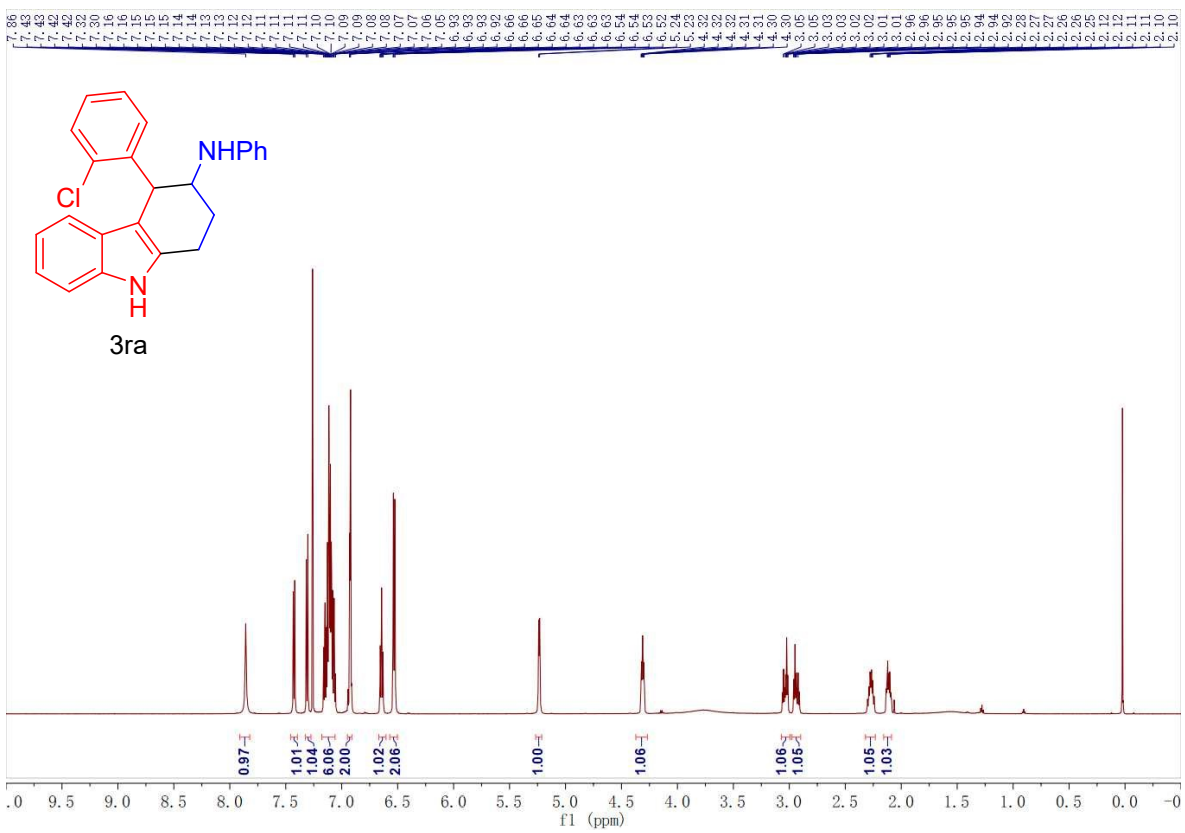

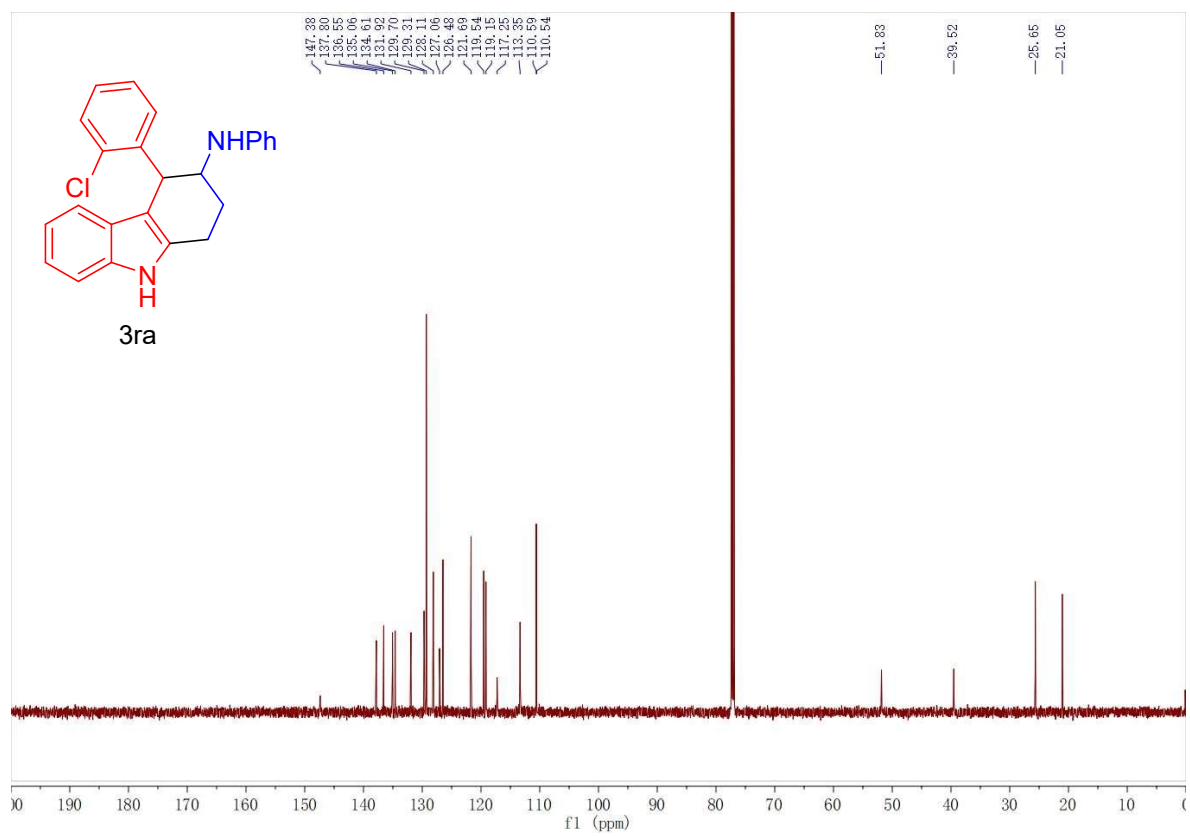

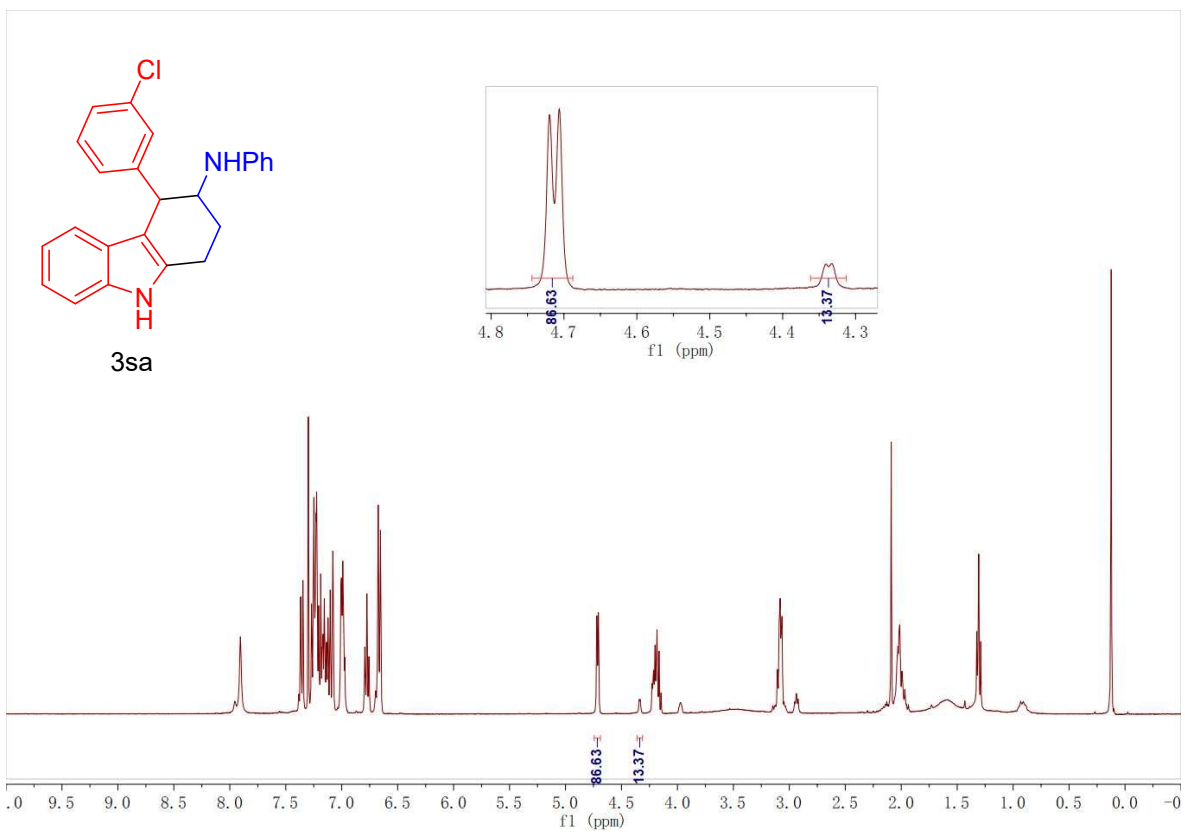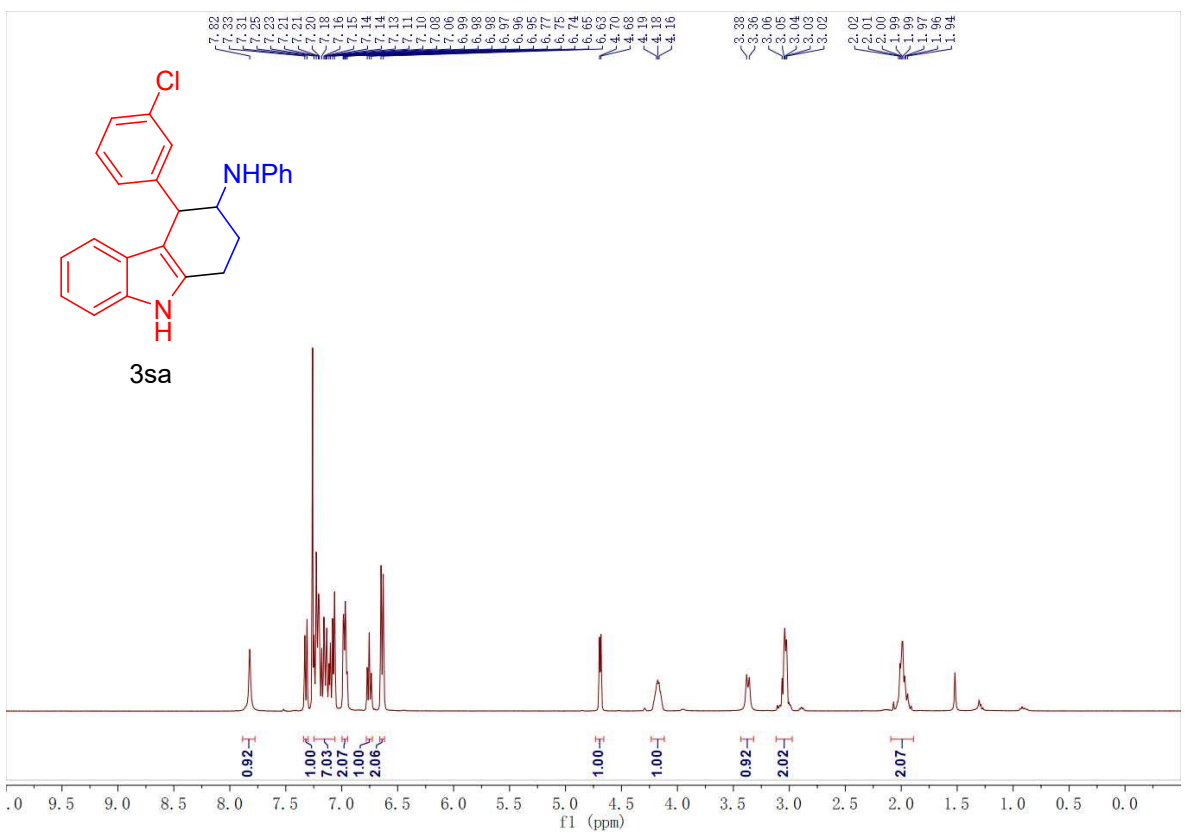

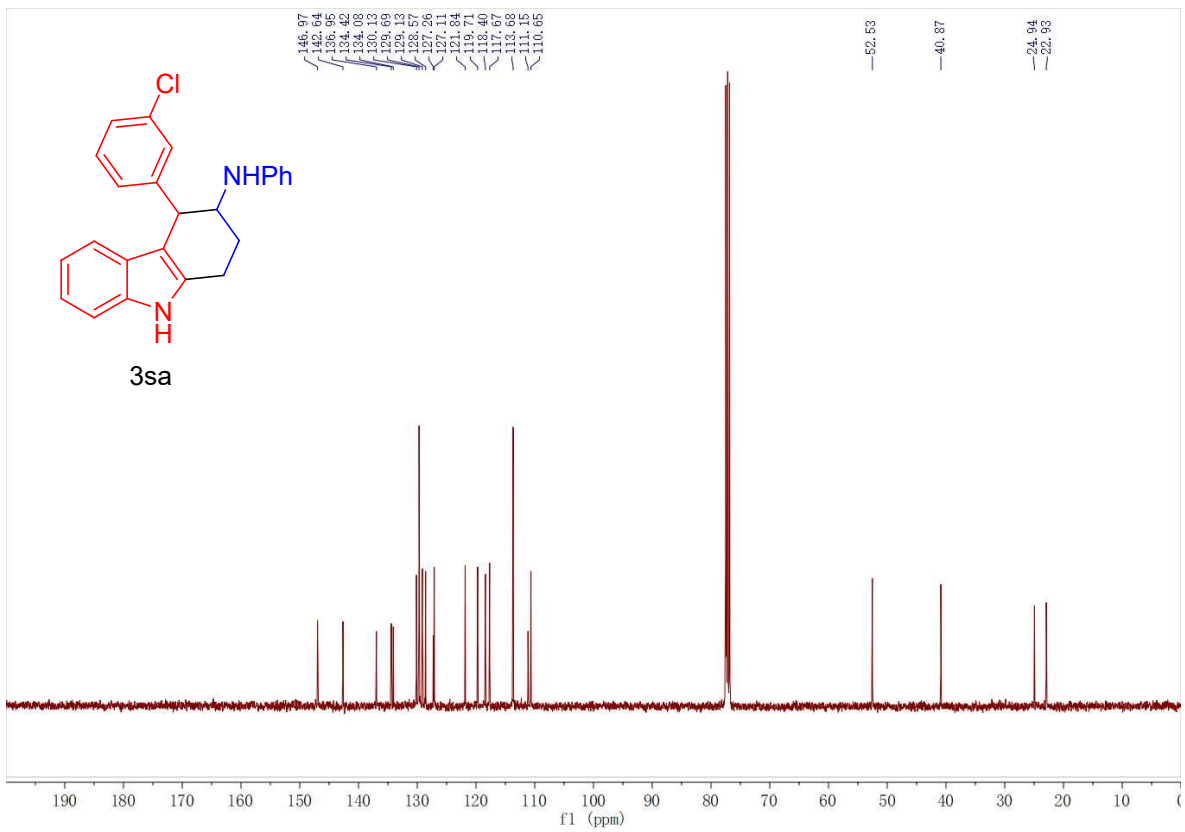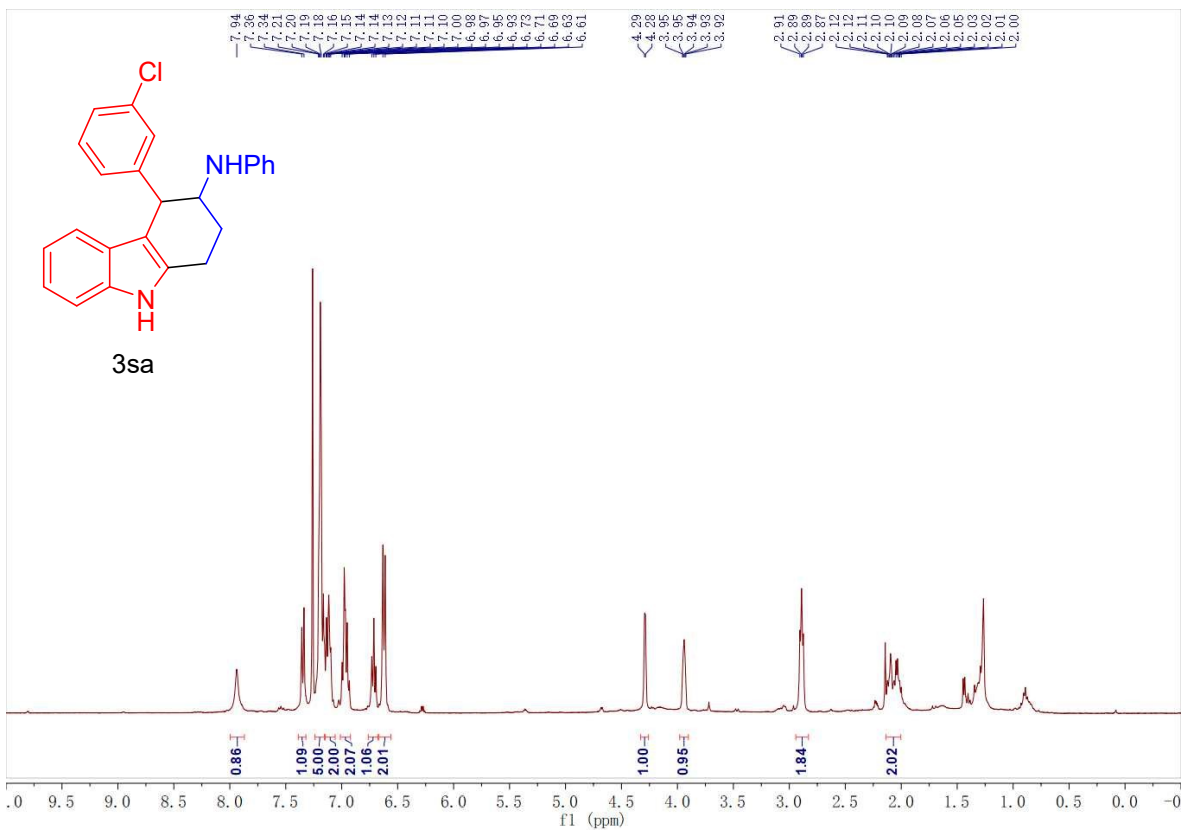

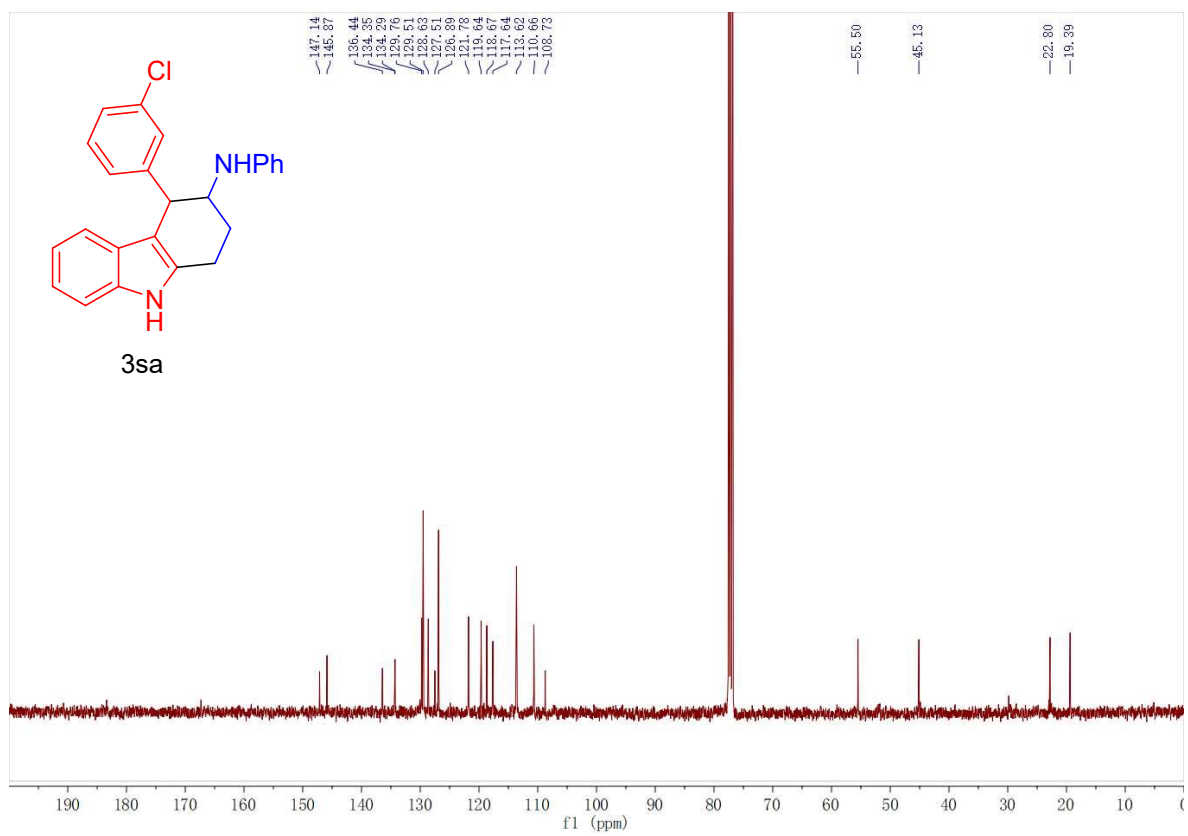

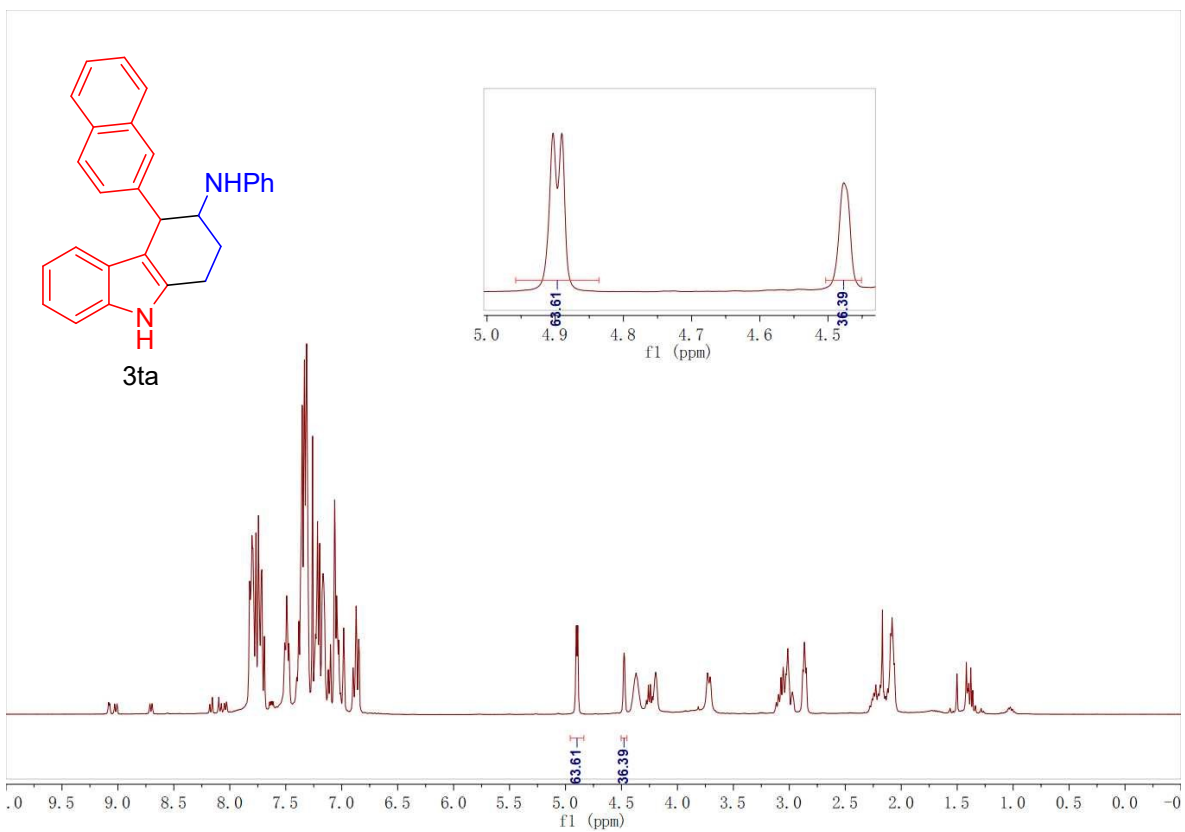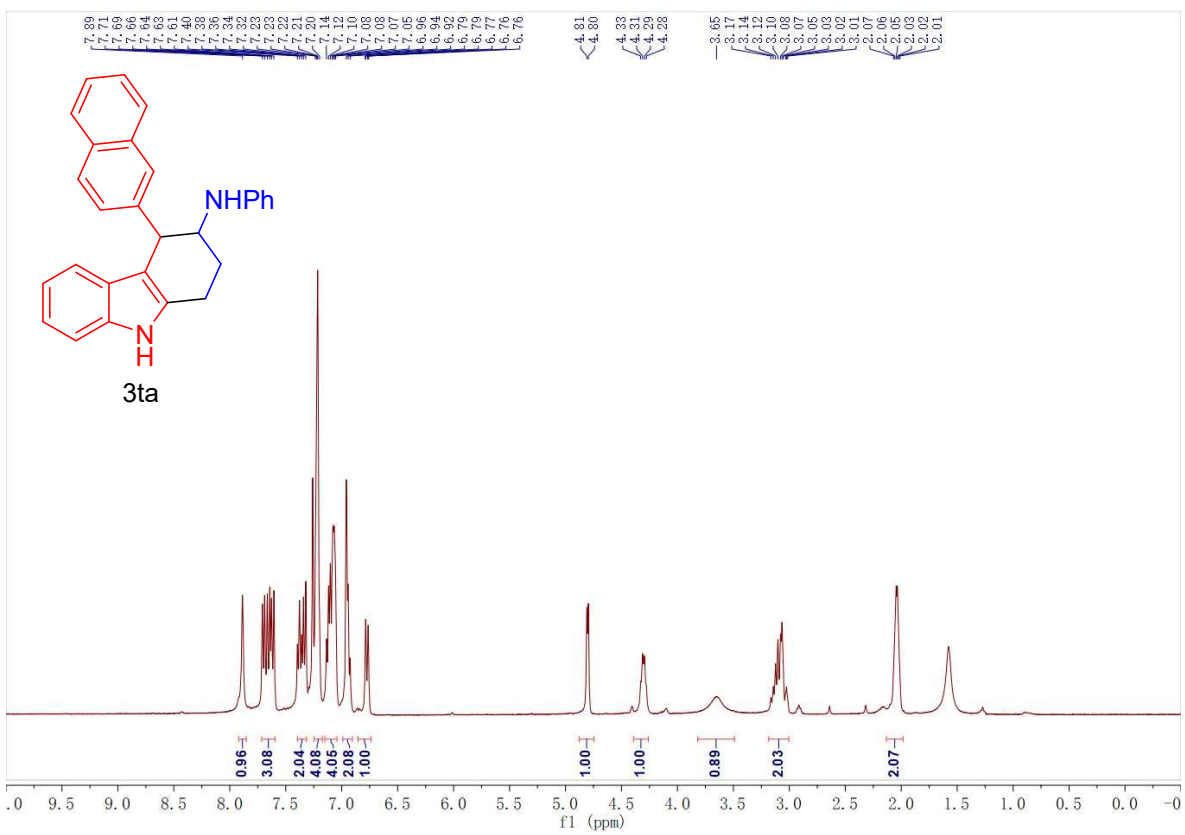



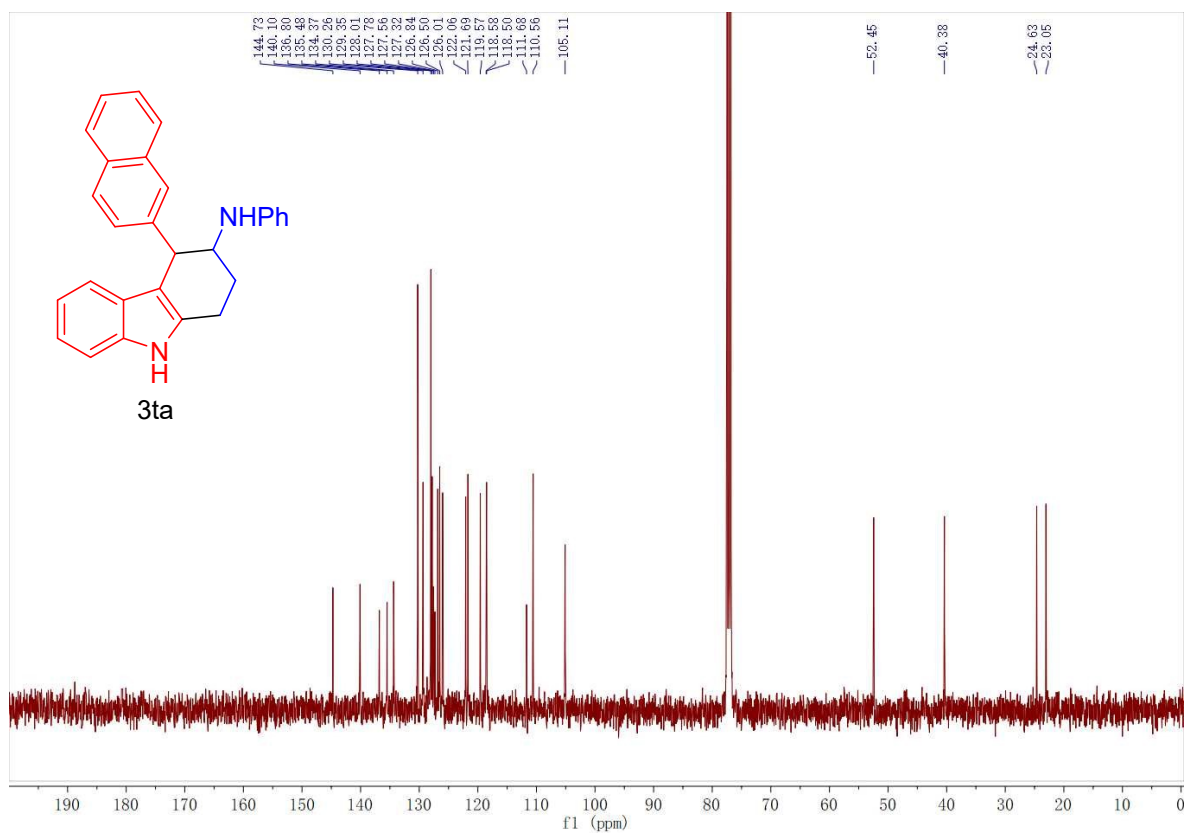

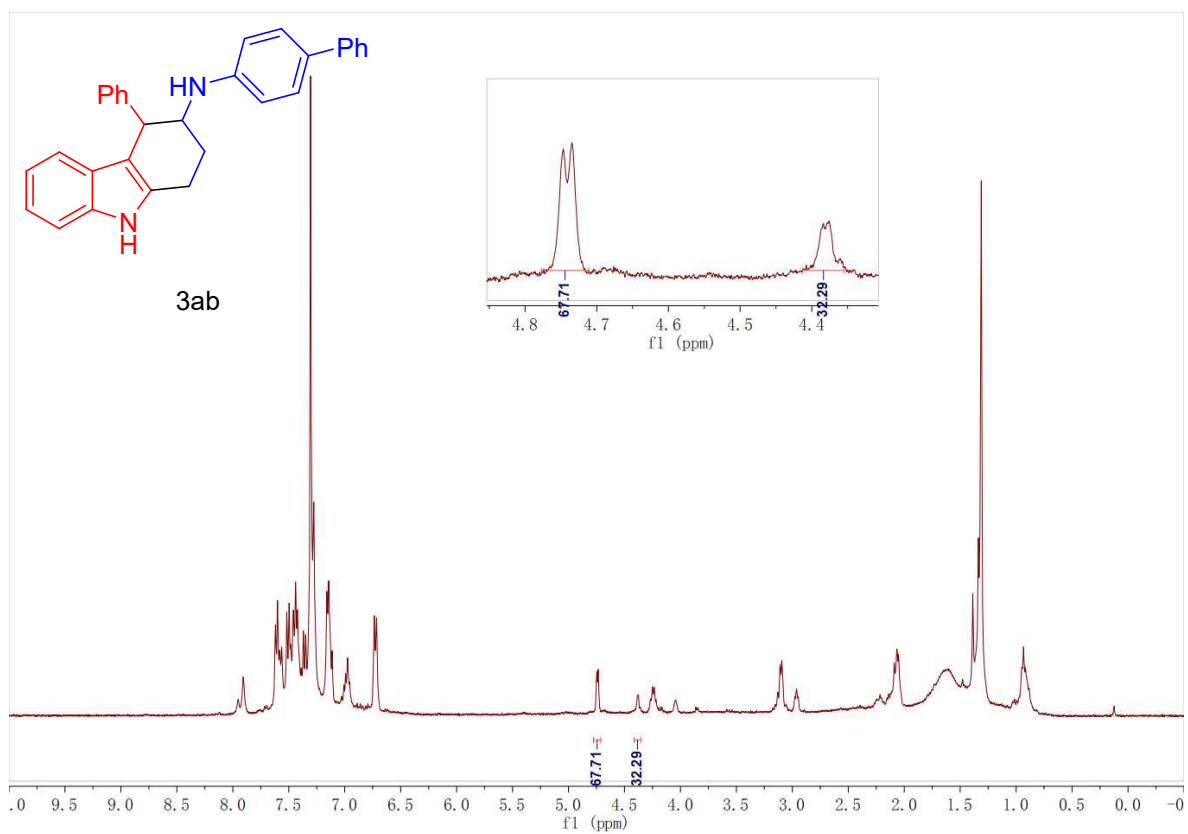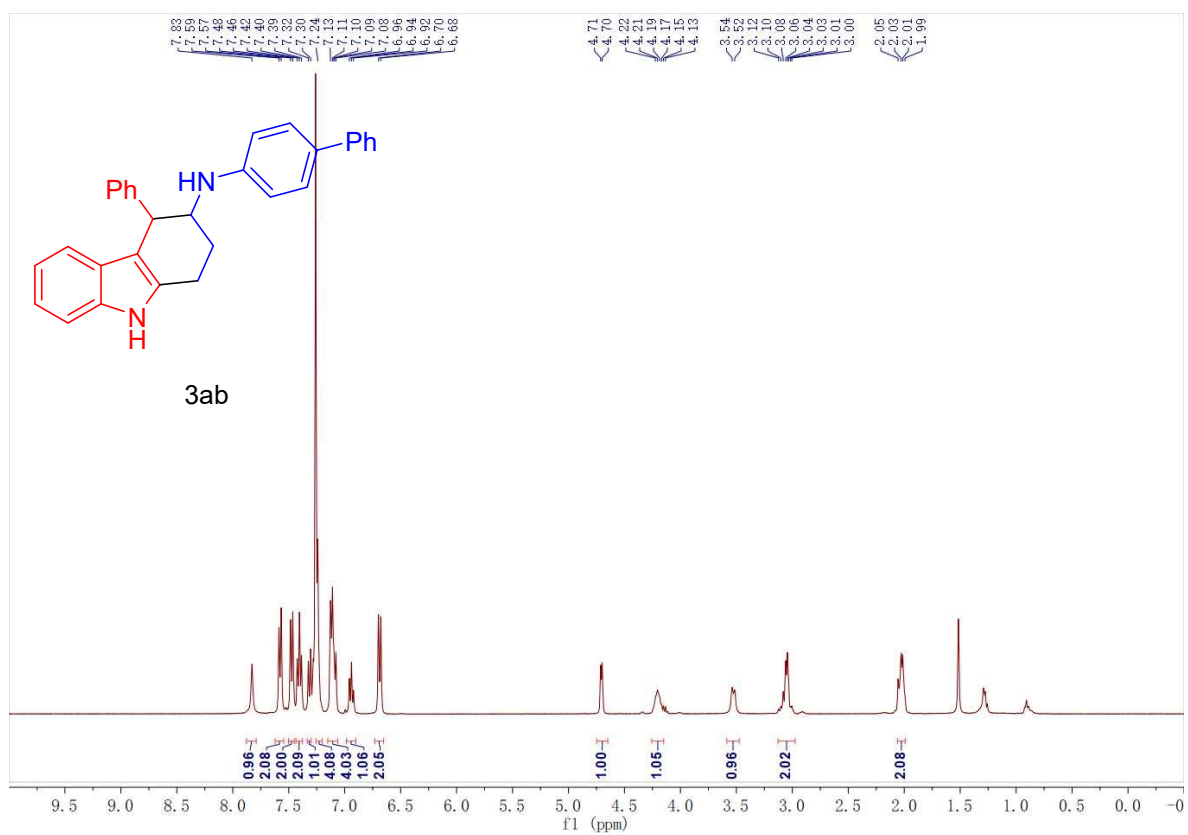

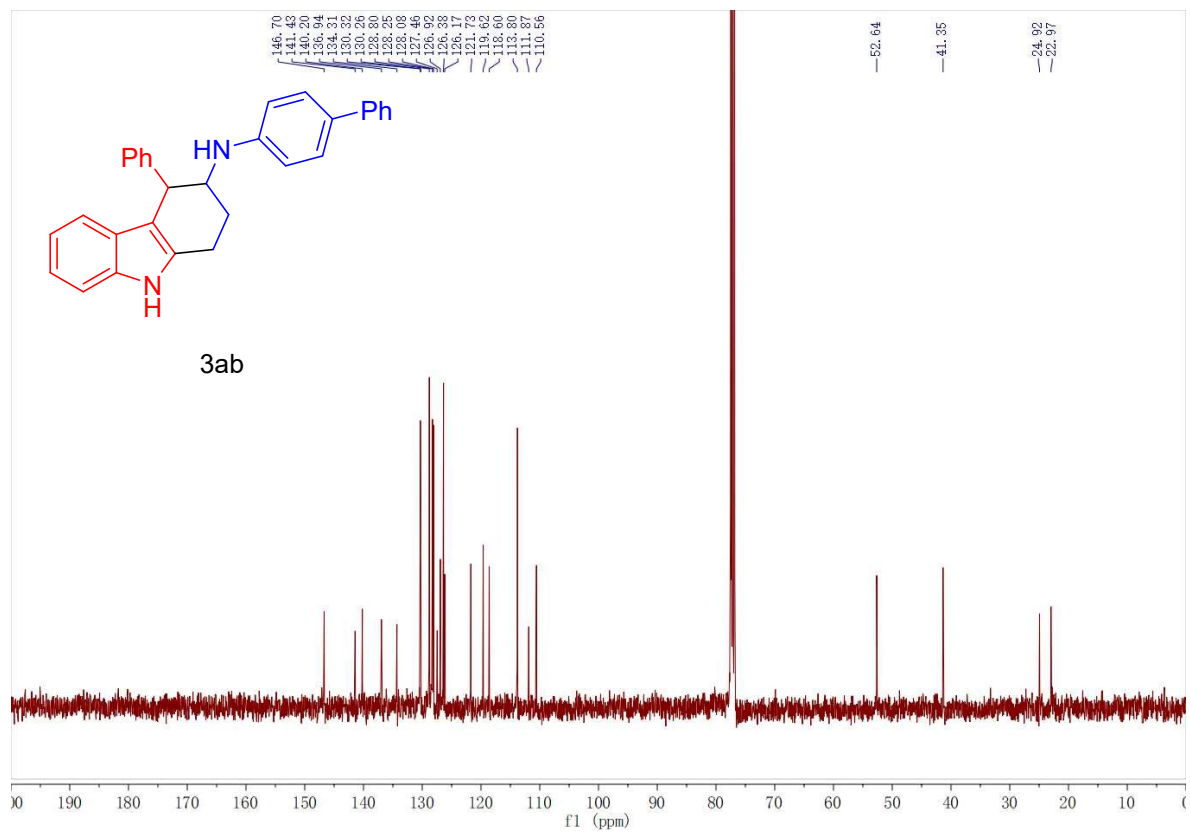

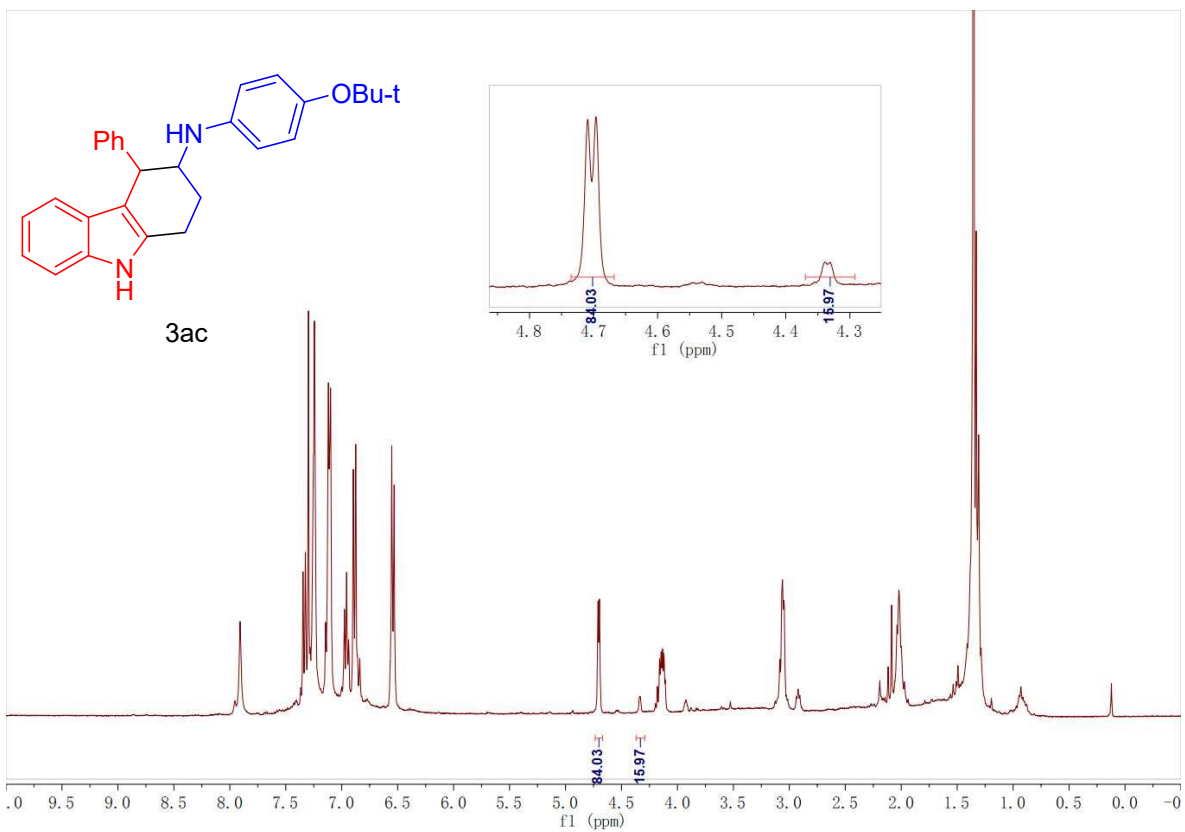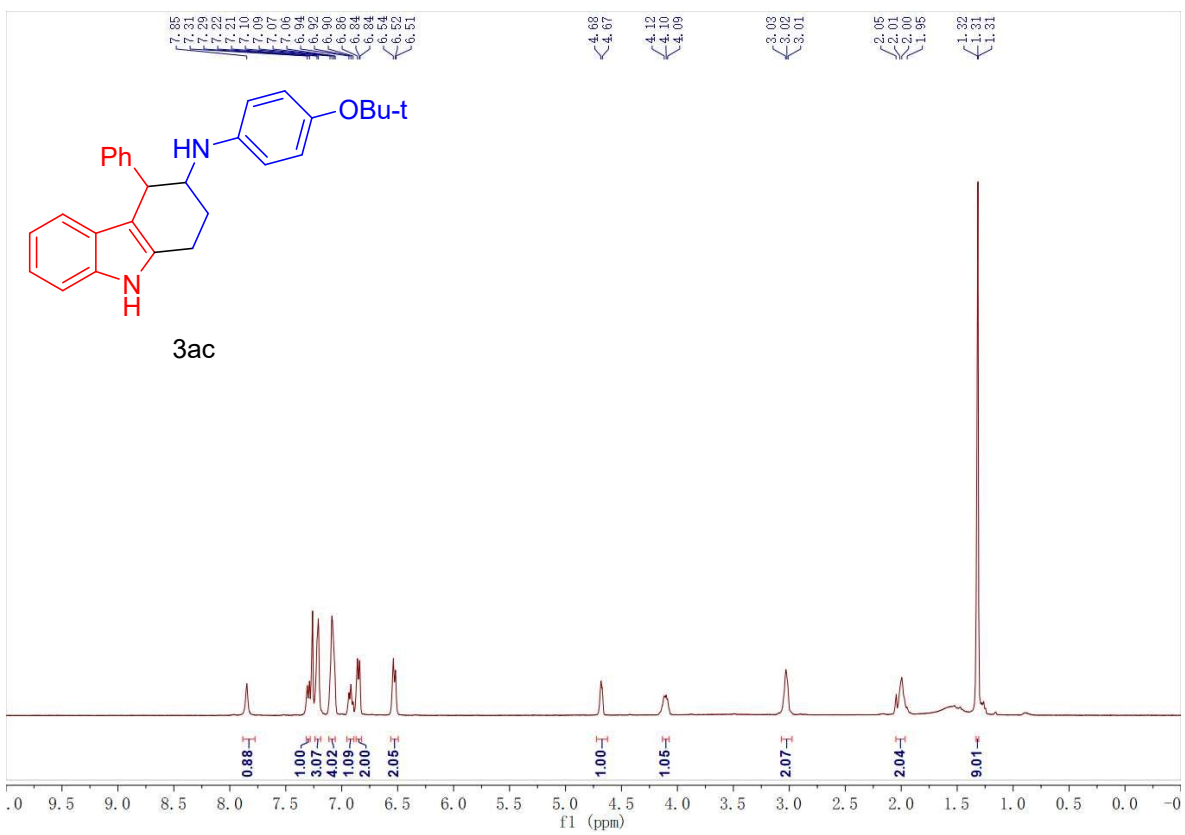

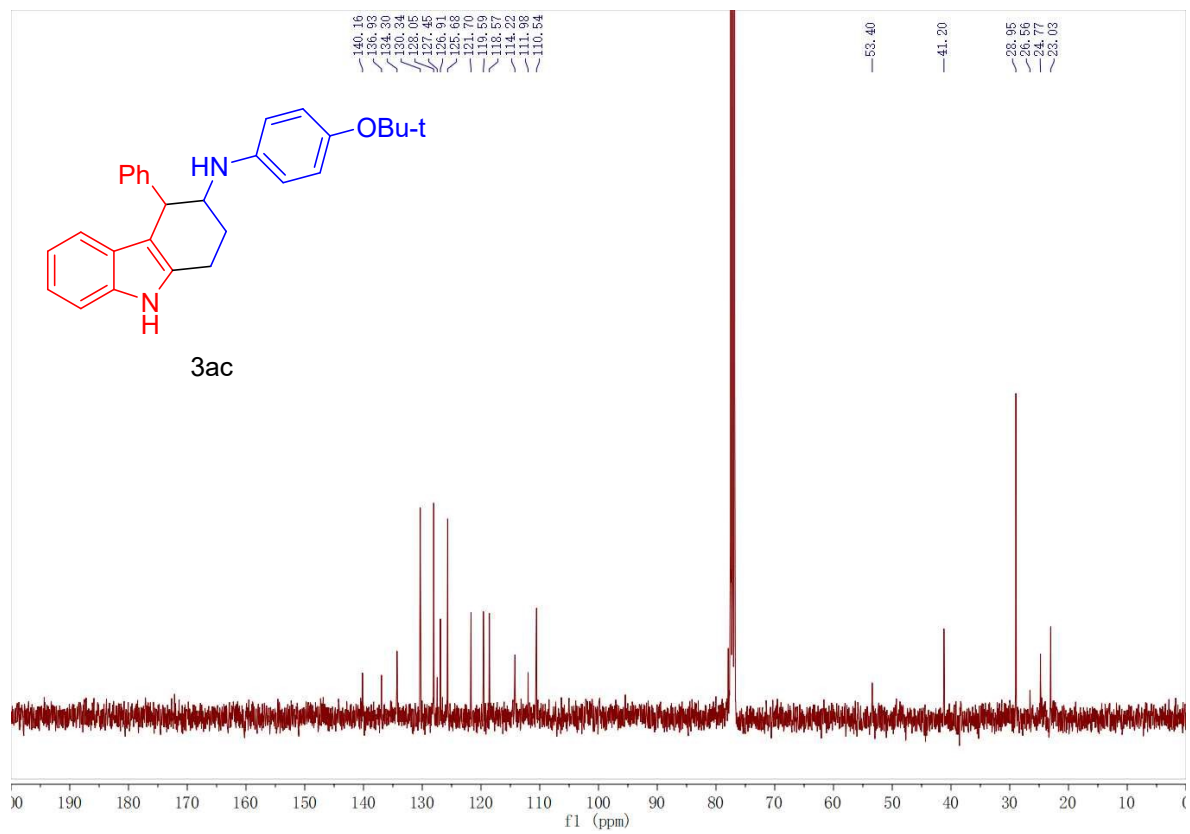

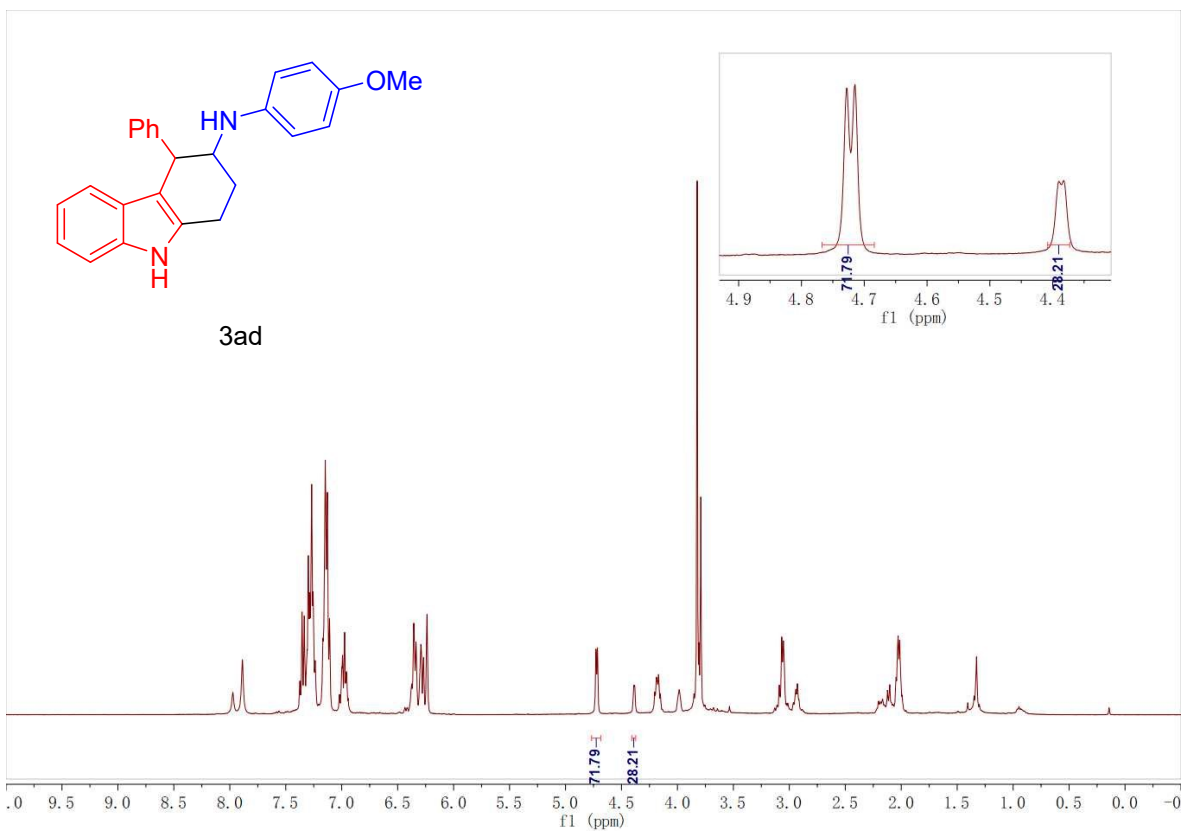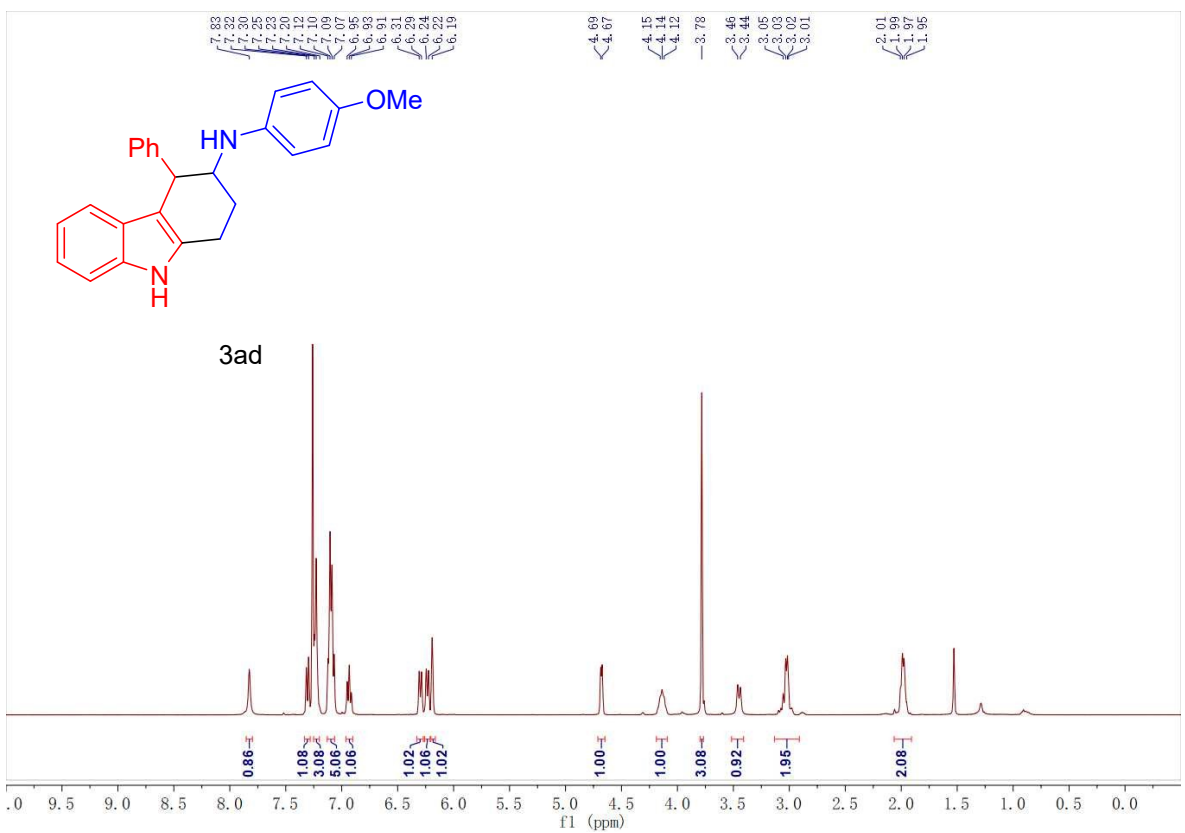

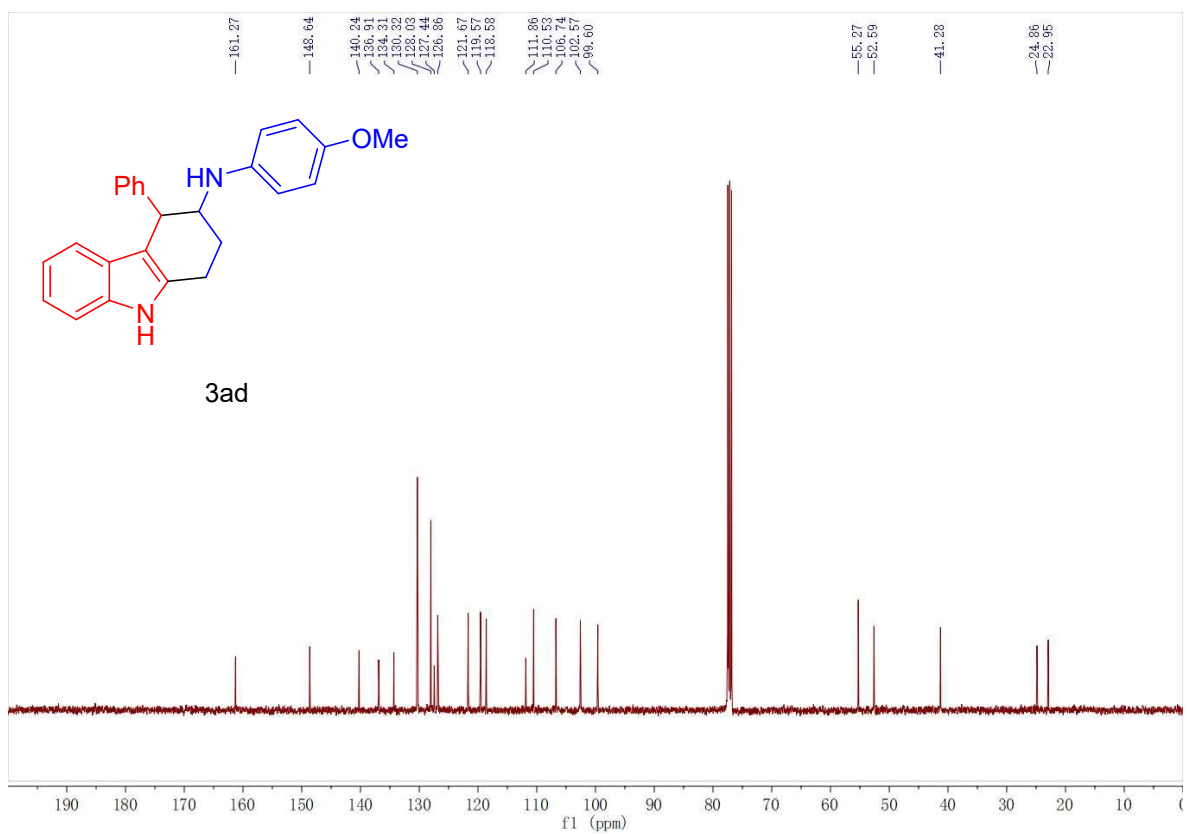

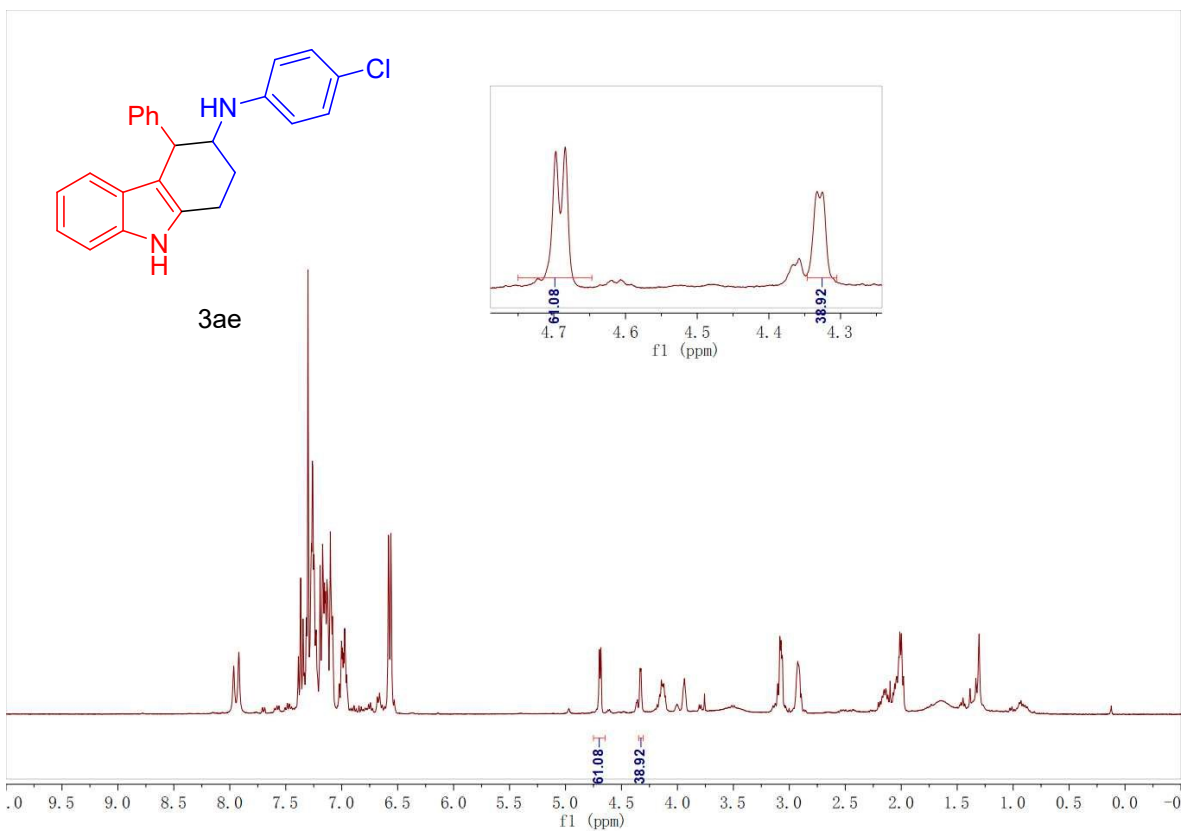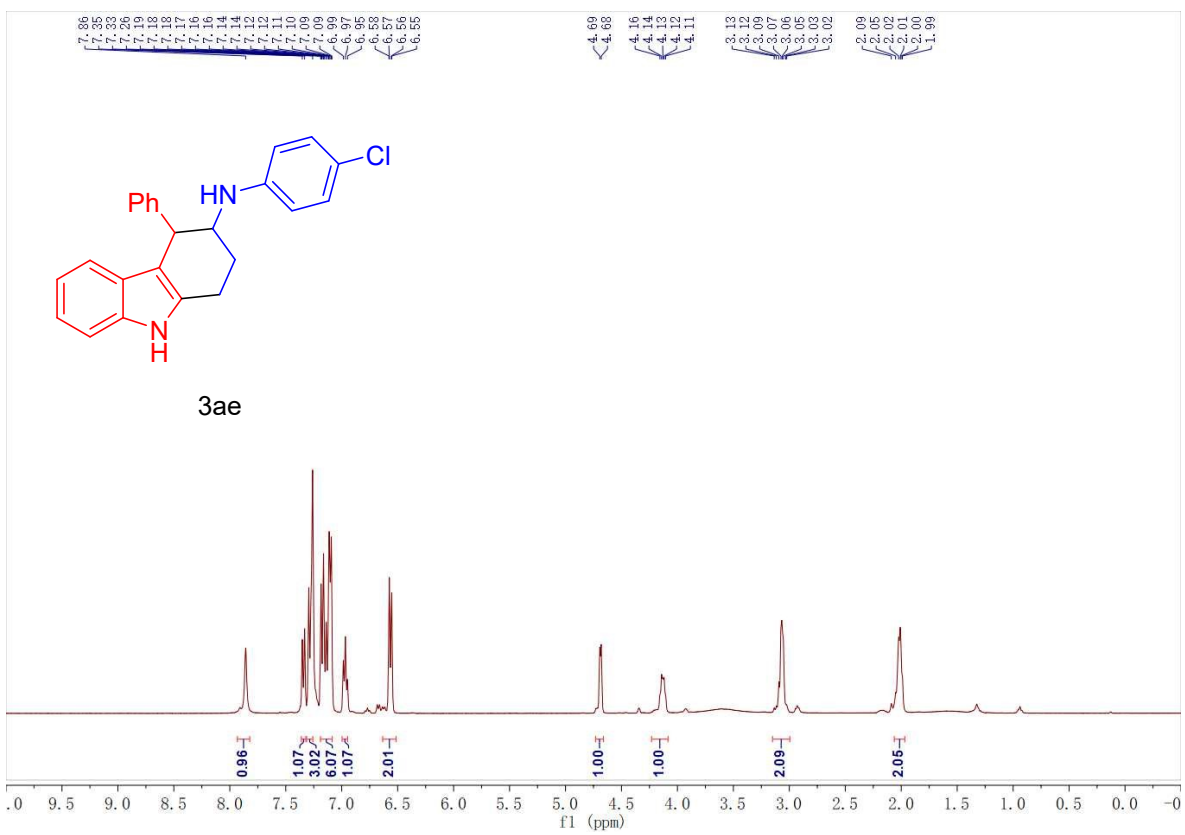



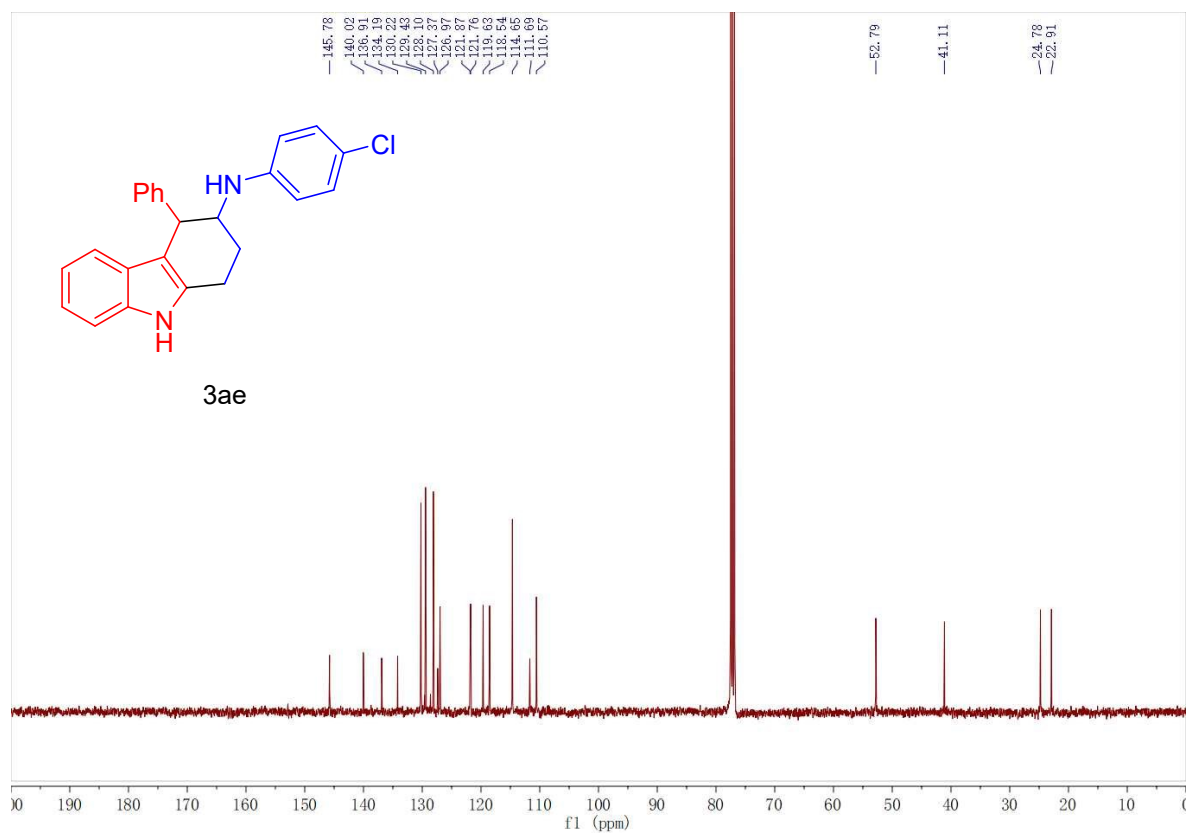

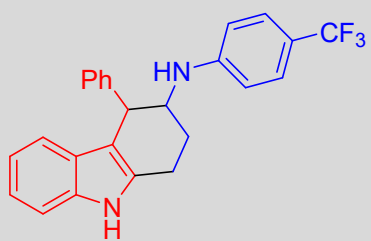

3af

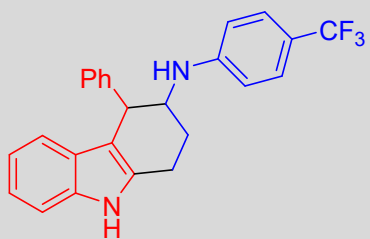

3af

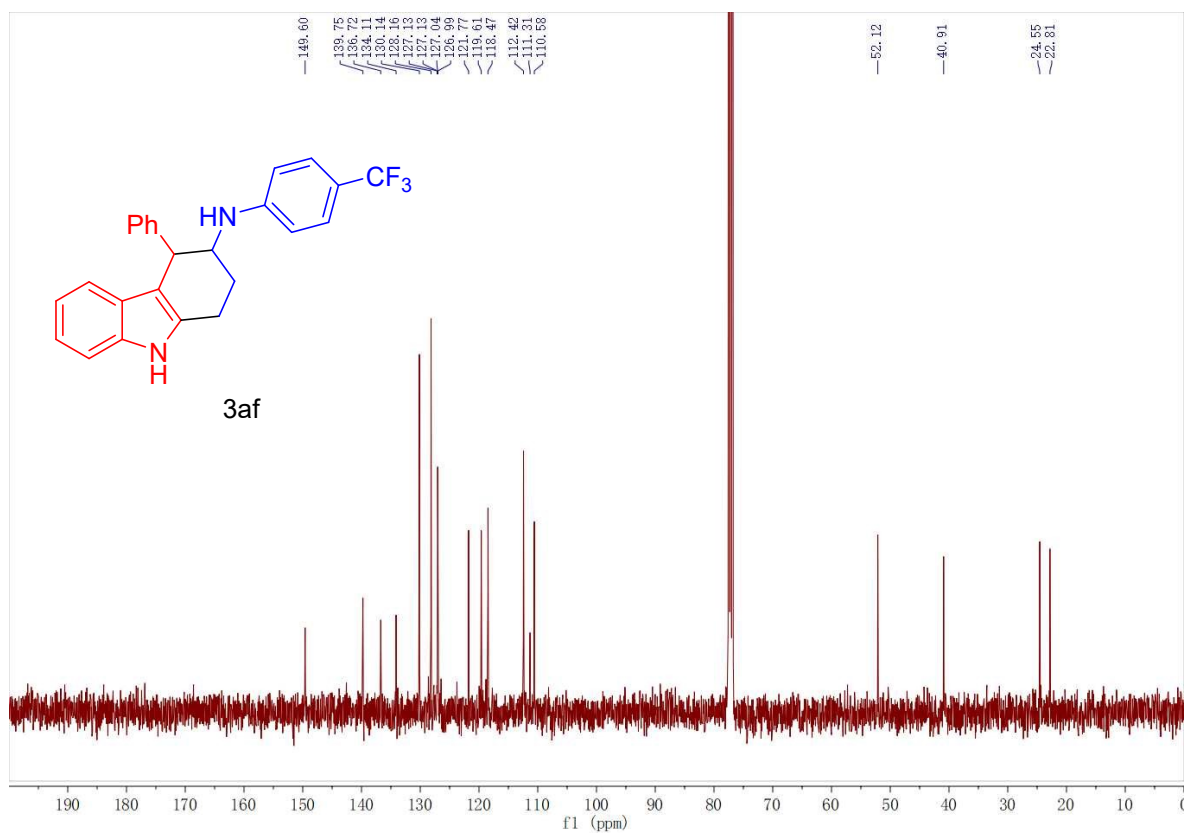

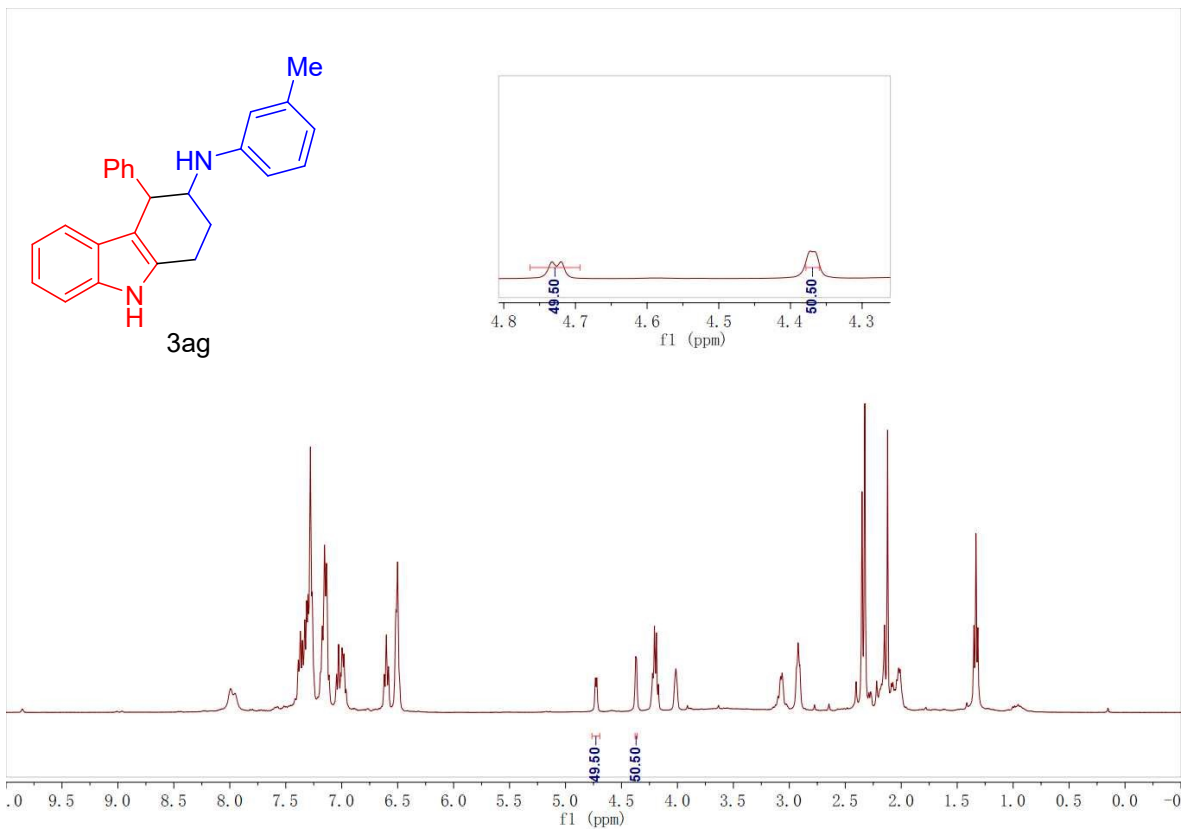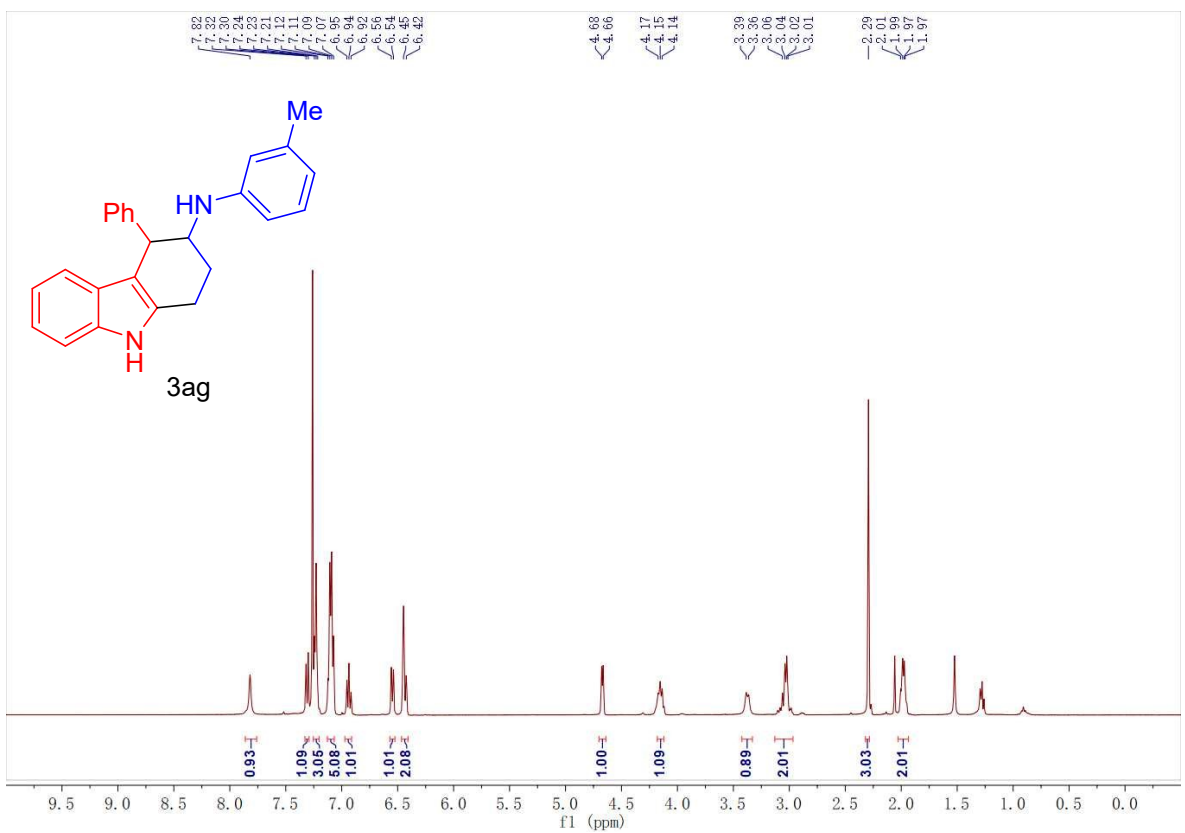

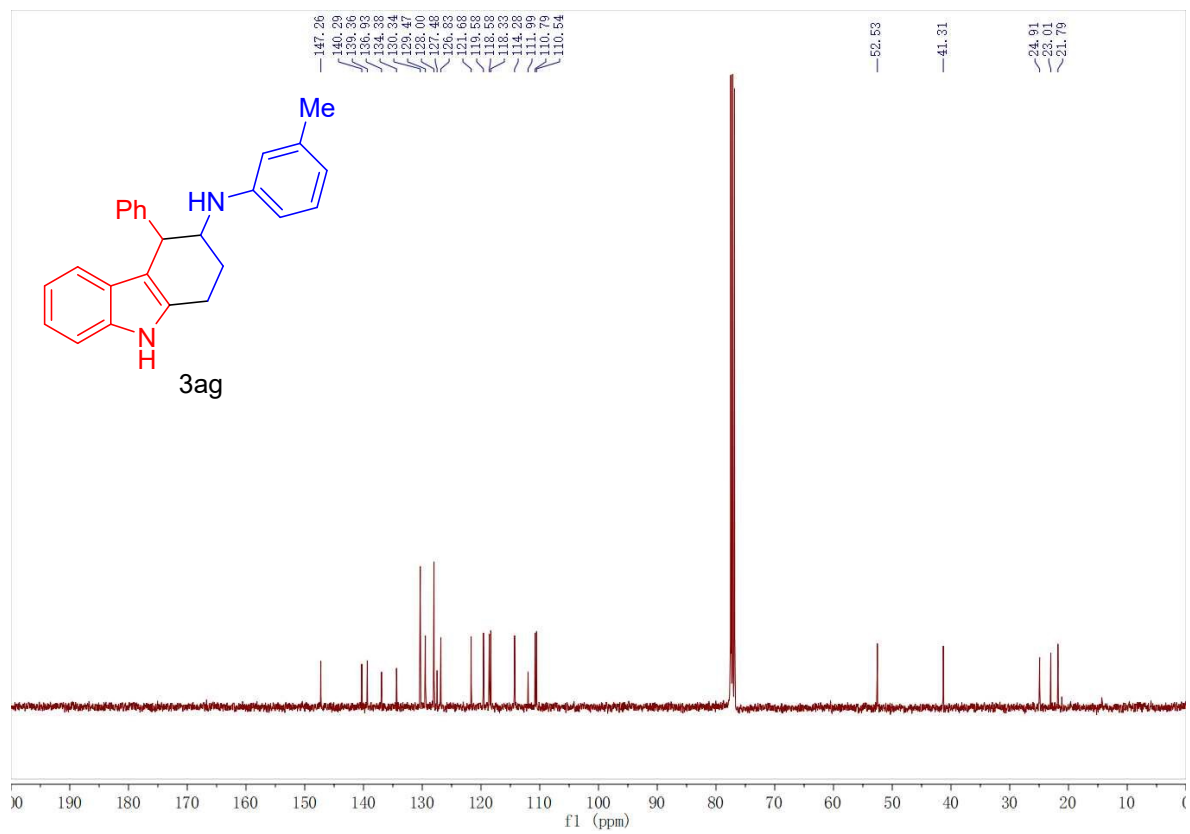

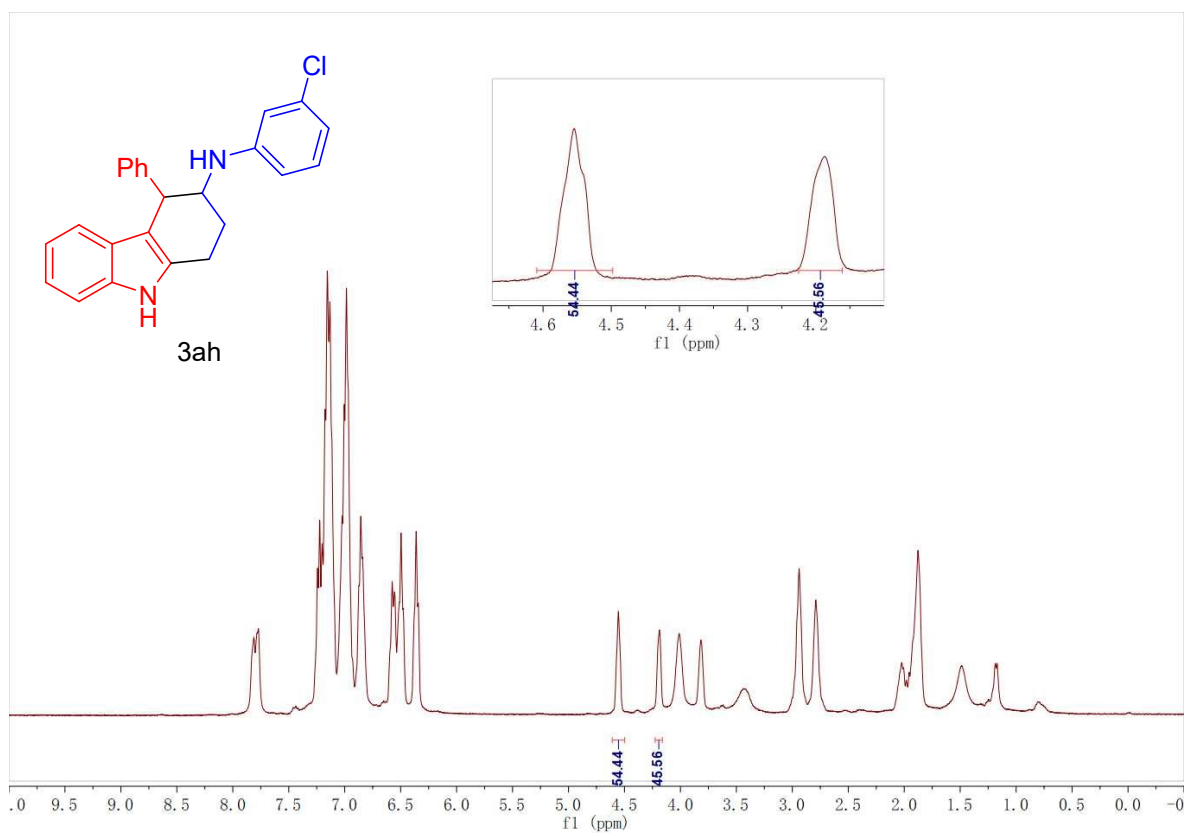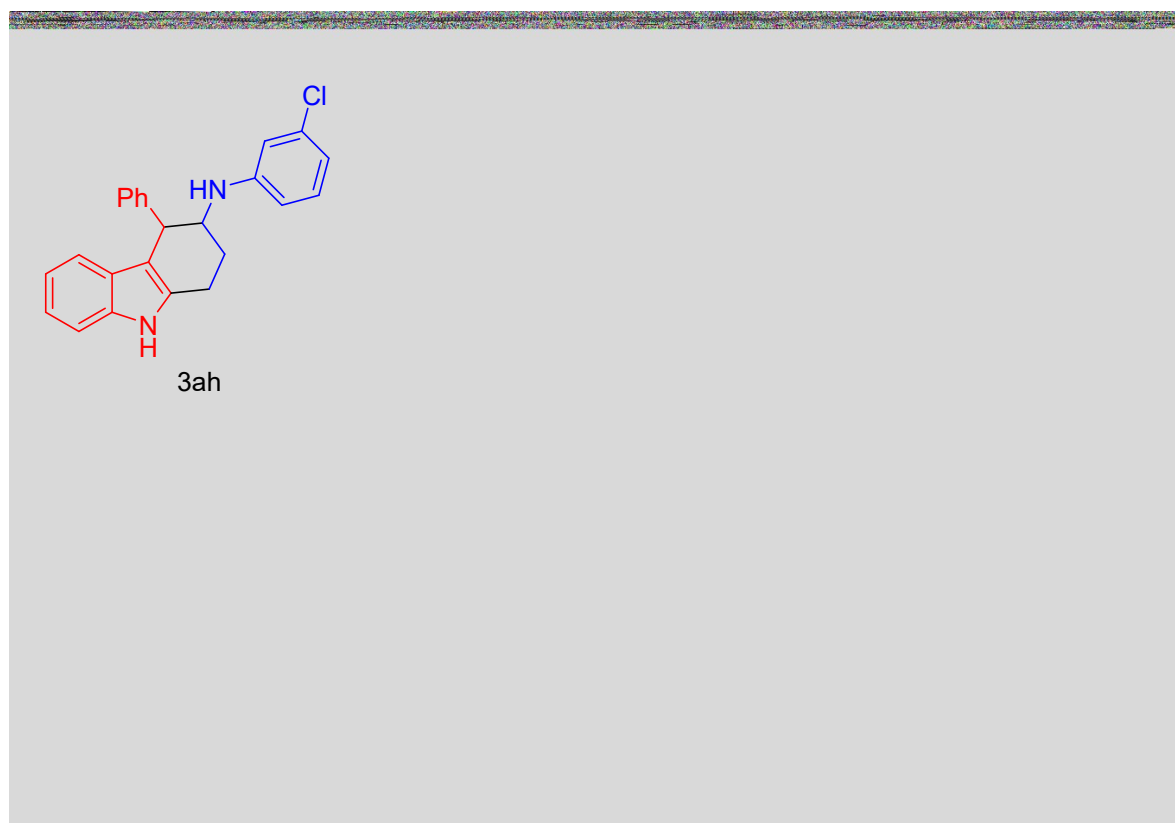

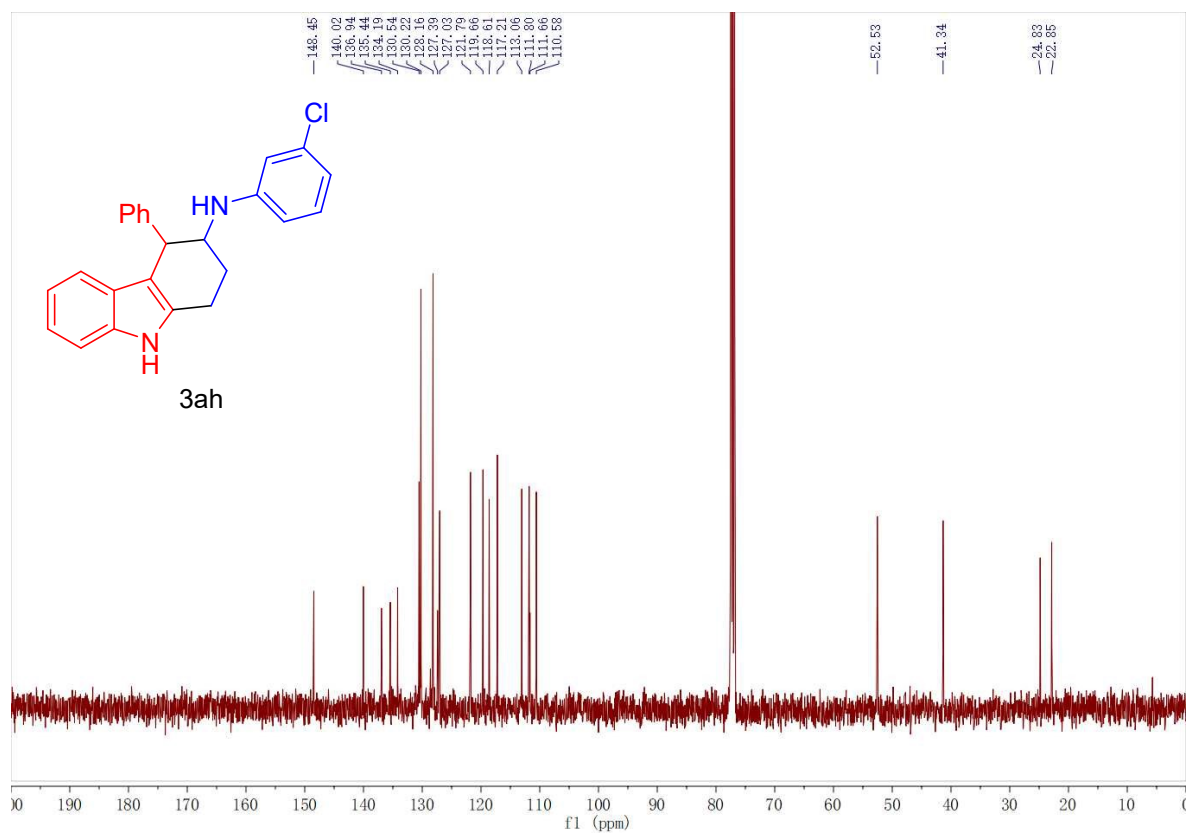





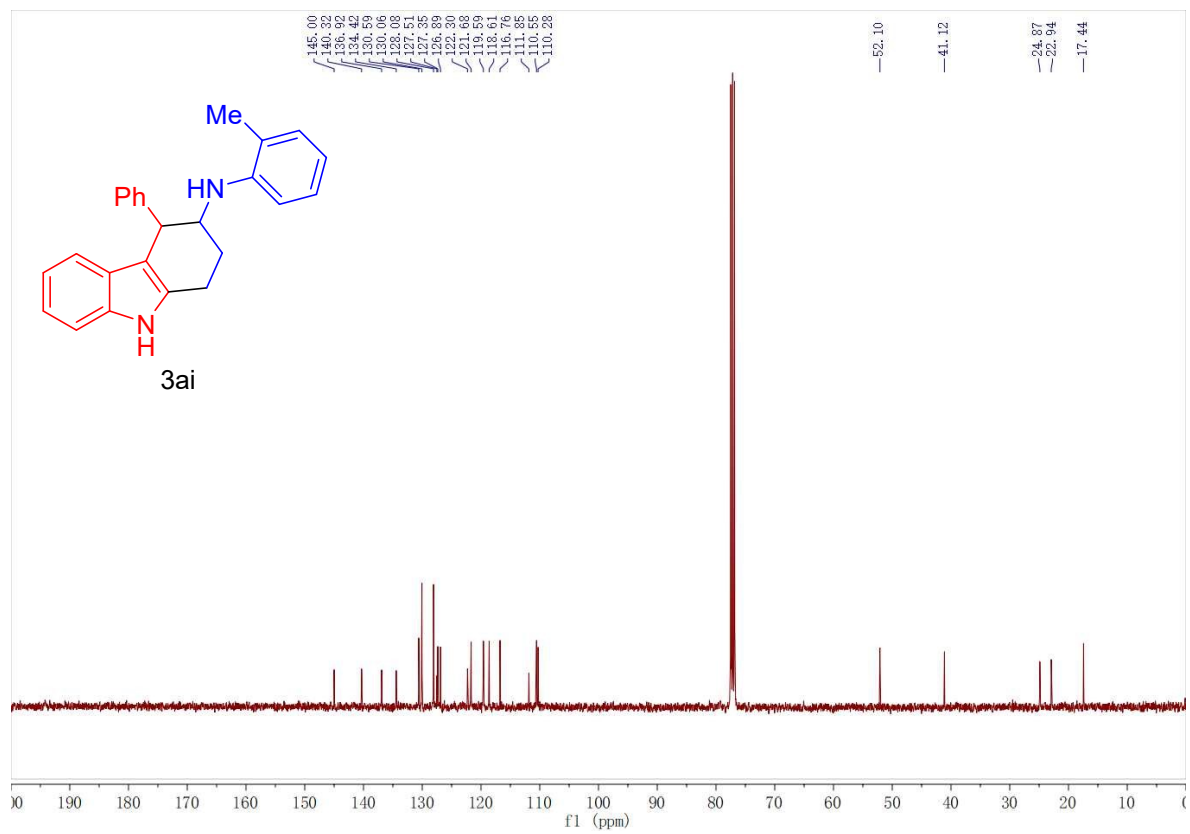

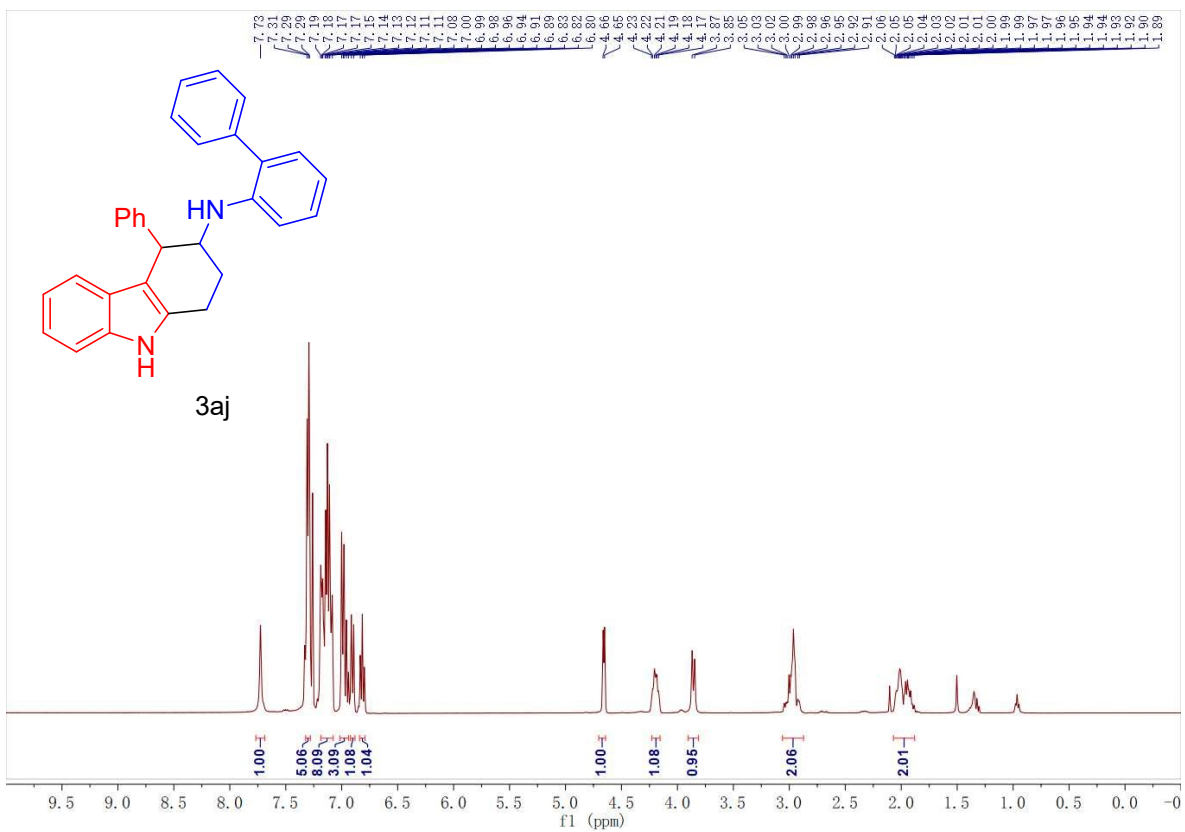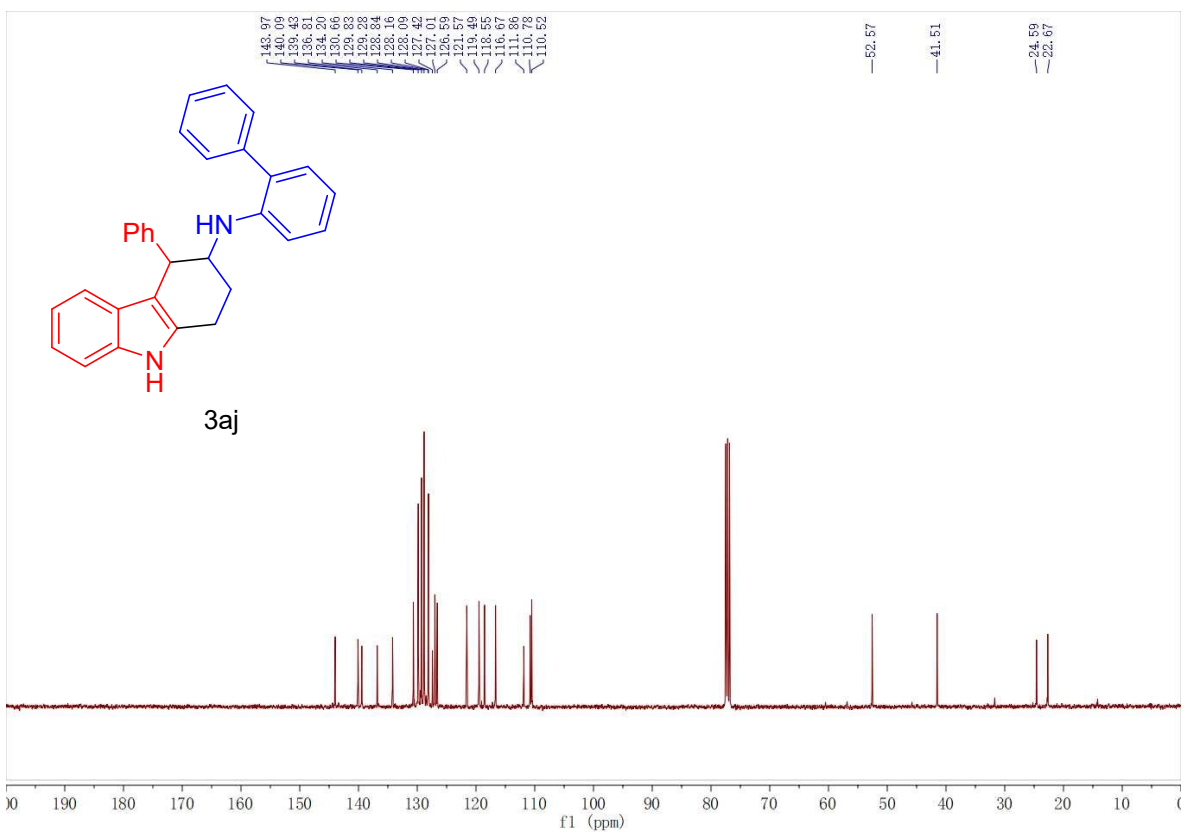

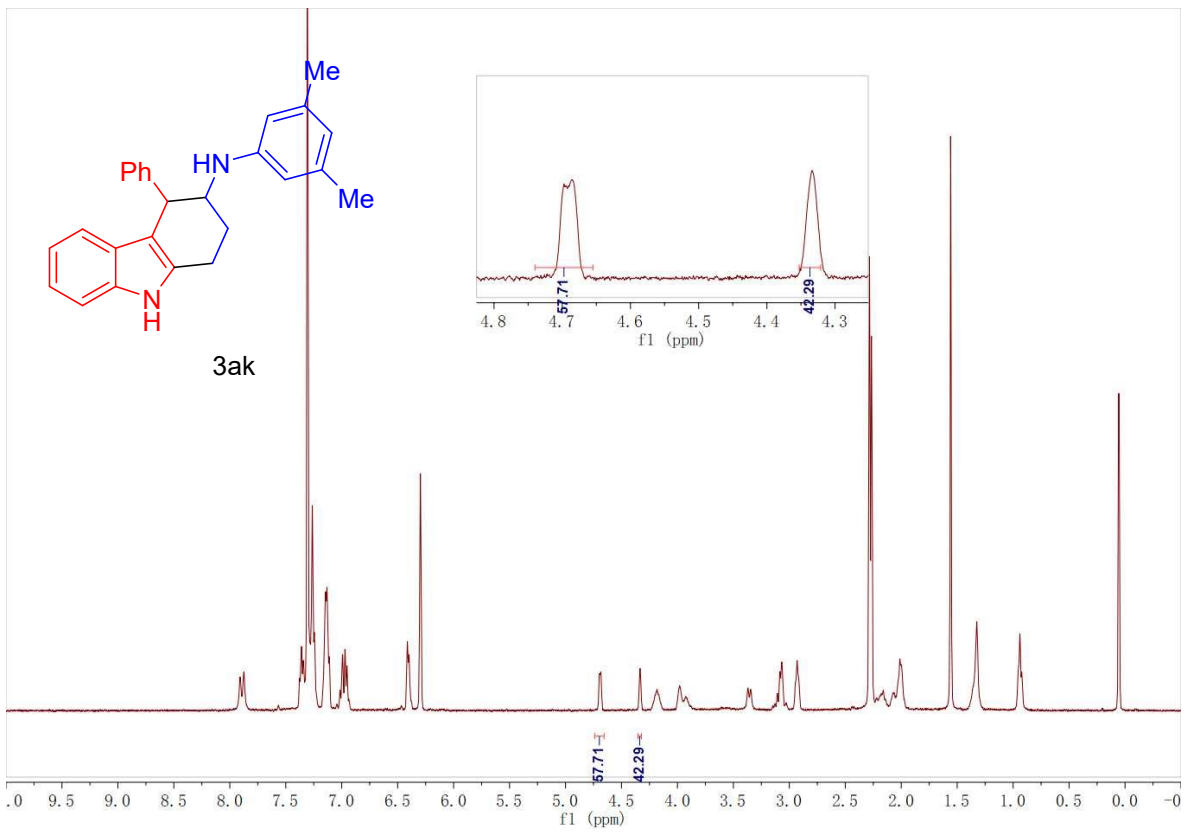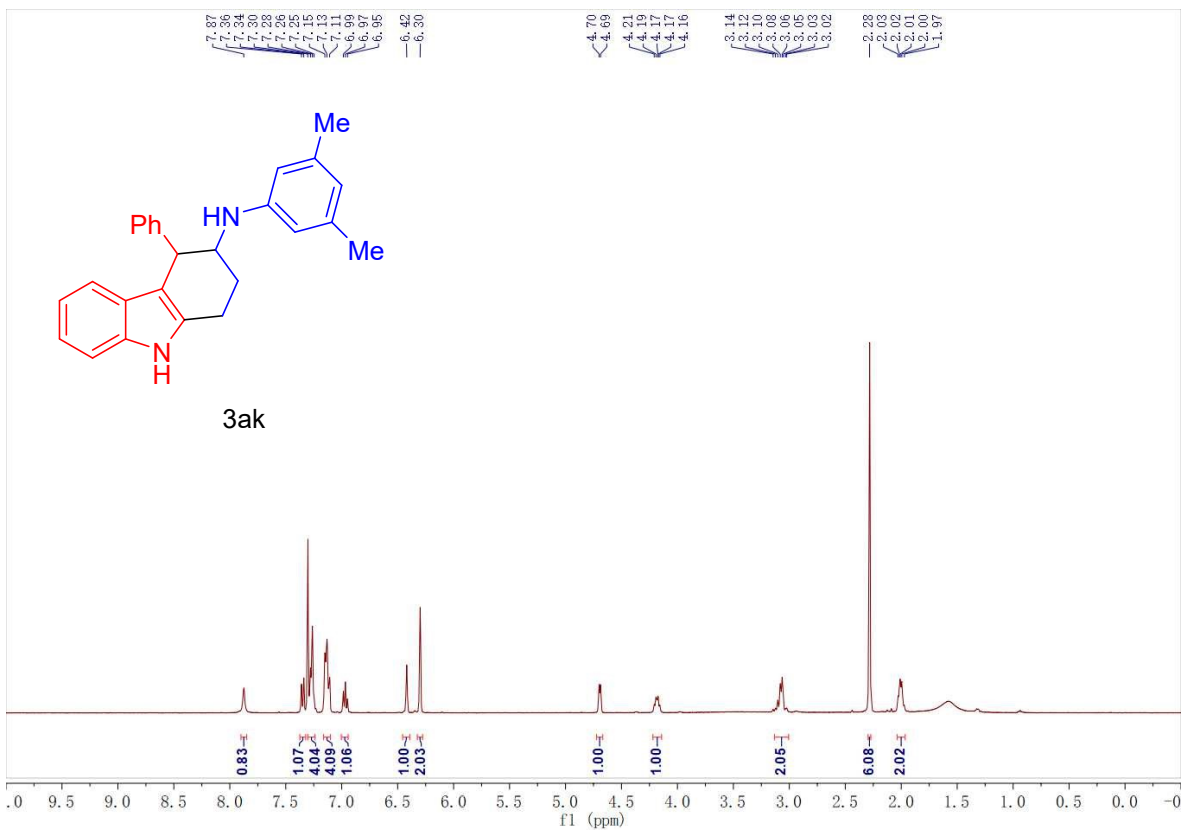

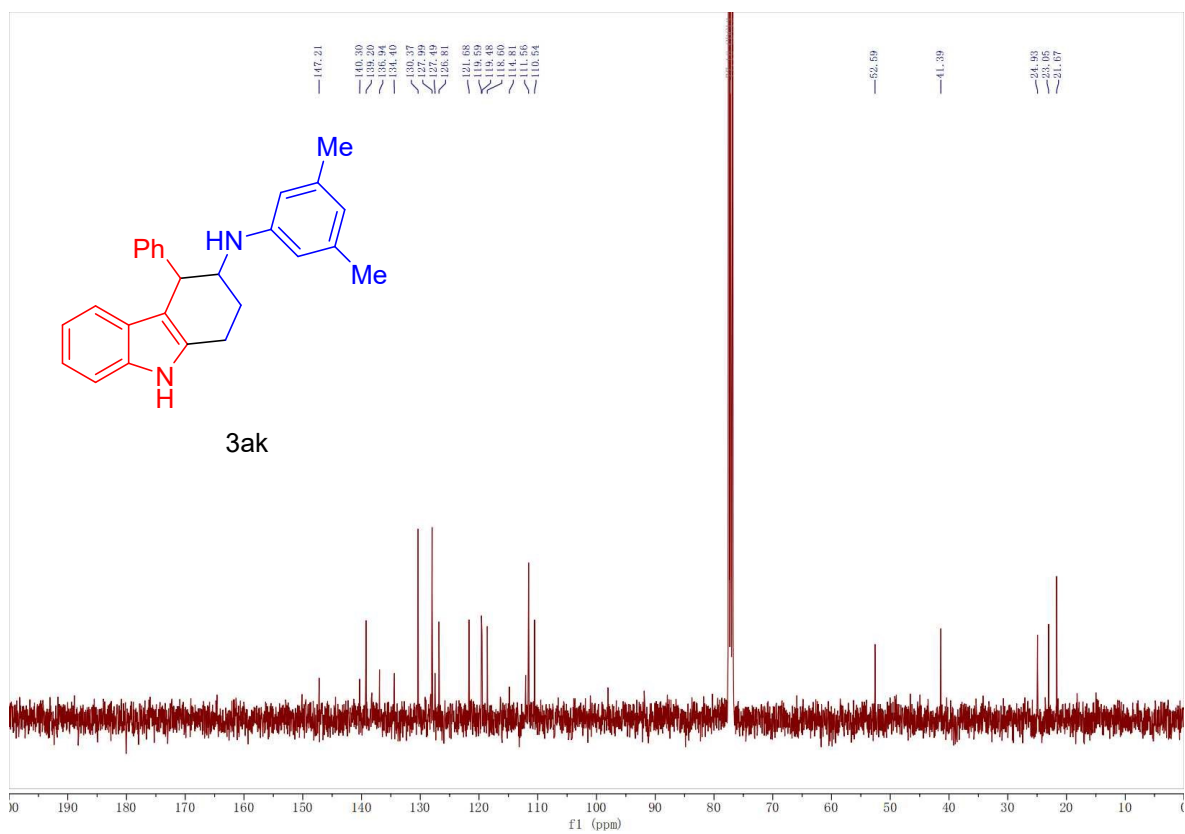

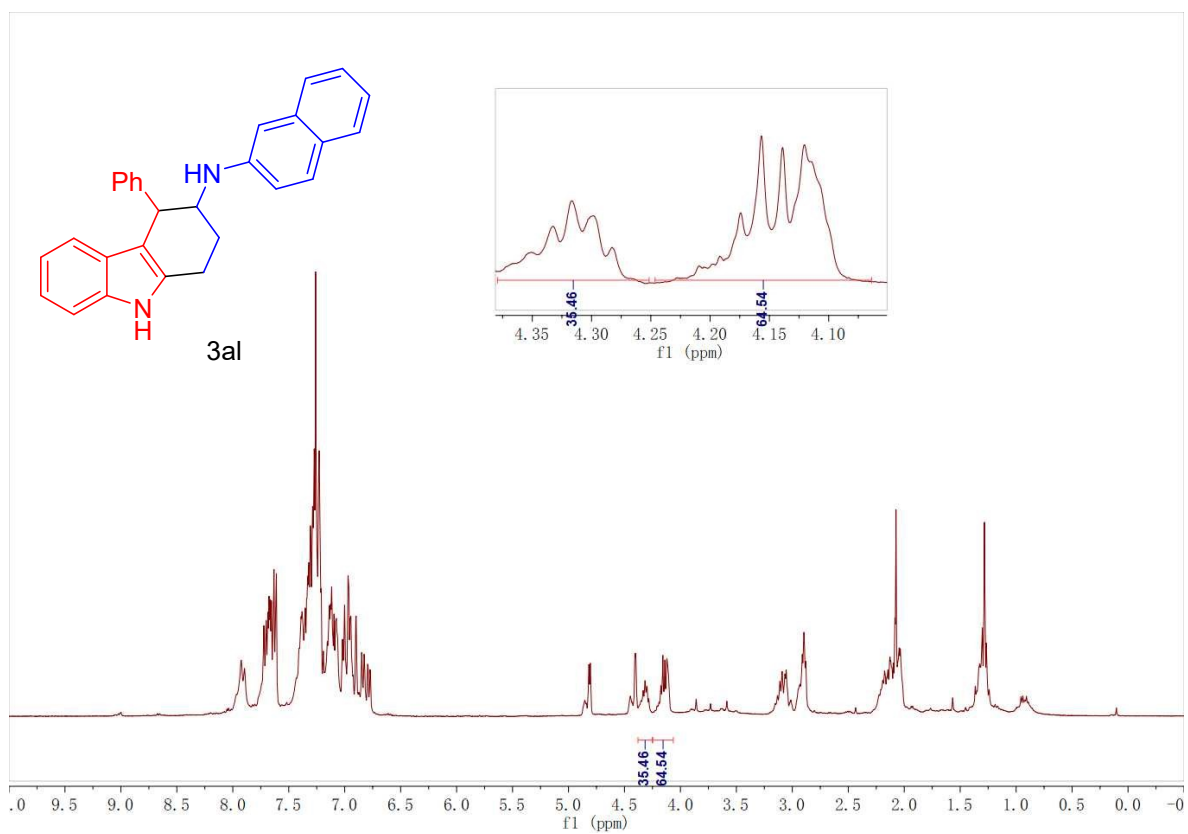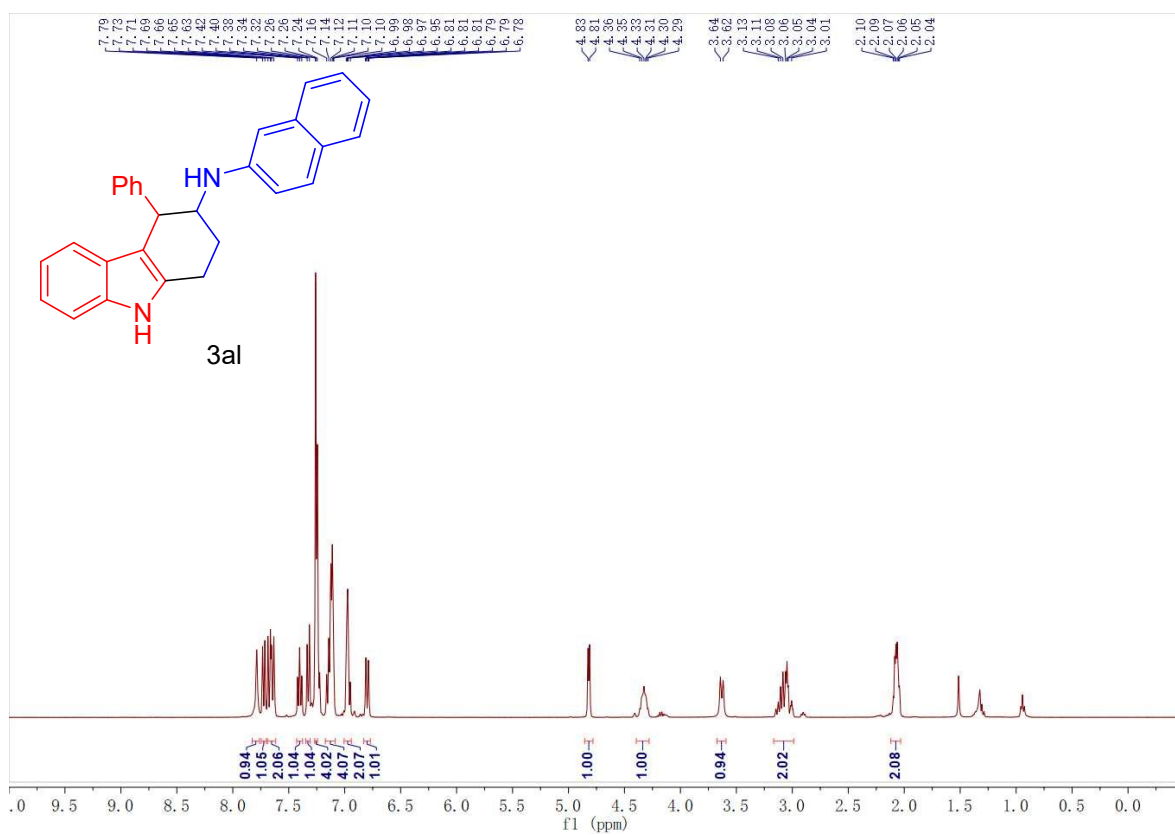



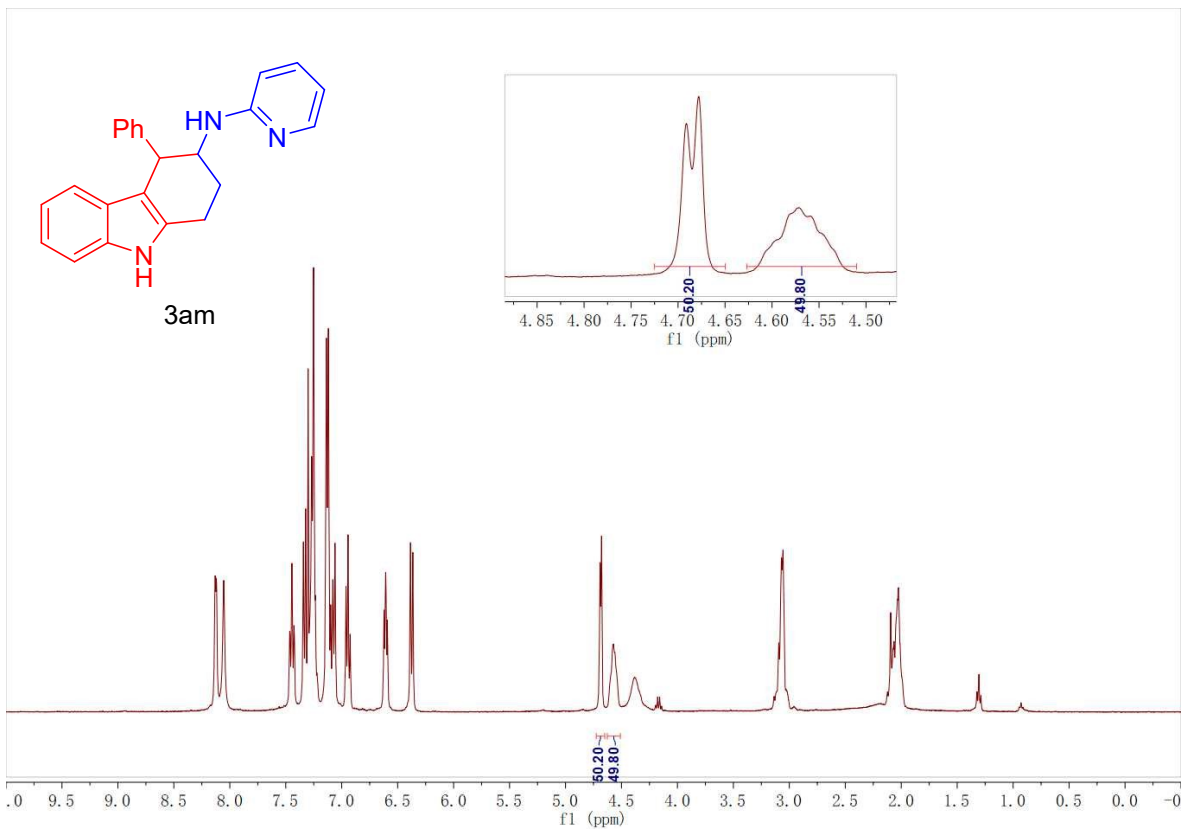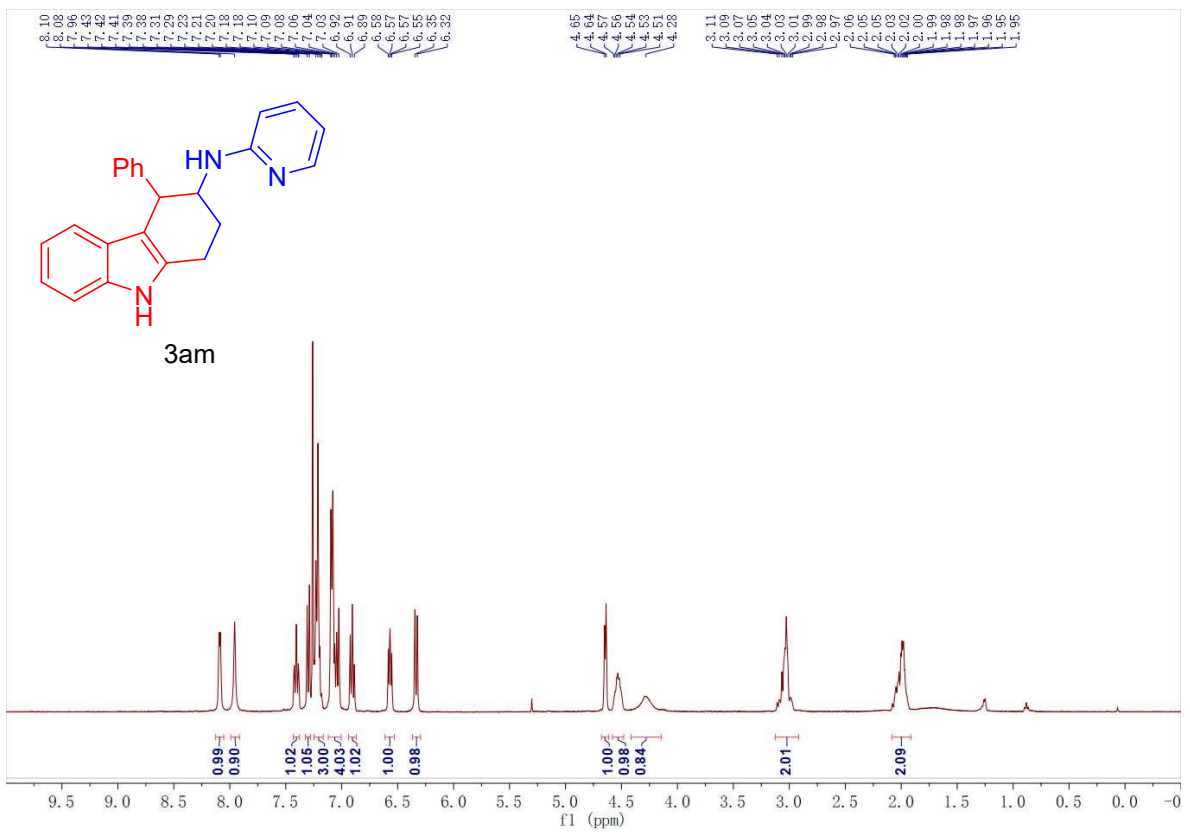

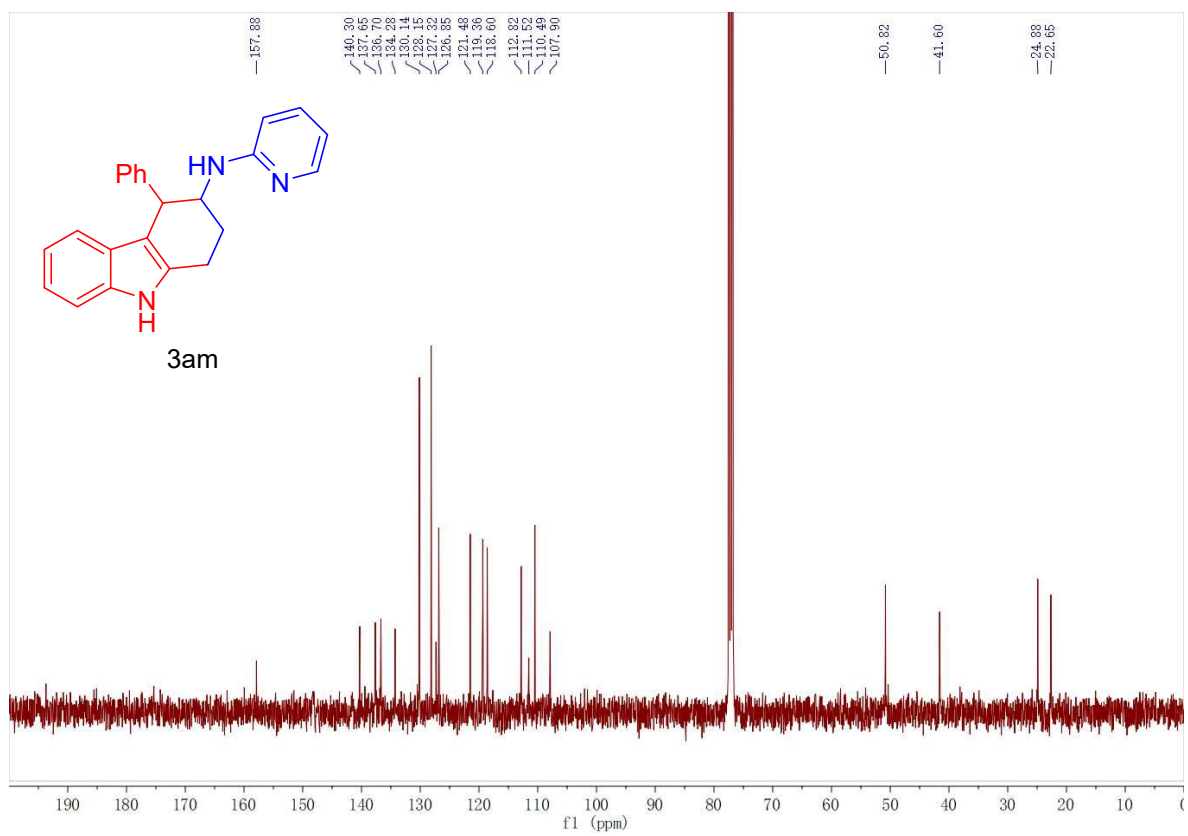

Supplement: d3cc04674e1.pdf [file d3cc04674e1.pdf]
